# Supplementary material for: Integrated bioinformatics analysis reveals dynamic candidate genes and signaling pathways involved in the progression and prognosis of diffuse large B-cell lymphoma
Source: PeerJ journal article supplement (doi:10.7717/peerj.12394), 2021-11-02

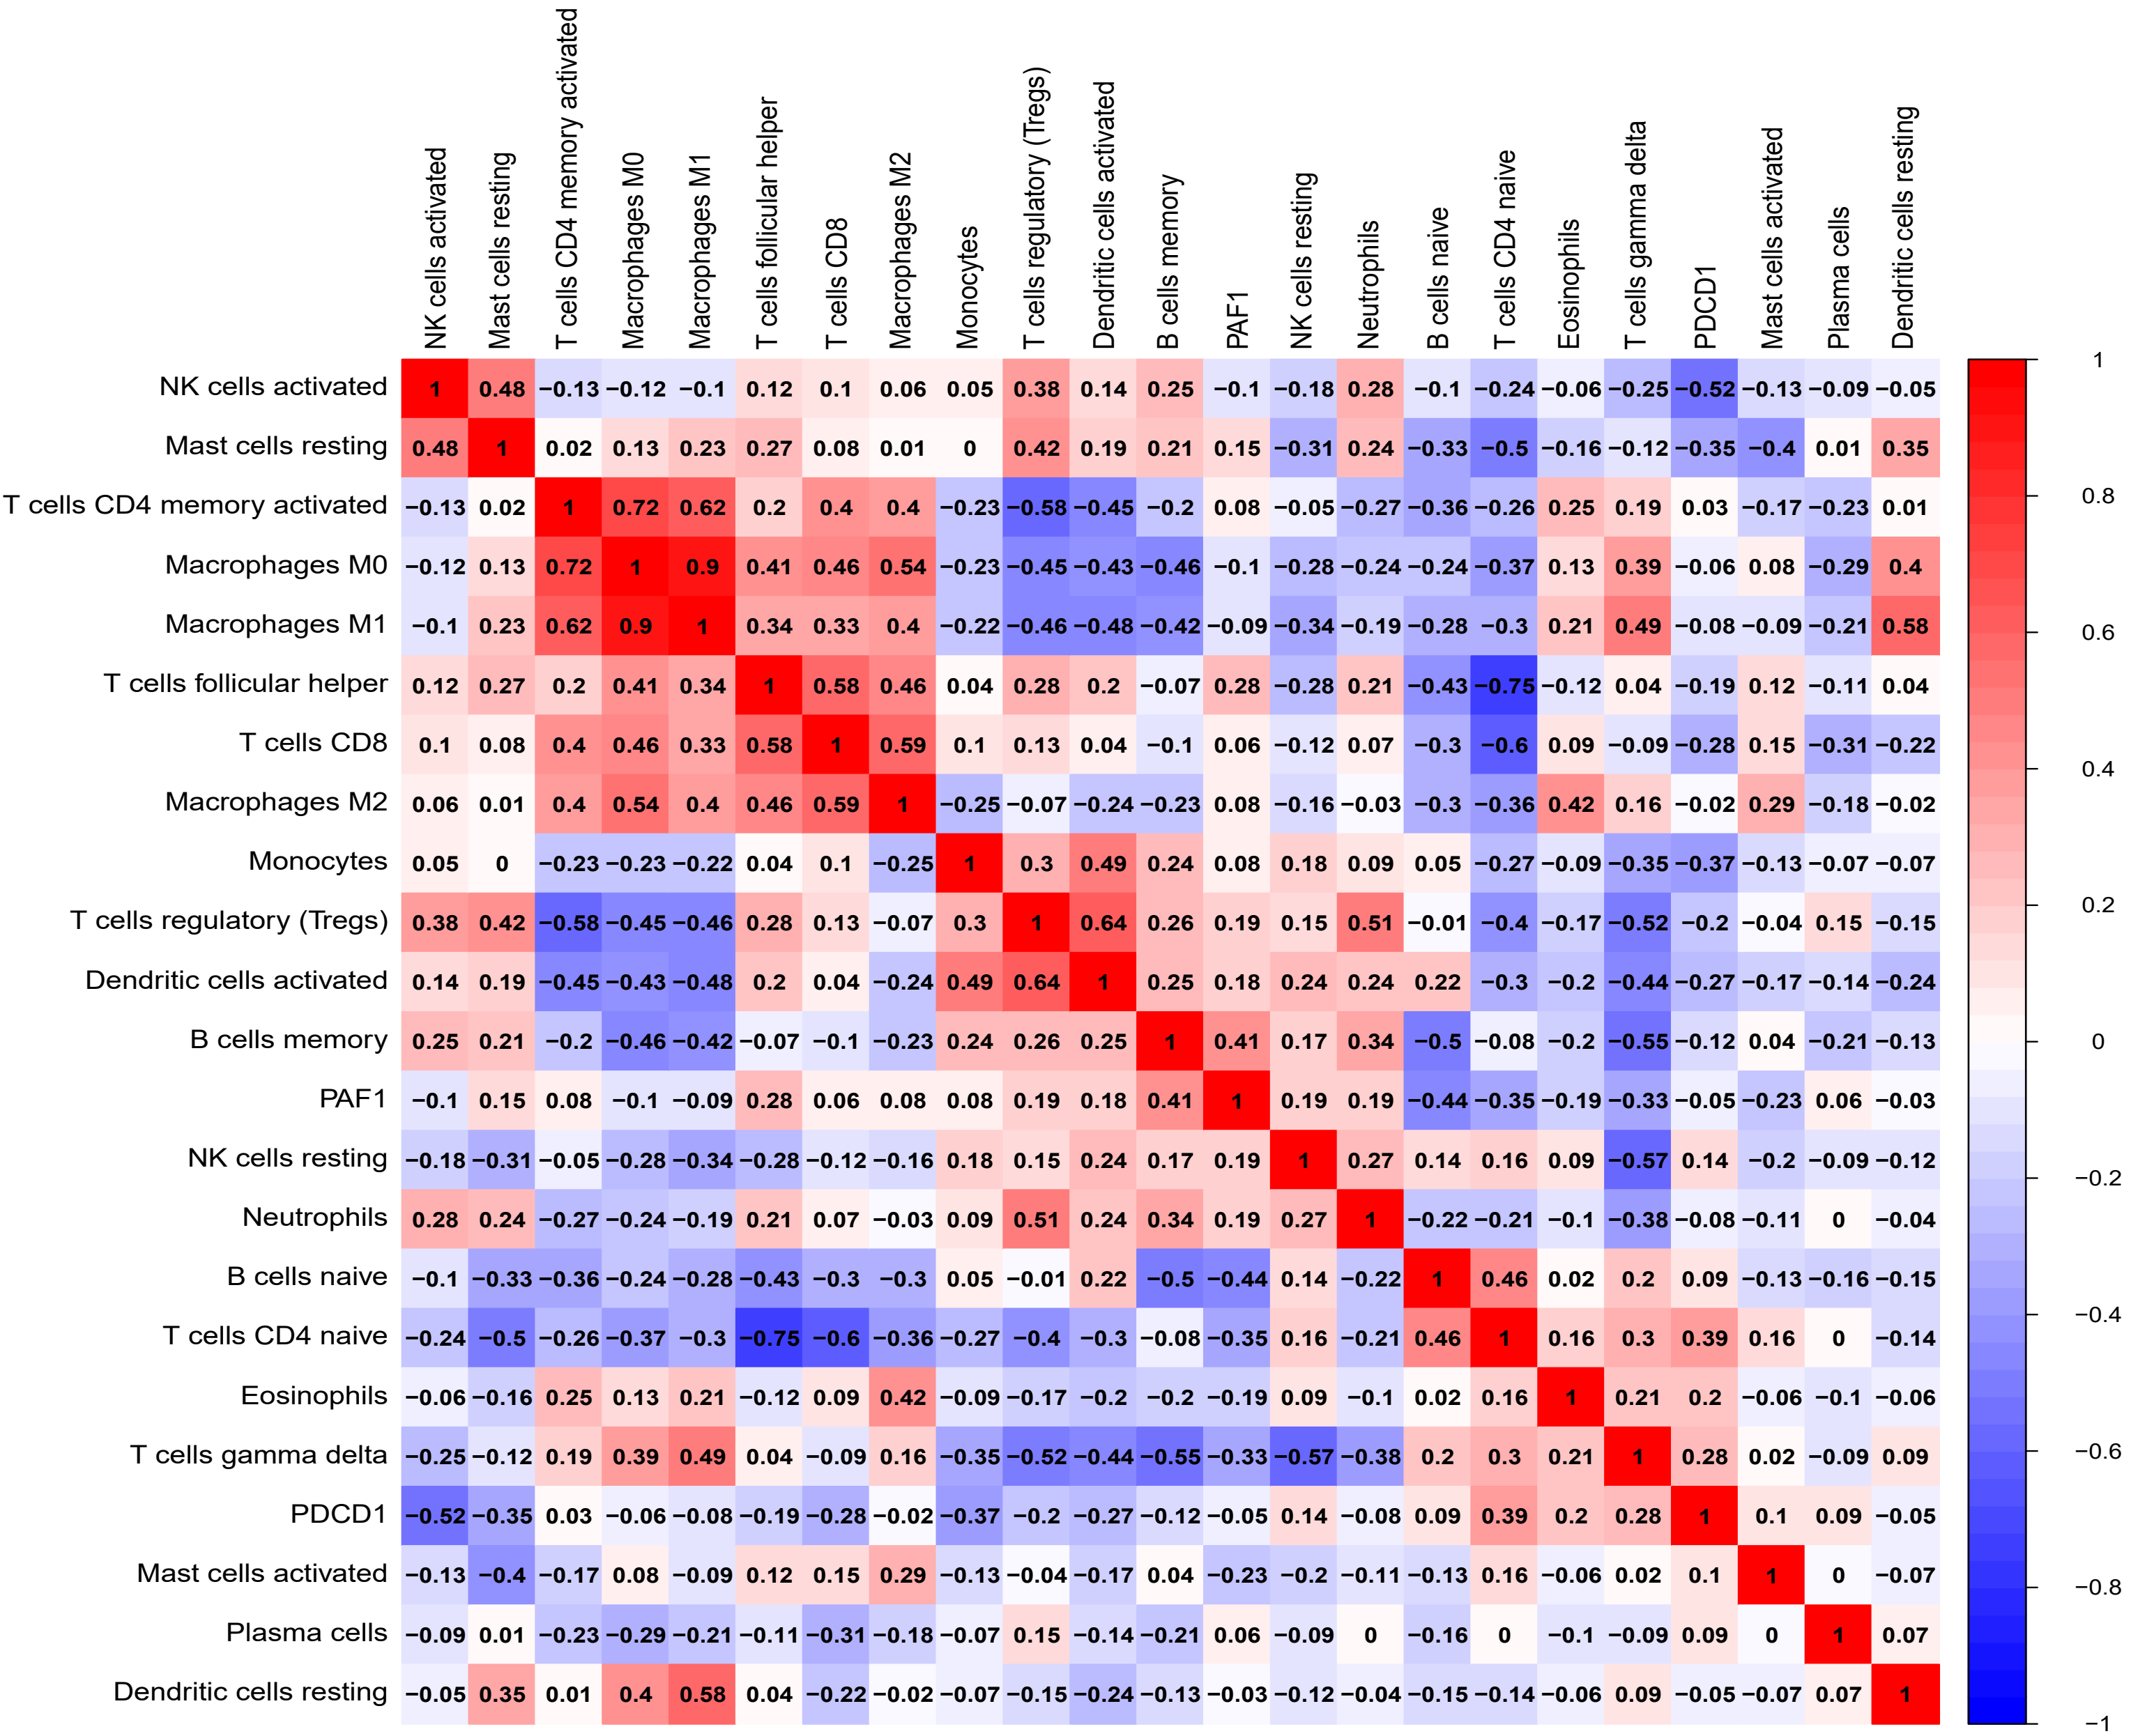

Supplement: Suppl_Figure_3.pdf [file Suppl_Figure_3.pdf]
