# Supplementary material for: Integrated bioinformatics analysis reveals dynamic candidate genes and signaling pathways involved in the progression and prognosis of diffuse large B-cell lymphoma
Source: PeerJ journal article supplement (doi:10.7717/peerj.12394), 2021-11-02
Supplement: Suppl_Figure_7.pdf [file Suppl_Figure_7.pdf]

HPA003371 (RPS21)

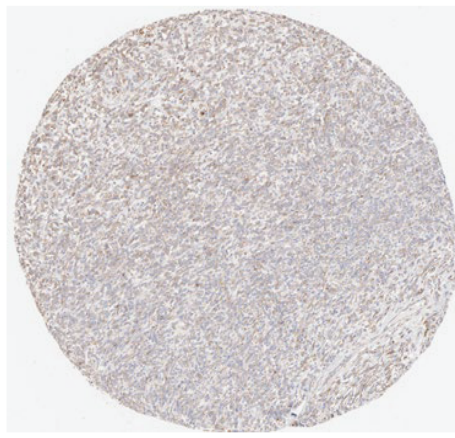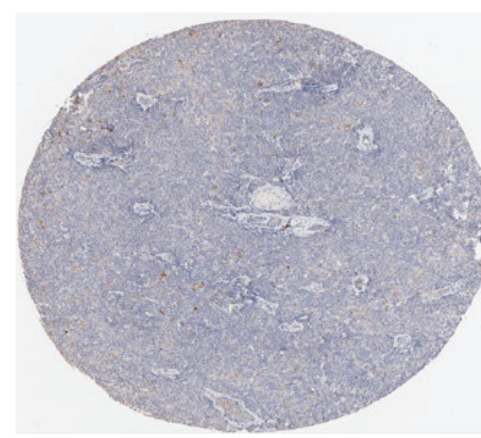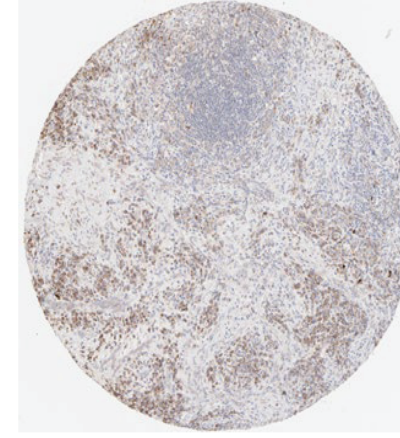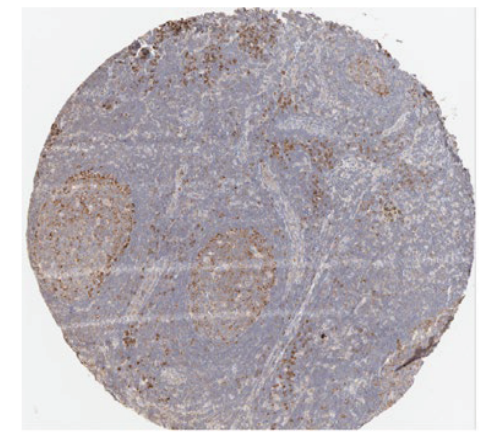

DLBCL; id:  
2207; (Q>75%)

LG; id: 1726;  
(Q 75%-25%)

HD-NOS; id: 370;  
(Q>75%)

NT-NOS (Q [GCC 75%-  
25%]; [N-GCC <25%] )

HPA027202 (MRPS28)

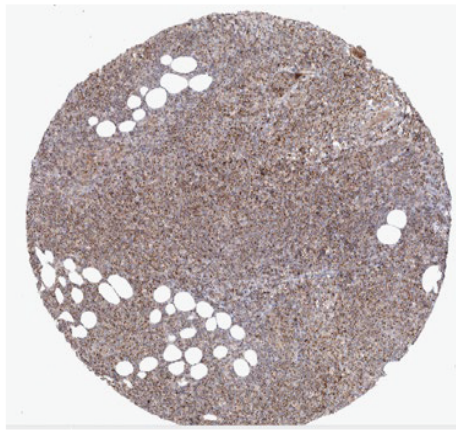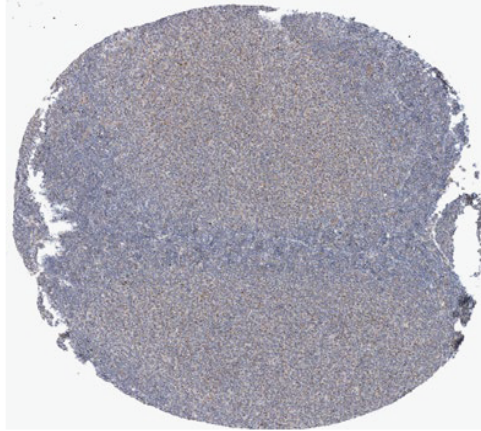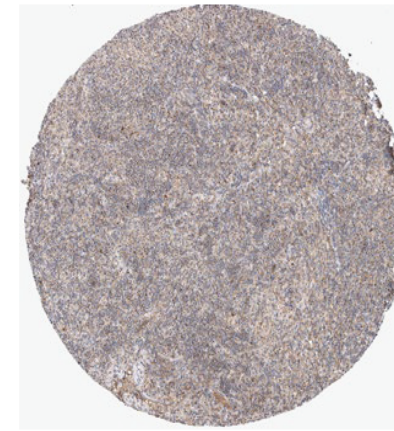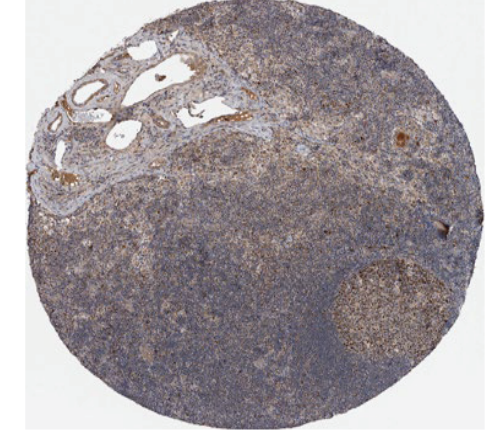

DBCL; id: 1748;  
(Q>75%)

LG; id: 2731;  
(Q=75%-25%)

HD-NOS; id: 3232;  
(Q>75%)

NT-NOS; id: 1690; (Q [GCC  
>75%]; [N-GCC <25%])

HPA072263 (RPL31)

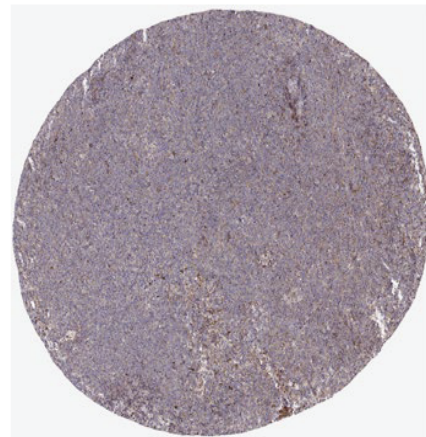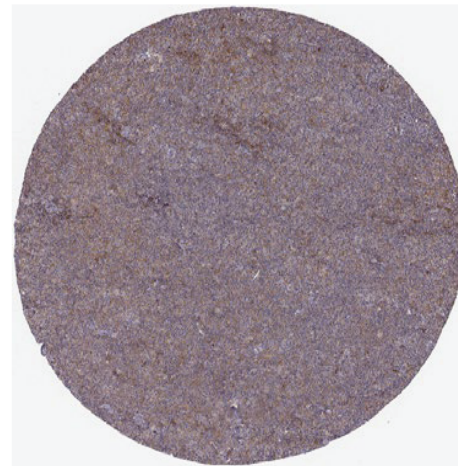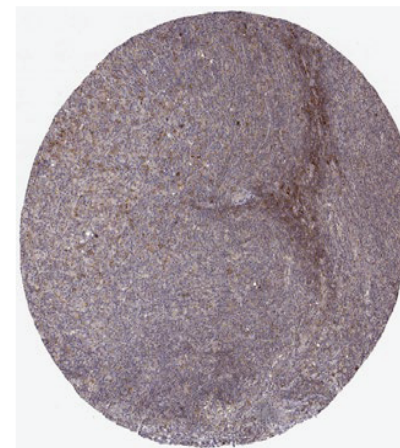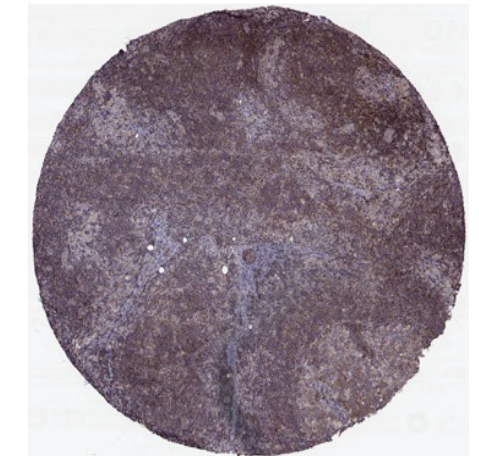

DLBCL; id: 3085;  
(Q 75%-25%)

LG; id: 3129; (Q=75%-  
25%)

HD-NOS; id: 2532;  
(Q>75%)

NT-NOS; id: 4449; (Q [GCC  
>75%]; [N-GCC <25%] )

HPA002651 (RPL30)

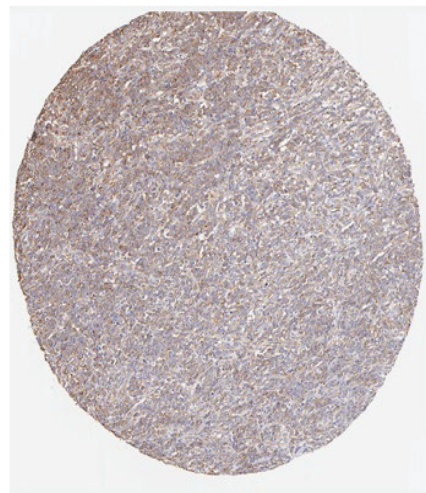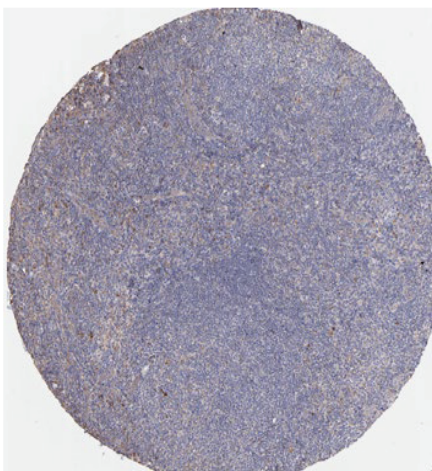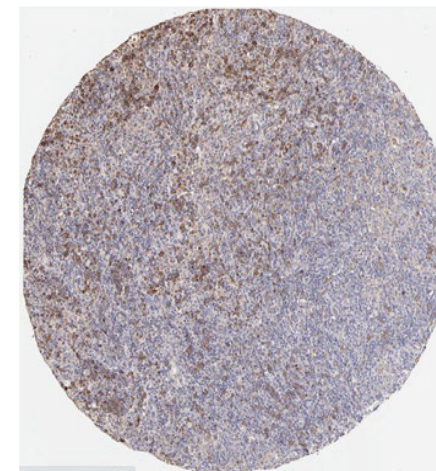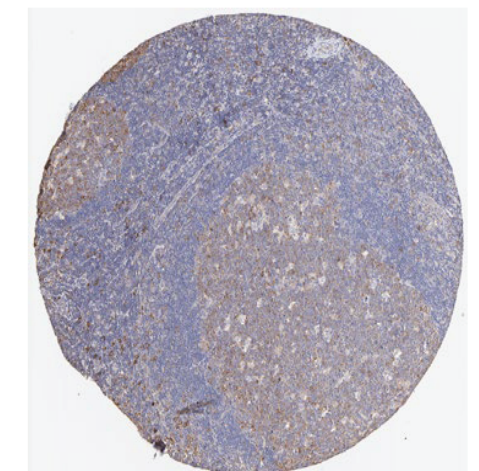

DLBCL; id: 2207; (Q  
75%-25%)

LG; 1618; (Q=75%-  
25%)

HD-NOS; id: 226;  
(Q<25%)

NT-NOS; id: 1636; (Q [GCC  
>75%]; [N-GCC <25%] )
