# Supplementary material for: Integrated bioinformatics analysis reveals dynamic candidate genes and signaling pathways involved in the progression and prognosis of diffuse large B-cell lymphoma
Source: PeerJ journal article supplement (doi:10.7717/peerj.12394), 2021-11-02
Supplement: Suppl_Figure_9.pdf [file Suppl_Figure_9.pdf]

| Analysis Type by Cancer     | Cancer vs. Normal | Cancer vs. Normal | Cancer vs. Normal | Cancer vs. Normal | Cancer vs. Normal | Cancer vs. Normal | Cancer vs. Normal | Cancer vs. Normal | Cancer vs. Normal | Cancer vs. Normal | Cancer vs. Normal | Cancer vs. Normal | Cancer vs. Normal | Cancer vs. Normal | Cancer vs. Normal |    |   |   |   |   |    |   |   |
|-----------------------------|-------------------|-------------------|-------------------|-------------------|-------------------|-------------------|-------------------|-------------------|-------------------|-------------------|-------------------|-------------------|-------------------|-------------------|-------------------|----|---|---|---|---|----|---|---|
|                             | RPS24             | RPS21             | RPL31             | RPL30             | RPS17             | MRPS28            | FAU               | RPS25             | RPL22L1           | NDUFA6            | CXCL9             | CCL4              | MRPL33            | HEBP1             | RPL11             |    |   |   |   |   |    |   |   |
| Bladder Cancer              |                   |                   |                   |                   |                   |                   |                   |                   |                   | 1                 | 1                 |                   |                   |                   |                   |    |   |   |   |   |    |   |   |
| Brain and CNS Cancer        |                   | 1                 | 3                 |                   | 1                 | 1                 |                   |                   | 4                 | 1                 |                   | 1                 |                   | 1                 |                   |    |   |   |   |   |    |   |   |
| Breast Cancer               | 1                 |                   |                   | 1                 |                   | 1                 |                   | 1                 |                   |                   | 11                | 1                 |                   | 1                 | 2                 |    |   |   |   |   |    |   |   |
| Cervical Cancer             |                   |                   |                   |                   |                   |                   |                   |                   |                   |                   | 2                 |                   |                   |                   |                   |    |   |   |   |   |    |   |   |
| Colorectal Cancer           | 1                 | 4                 |                   |                   |                   |                   |                   |                   | 7                 | 1                 |                   | 2                 |                   | 1                 |                   |    |   |   |   |   |    |   |   |
| Esophageal Cancer           |                   |                   |                   |                   | 1                 |                   |                   |                   |                   |                   |                   |                   |                   | 2                 | 1                 |    |   |   |   |   |    |   |   |
| Gastric Cancer              |                   | 1                 |                   | 1                 |                   | 1                 |                   |                   |                   |                   | 1                 |                   |                   |                   |                   |    |   |   |   |   |    |   |   |
| Head and Neck Cancer        |                   | 1                 |                   | 1                 |                   | 1                 |                   |                   |                   |                   | 4                 | 2                 |                   |                   |                   |    |   |   |   |   |    |   |   |
| Kidney Cancer               |                   |                   |                   | 1                 |                   |                   | 1                 | 1                 |                   | 3                 | 4                 |                   | 1                 |                   | 1                 |    |   |   |   |   |    |   |   |
| Leukemia                    |                   | 1                 |                   | 1                 | 1                 | 1                 |                   | 1                 | 1                 | 1                 | 1                 | 1                 | 5                 | 1                 | 5                 |    |   |   |   |   |    |   |   |
| Liver Cancer                |                   | 2                 | 1                 | 1                 |                   |                   |                   |                   |                   |                   | 2                 | 1                 |                   |                   |                   |    |   |   |   |   |    |   |   |
| Lung Cancer                 |                   |                   |                   |                   |                   |                   |                   |                   | 1                 |                   |                   |                   |                   |                   |                   |    |   |   |   |   |    |   |   |
| Lymphoma                    | 7                 | 6                 | 5                 | 5                 | 6                 | 1                 | 7                 | 3                 | 4                 | 7                 | 17                | 6                 | 3                 | 8                 | 3                 |    |   |   |   |   |    |   |   |
| Melanoma                    |                   |                   |                   |                   |                   |                   |                   |                   |                   |                   |                   |                   |                   |                   |                   |    |   |   |   |   |    |   |   |
| Myeloma                     |                   | 1                 |                   |                   |                   |                   | 1                 |                   |                   | 1                 |                   |                   |                   |                   |                   |    |   |   |   |   |    |   |   |
| Other Cancer                |                   | 2                 | 1                 | 1                 | 1                 | 3                 |                   |                   | 1                 |                   | 3                 | 4                 |                   | 1                 | 1                 |    |   |   |   |   |    |   |   |
| Ovarian Cancer              |                   |                   |                   |                   |                   |                   |                   |                   |                   |                   |                   |                   |                   |                   | 4                 |    |   |   |   |   |    |   |   |
| Pancreatic Cancer           |                   |                   |                   | 1                 |                   |                   |                   |                   |                   |                   |                   |                   |                   |                   | 1                 |    |   |   |   |   |    |   |   |
| Prostate Cancer             | 1                 | 1                 | 1                 | 1                 |                   |                   |                   |                   | 4                 |                   | 1                 |                   |                   |                   |                   |    |   |   |   |   |    |   |   |
| Sarcoma                     | 1                 | 1                 | 2                 |                   | 1                 |                   |                   | 1                 |                   |                   |                   |                   |                   |                   | 1                 |    |   |   |   |   |    |   |   |
| Significant Unique Analyses | 11                | 21                | 13                | 5                 | 10                | 7                 | 1                 | 9                 | 1                 | 5                 | 2                 | 22                | 11                | 4                 | 48                | 18 | 7 | 4 | 2 | 9 | 11 | 9 | 4 |
| Total Unique Analyses       | 419               | 440               | 447               | 420               | 389               | 377               | 413               | 429               | 278               | 374               | 452               | 397               | 417               | 383               | 444               |    |   |   |   |   |    |   |   |

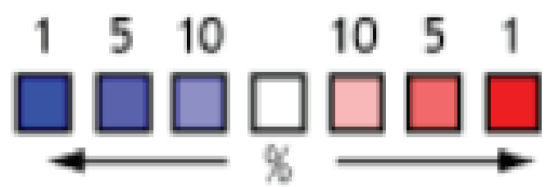

Cell color is determined by the best gene rank percentile for the analyses within the cell.

NOTE: An analysis may be counted in more than one cancer type.
