# Supplementary material for: Integrated bioinformatics analysis reveals dynamic candidate genes and signaling pathways involved in the progression and prognosis of diffuse large B-cell lymphoma
Source: PeerJ. 2021 Nov 2;9:e12394. doi: 10.7717/peerj.12394 (PMC8570165; doi:10.7717/peerj.12394)
Supplement: Supplemental Information 13 [file peerj-09-12394-s013.xlsx]

## Sheet: Up-regulated DEGs 
Gene symbols, probe IDs and log FC of the 1014 up-regulated genes (p < 0.05 and |log2FC|>1).
gene symbol	Probe ID	ENTREZ_GENE_ID	logFC	AveExpr	t	P.Value	adj.P.Val	B
IGFBP7	201162_at	3490	3.28923	3.30756	21.0336	6.28e-22	1.36e-17	39.2163
ATOX1	203454_s_at	475	3.18696	5.30977	19.0966	1.58e-20	1.71e-16	36.2393
ENPP2	209392_at	5168	3.79583	3.28421	18.4784	4.68e-20	2.65e-16	35.2252
SPARC	200665_s_at	6678	3.49733	3.06618	18.4514	4.91e-20	2.65e-16	35.1803
PTGDS	211663_x_at	5730	3.48094	4.65812	18.2758	6.73e-20	2.65e-16	34.8858
MMP9	203936_s_at	4318	4.93913	6.25628	18.2268	7.35e-20	2.65e-16	34.8031
ADAMDEC1	206134_at	27299	4.79175	3.51783	17.5037	2.76e-19	8.54e-16	33.5584
RNA45S5	225762_x_at	100861532	3.78155	6.99995	17.1988	4.89e-19	1.32e-15	33.019
RAB13	202252_at	5872	4.21657	5.74608	16.9647	7.62e-19	1.83e-15	32.599
NR1H3	203920_at	10062	3.80591	4.02045	16.4007	2.27e-18	4.91e-15	31.5648
TXN	208864_s_at	7295	3.12555	5.14475	15.4103	1.65e-17	3.25e-14	29.6706
RARRES2	209496_at	5919	2.07166	4.11679	15.307	2.04e-17	3.68e-14	29.467
GPNMB	1554018_at	10457	3.89467	2.91648	15.1119	3.06e-17	5.09e-14	29.0795
GPX4	201106_at	2879	2.12292	6.27082	14.9838	3.99e-17	6.18e-14	28.8227
CSTA	204971_at	1475	4.26259	3.94124	14.5838	9.31e-17	1.34e-13	28.0091
BRI3	223376_s_at	25798	2.53486	6.01724	14.3685	1.48e-16	2e-13	27.5636
AKIP1	219953_s_at	56672	1.18583	3.56895	14.2511	1.91e-16	2.43e-13	27.3186
APOC1	204416_x_at	341	2.79414	5.87138	14.0647	2.86e-16	3.44e-13	26.9261
COX7C	201134_x_at	1350	2.24339	6.36473	13.768	5.51e-16	6.08e-13	26.2927
RASSF4	221578_at	83937	1.40877	2.91185	13.76	5.61e-16	6.08e-13	26.2755
TGFB1I1	209651_at	7041	2.46207	3.08665	13.498	1.01e-15	1.04e-12	25.7071
PLAU	205479_s_at	5328	1.16257	3.21164	13.0472	2.82e-15	2.78e-12	24.7098
PLXND1	1563657_at	23129	1.21693	4.5626	13.0031	3.12e-15	2.9e-12	24.6109
CEBPD	203973_s_at	1052	2.0731	3.47798	12.9906	3.22e-15	2.9e-12	24.5828
C11orf96	227099_s_at	387763	3.66035	3.29648	12.9278	3.72e-15	3.22e-12	24.4414
LOC101927609	239775_at	101927609	2.10336	3.24353	12.8629	4.32e-15	3.6e-12	24.2947
NDUFAF2	228355_s_at	91942	1.9899	4.62132	12.8026	4.98e-15	3.99e-12	24.1578
ITPA	209171_at	3704	1.17229	5.83407	12.7429	5.72e-15	4.43e-12	24.0221
LGALS3	1557197_a_at	3958	2.37425	4.22699	12.6688	6.81e-15	5.09e-12	23.8527
CST7	210140_at	8530	3.04936	3.58409	12.607	7.88e-15	5.69e-12	23.7111
PSMB5	208799_at	5693	1.98739	6.0681	12.479	1.07e-14	7.45e-12	23.4161
C19orf70	225823_at	125988	2.1435	4.79907	12.3607	1.41e-14	9.39e-12	23.1417
MRPL14	225201_s_at	64928	1.83721	6.98508	12.3555	1.43e-14	9.39e-12	23.1295
RPS19	202649_x_at	6223	1.60855	8.20534	12.2514	1.84e-14	1.17e-11	22.8862
TP53TG1	209917_s_at	11257	1.71979	4.46376	12.2141	2.01e-14	1.21e-11	22.7989
ZBED6CL	227598_at	113763	1.56016	5.43927	12.2131	2.01e-14	1.21e-11	22.7964
HINT1	1555960_at	3094	1.35483	7.07966	11.9802	3.54e-14	1.96e-11	22.2462
EIF4EBP1	221539_at	1978	1.81972	4.89404	11.8837	4.48e-14	2.42e-11	22.0162
BATF	205965_at	10538	3.00912	5.78387	11.7824	5.74e-14	3.03e-11	21.7732
TIMM8B	218357_s_at	26521	1.78903	5.46455	11.7214	6.67e-14	3.44e-11	21.6264
CXCL9	203915_at	4283	5.45362	4.3196	11.7012	7.01e-14	3.53e-11	21.5776
CYFIP1	208923_at	23191	3.04426	4.63456	11.6888	7.23e-14	3.56e-11	21.5476
C1orf53	1558507_at	388722	1.17665	2.56571	11.6623	7.72e-14	3.64e-11	21.4834
RAB42	1552846_s_at	115273	2.62475	3.94591	11.5253	1.09e-13	4.8e-11	21.1507
MAFB	218559_s_at	9935	3.72578	4.43706	11.4916	1.18e-13	5.11e-11	21.0683
SEPW1	1555851_s_at	6415	1.76565	5.23089	11.4637	1.27e-13	5.37e-11	21.0003
UXT	218495_at	8409	1.46959	8.78058	11.4426	1.33e-13	5.56e-11	20.9485
PRKCDBP	213010_at	112464	1.1051	2.81258	11.4149	1.43e-13	5.84e-11	20.8806
RP3-486D24.1	234512_x_at		1.12823	7.28472	11.4024	1.48e-13	5.92e-11	20.8499
SLAMF8	219385_at	56833	3.01944	3.55597	11.3318	1.76e-13	6.89e-11	20.6762
FAM162A	220942_x_at	26355	1.39251	3.84399	11.3275	1.78e-13	6.89e-11	20.6655
NINJ1	203045_at	4814	2.57629	5.25969	11.2542	2.14e-13	7.86e-11	20.4845
COX14	225772_s_at	84987	1.94747	5.00365	11.234	2.25e-13	8e-11	20.4346
C4orf48	229860_x_at	401115	2.96879	6.59096	11.1534	2.77e-13	9.59e-11	20.2343
FBXO6	231769_at	26270	3.13635	3.88138	11.1499	2.79e-13	9.59e-11	20.2257
RGL1	209568_s_at	23179	2.81066	4.90773	11.083	3.31e-13	1.12e-10	20.0588
TOPORS-AS1	221979_at	100129250	1.15751	4.10787	11.0371	3.72e-13	1.22e-10	19.944
HSPE1	205133_s_at	3336	2.28195	5.13664	11.0142	3.94e-13	1.27e-10	19.8867
NDUFB1	206790_s_at	4707	1.40477	4.63334	10.923	4.98e-13	1.56e-10	19.6573
GZMH	210321_at	2999	2.61287	3.85816	10.9089	5.17e-13	1.6e-10	19.6217
GGCX	205351_at	2677	1.17538	4.53345	10.8847	5.5e-13	1.68e-10	19.5606
ATP5G1	208972_s_at	516	1.66615	6.76464	10.8778	5.6e-13	1.68e-10	19.5432
GSTO1	1557915_s_at	9446	1.84918	5.63915	10.8576	5.9e-13	1.75e-10	19.4921
NIT2	218557_at	56954	1.97768	4.95709	10.8447	6.09e-13	1.78e-10	19.4596
COX5B	202343_x_at	1329	1.56747	5.63323	10.8183	6.52e-13	1.86e-10	19.3926
CTSC	201487_at	1075	2.05651	3.9618	10.8184	6.52e-13	1.86e-10	19.3929
CCL5	1405_i_at	6352	3.16378	3.67615	10.813	6.61e-13	1.86e-10	19.3793
COX6C	201754_at	1345	2.62553	4.90781	10.8012	6.82e-13	1.89e-10	19.3493
RPS25	200091_s_at	6230	1.45164	8.81758	10.7678	7.43e-13	2.04e-10	19.2645
APRT	203219_s_at	353	1.35556	7.70509	10.7575	7.63e-13	2.07e-10	19.2384
C14orf2	202279_at	9556	2.31448	5.1549	10.7264	8.28e-13	2.14e-10	19.1592
BLOC1S1	202592_at	2647	1.60811	5.92541	10.6987	8.89e-13	2.21e-10	19.0886
EFHD2	217992_s_at	79180	1.72461	5.40335	10.6923	9.04e-13	2.22e-10	19.0722
RP3-507I15.1	217256_x_at		1.38584	4.50902	10.6859	9.19e-13	2.24e-10	19.0558
GPX1	200736_s_at	2876	2.40829	7.6433	10.669	9.61e-13	2.28e-10	19.0128
SERPINF1	202283_at	5176	2.03019	3.38034	10.6669	9.66e-13	2.28e-10	19.0072
PIN4	204571_x_at	5303	1.05709	4.3003	10.6025	1.14e-12	2.62e-10	18.8424
SH2D2A	207351_s_at	9047	1.33794	4.68901	10.6007	1.15e-12	2.62e-10	18.8378
RBX1	218117_at	9978	1.25797	4.09562	10.5735	1.23e-12	2.78e-10	18.768
ATP5E	217801_at	514	1.16546	4.94431	10.5496	1.31e-12	2.93e-10	18.7066
APOE	203381_s_at	348	1.11203	4.83482	10.5262	1.39e-12	3.05e-10	18.6465
PPP1R14B	212680_x_at	26472	1.94003	6.80926	10.5258	1.4e-12	3.05e-10	18.6453
MRPS17	218982_s_at	51373	2.78193	4.36646	10.5185	1.42e-12	3.08e-10	18.6266
CKLF	221058_s_at	51192	2.13303	5.37187	10.5092	1.46e-12	3.12e-10	18.6025
CXCL10	204533_at	3627	4.36927	3.97255	10.4975	1.5e-12	3.13e-10	18.5725
C15orf61	229742_at	145853	2.2798	4.4171	10.4639	1.64e-12	3.39e-10	18.4857
RAB32	204214_s_at	10981	1.14575	3.50892	10.4525	1.69e-12	3.46e-10	18.4564
ARMC10	1554480_a_at	83787	1.19855	3.70073	10.4326	1.78e-12	3.61e-10	18.4048
CD3D	213539_at	915	3.37794	5.37413	10.4028	1.93e-12	3.83e-10	18.3278
GLIS2	223378_at	84662	1.89321	3.95994	10.4034	1.93e-12	3.83e-10	18.3293
VAMP8	202546_at	8673	1.90948	4.31103	10.3885	2e-12	3.94e-10	18.2906
UQCR11	202090_s_at	10975	1.26853	5.95331	10.3695	2.11e-12	4.11e-10	18.2412
UQCRB	205849_s_at	7381	1.00352	3.33911	10.3565	2.18e-12	4.21e-10	18.2077
DRAM1	218627_at	55332	2.53534	3.22736	10.3062	2.49e-12	4.77e-10	18.0766
POLR2H	209302_at	5437	1.59641	6.79825	10.2536	2.86e-12	5.44e-10	17.9396
RP3-334F4.1	216806_at		1.19628	4.97179	10.2206	3.13e-12	5.89e-10	17.8533
C7orf55	226780_s_at	154791	1.54106	4.55043	10.2108	3.21e-12	5.99e-10	17.8275
NDUFA3	218563_at	4696	1.98884	7.16961	10.2064	3.25e-12	6.01e-10	17.8161
CECR5	218592_s_at	27440	1.36231	6.42654	10.1836	3.45e-12	6.28e-10	17.7562
MRPL33	203781_at	9553	2.05527	5.32026	10.1632	3.64e-12	6.55e-10	17.7028
G0S2	213524_s_at	50486	1.9785	3.80988	10.1614	3.66e-12	6.55e-10	17.698
NOP10	217962_at	55505	2.01778	6.11102	10.1535	3.74e-12	6.62e-10	17.6774
MRPL21	225315_at	219927	1.23168	4.23883	10.1509	3.76e-12	6.62e-10	17.6706
BOLA3	227291_s_at	388962	2.2742	6.30163	10.1113	4.18e-12	7.25e-10	17.5664
RPL12	200809_x_at	6136	1.2934	9.95667	10.0975	4.34e-12	7.46e-10	17.5301
FAU	200019_s_at	2197	1.23	10.564	10.0663	4.72e-12	7.98e-10	17.448
NDUFA1	202298_at	4694	1.42763	6.36687	10.0632	4.76e-12	7.99e-10	17.4397
RPS10L	216505_x_at		1.32056	6.52773	10.0429	5.03e-12	8.31e-10	17.3861
EBI3	219424_at	10148	1.72756	6.33094	10.0288	5.22e-12	8.56e-10	17.3489
RPS21	200834_s_at	6227	2.09092	9.02033	10.0174	5.38e-12	8.76e-10	17.3186
PTRHD1	226243_at	391356	1.33605	5.40017	10.0148	5.42e-12	8.76e-10	17.3118
MSRB1	217977_at	51734	2.09753	6.13185	10.0112	5.47e-12	8.78e-10	17.3024
CTSL	202087_s_at	1514	1.99869	4.46648	9.99484	5.72e-12	9.1e-10	17.2591
FTH1P5	211628_x_at	2509	1.52451	10.3155	9.988	5.82e-12	9.2e-10	17.241
SLIRP	221434_s_at	81892	2.74593	4.18751	9.9745	6.04e-12	9.48e-10	17.2052
TOMM5	225036_at	401505	2.54485	6.68974	9.96451	6.2e-12	9.62e-10	17.1787
PCOLCE	202465_at	5118	1.33048	3.82935	9.96352	6.22e-12	9.62e-10	17.1761
COX8A	201119_s_at	1351	1.81508	5.71471	9.94398	6.56e-12	1.01e-09	17.1243
NDUFB2	218200_s_at	4708	1.19915	5.88687	9.90306	7.32e-12	1.11e-09	17.0155
SLCO2B1	203472_s_at	11309	1.17997	3.70109	9.87563	7.89e-12	1.17e-09	16.9425
MGAT4B	220189_s_at	11282	1.34119	4.2476	9.83225	8.87e-12	1.28e-09	16.8268
RPL36	219762_s_at	25873	1.84054	8.02349	9.81834	9.21e-12	1.32e-09	16.7897
RPS7	200082_s_at	6201	1.03784	8.75489	9.80441	9.56e-12	1.36e-09	16.7525
PLA2G7	206214_at	7941	2.85738	2.7481	9.76786	1.06e-11	1.48e-09	16.6547
UFC1	217797_at	51506	1.44981	6.79151	9.73851	1.14e-11	1.58e-09	16.576
BLVRA	203771_s_at	644	1.05459	3.72898	9.73352	1.16e-11	1.59e-09	16.5626
LOC284889	1556316_s_at	284889	2.31939	5.41726	9.71222	1.23e-11	1.67e-09	16.5054
USMG5	225413_at	84833	2.33188	8.30781	9.70978	1.24e-11	1.67e-09	16.4989
CARD16	1552701_a_at	114769	1.37603	3.39293	9.70721	1.25e-11	1.68e-09	16.492
NENF	213673_x_at	29937	1.12657	4.55158	9.69599	1.28e-11	1.72e-09	16.4618
ATP5I	207335_x_at	521	1.89656	7.18475	9.65599	1.43e-11	1.89e-09	16.3542
SNAPIN	223066_at	23557	1.41656	5.92198	9.64735	1.47e-11	1.91e-09	16.3309
CSRP2	207030_s_at	1466	1.25776	3.31694	9.6297	1.54e-11	2e-09	16.2833
LYZ	1555745_a_at	4069	3.18918	3.8433	9.60291	1.66e-11	2.1e-09	16.211
UAP1L1	214755_at	91373	1.4742	3.04471	9.59586	1.69e-11	2.11e-09	16.192
RPS17	201665_x_at	6218	1.30159	10.1158	9.59447	1.7e-11	2.11e-09	16.1883
FAM96B	218074_at	51647	1.64322	6.19077	9.58637	1.73e-11	2.15e-09	16.1664
COA4	220647_s_at	51287	1.37779	6.45025	9.56814	1.82e-11	2.22e-09	16.1171
DNPH1	204238_s_at	10591	1.22084	4.78003	9.54483	1.94e-11	2.32e-09	16.054
M6PR	200900_s_at	4074	1.71583	4.09006	9.54404	1.95e-11	2.32e-09	16.0518
C12orf57	224719_s_at	113246	1.60498	5.09292	9.53752	1.98e-11	2.35e-09	16.0342
C1orf54	219506_at	79630	2.31789	4.47603	9.53566	1.99e-11	2.35e-09	16.0291
FAM173A	219709_x_at	65990	1.56449	5.47821	9.5208	2.08e-11	2.43e-09	15.9889
TNFRSF10B	209294_x_at	8795	1.15318	4.84767	9.50857	2.15e-11	2.5e-09	15.9557
PFDN2	218336_at	5202	1.64648	5.78245	9.5053	2.17e-11	2.51e-09	15.9468
HCST	223640_at	10870	2.00951	5.64002	9.50161	2.19e-11	2.52e-09	15.9368
BLVRB	202201_at	645	1.53473	4.69837	9.46511	2.42e-11	2.73e-09	15.8376
NDUFB3	203371_s_at	4709	1.89311	5.90302	9.45834	2.47e-11	2.77e-09	15.8192
RPL11	200010_at	6135	1.26847	6.69151	9.45405	2.5e-11	2.79e-09	15.8075
C3	217767_at	718	2.58232	3.36769	9.43882	2.6e-11	2.88e-09	15.7661
TRIM47	225868_at	91107	1.65834	3.85432	9.43921	2.6e-11	2.88e-09	15.7672
CDK4	202246_s_at	1019	2.18892	5.34723	9.4367	2.62e-11	2.88e-09	15.7603
GNPDA1	202382_s_at	10007	2.4622	5.04115	9.4296	2.67e-11	2.92e-09	15.741
BTBD6	225389_at	90135	1.07578	7.96217	9.42132	2.73e-11	2.96e-09	15.7184
TNFAIP3	202643_s_at	7128	1.4689	5.36991	9.42057	2.74e-11	2.96e-09	15.7164
RPL24	200013_at	6152	1.77048	9.77127	9.407	2.84e-11	3.03e-09	15.6794
C9orf16	204480_s_at	79095	1.01357	3.66209	9.37966	3.07e-11	3.24e-09	15.6048
COX7B	202110_at	1349	1.26763	3.63817	9.36294	3.21e-11	3.37e-09	15.5591
MYEOV2	1553515_at	150678	1.27641	5.24332	9.32484	3.57e-11	3.68e-09	15.4549
CTSB	200838_at	1508	3.01002	5.1041	9.31636	3.65e-11	3.71e-09	15.4317
RBCK1	207713_s_at	10616	1.18486	6.01526	9.30678	3.75e-11	3.8e-09	15.4054
OXLD1	221797_at	339229	1.46834	6.25719	9.2878	3.96e-11	3.97e-09	15.3534
PHPT1	223207_x_at	29085	2.22266	6.68804	9.28556	3.98e-11	3.97e-09	15.3473
NDST2	1559701_s_at	8509	1.02538	4.81289	9.27588	4.09e-11	4.06e-09	15.3207
CD14	201743_at	929	3.35659	3.61829	9.26769	4.18e-11	4.12e-09	15.2982
MRPS18A	218385_at	55168	1.24637	5.75475	9.26838	4.18e-11	4.12e-09	15.3001
NFKBIE	203927_at	4794	1.65738	6.5565	9.26405	4.23e-11	4.14e-09	15.2882
TMEM147	202475_at	10430	1.78689	5.20782	9.2572	4.31e-11	4.2e-09	15.2694
PSMA7	201114_x_at	5688	1.65114	5.98576	9.25055	4.39e-11	4.26e-09	15.2511
NEDD8	201840_at	4738	1.38874	5.46661	9.23845	4.54e-11	4.39e-09	15.2179
FTH1	200748_s_at	2495	2.34393	7.7675	9.2309	4.63e-11	4.46e-09	15.1971
CHI3L1	209395_at	1116	2.49017	2.94312	9.20124	5.03e-11	4.8e-09	15.1155
RPL35	200002_at	11224	1.77464	7.95204	9.19763	5.09e-11	4.83e-09	15.1055
MTFP1	223172_s_at	51537	2.11112	6.84259	9.1701	5.49e-11	5.17e-09	15.0297
RPS18	201049_s_at	6222	1.20769	11.7038	9.14818	5.84e-11	5.47e-09	14.9692
COL4A2	211964_at	1284	1.19186	2.78421	9.13514	6.06e-11	5.65e-09	14.9331
GUK1	200075_s_at	2987	1.44144	5.42732	9.11326	6.44e-11	5.93e-09	14.8727
PHF5A	225309_at	84844	1.42623	3.38649	9.11349	6.44e-11	5.93e-09	14.8733
RNF7	218286_s_at	9616	1.30615	5.44243	9.1022	6.64e-11	6.09e-09	14.8421
PET100	226006_at	100131801	1.56331	5.82958	9.09097	6.86e-11	6.21e-09	14.811
COL6A3	201438_at	1293	2.42254	2.96272	9.08209	7.03e-11	6.32e-09	14.7864
COL1A2	202403_s_at	1278	1.46639	3.11933	9.07712	7.13e-11	6.34e-09	14.7726
GLRX2	219933_at	51022	1.69801	4.35623	9.07607	7.15e-11	6.34e-09	14.7697
FTL	212788_x_at	2512	2.54583	8.19346	9.04819	7.73e-11	6.8e-09	14.6924
RILPL2	227983_at	196383	2.26948	6.12077	9.02311	8.3e-11	7.24e-09	14.6228
NDUFA6	202000_at	4700	1.4223	6.30402	9.02134	8.34e-11	7.25e-09	14.6179
RAB20	219622_at	55647	1.19868	2.92901	9.01746	8.43e-11	7.3e-09	14.6071
RABGEF1	235407_at	27342	1.68405	4.90335	9.0152	8.48e-11	7.32e-09	14.6008
SNX11	220140_s_at	29916	1.20064	5.34015	9.00529	8.72e-11	7.49e-09	14.5733
CXCL13	205242_at	10563	3.70111	2.95809	9.00425	8.75e-11	7.49e-09	14.5704
TOMM22	217960_s_at	56993	1.44572	4.96883	8.98942	9.12e-11	7.78e-09	14.5291
NHP2	209104_s_at	55651	1.81543	7.49851	8.97747	9.44e-11	8.01e-09	14.4959
BCS1L	207618_s_at	617	1.55212	6.11324	8.94867	1.02e-10	8.59e-09	14.4157
VCAM1	203868_s_at	7412	2.41886	2.40853	8.9429	1.04e-10	8.7e-09	14.3996
COX7A1	204570_at	1346	1.26271	3.59709	8.93301	1.07e-10	8.87e-09	14.372
ROMO1	224972_at	140823	2.09709	6.29166	8.91614	1.12e-10	9.27e-09	14.3249
FXYD6	217897_at	53826	1.71418	4.20624	8.91106	1.14e-10	9.37e-09	14.3107
RPS24	1555878_at	6229	1.65972	5.10929	8.88109	1.24e-10	1.02e-08	14.227
DDRGK1	218159_at	65992	1.2492	7.02446	8.83927	1.39e-10	1.13e-08	14.11
PHB	200658_s_at	5245	1.11107	5.5171	8.83878	1.4e-10	1.13e-08	14.1086
S100A4	203186_s_at	6275	1.80338	4.21516	8.82696	1.44e-10	1.16e-08	14.0755
SNRPG	205644_s_at	6637	1.8106	8.8551	8.82147	1.47e-10	1.17e-08	14.0601
TNIP2	218335_x_at	79155	1.1678	6.8293	8.81655	1.49e-10	1.18e-08	14.0463
DPT	207977_s_at	1805	1.01693	2.62993	8.81133	1.51e-10	1.2e-08	14.0316
ACOT13	204565_at	55856	2.03028	4.59015	8.79881	1.56e-10	1.23e-08	13.9965
OST4	224637_at	100128731	1.7783	5.8459	8.79494	1.58e-10	1.24e-08	13.9857
SNAPC5	1554093_a_at	10302	1.11624	4.76587	8.7947	1.58e-10	1.24e-08	13.985
SNHG19	228049_x_at	100507303	2.43359	3.86449	8.7899	1.61e-10	1.25e-08	13.9715
CCL18	209924_at	6362	3.08133	3.507	8.78041	1.65e-10	1.28e-08	13.9449
SCARNA17	240830_at	677769	1.86262	4.29906	8.77823	1.66e-10	1.28e-08	13.9387
NDUFA11	225304_s_at	126328	1.33529	6.0516	8.77319	1.68e-10	1.3e-08	13.9246
C1QB	202953_at	713	4.35438	3.69716	8.76924	1.7e-10	1.3e-08	13.9135
SIGIRR	218921_at	59307	1.56579	4.71959	8.77004	1.7e-10	1.3e-08	13.9157
TIMM13	218188_s_at	26517	1.27934	3.95487	8.76048	1.75e-10	1.32e-08	13.8888
MRPL17	222216_s_at	63875	2.10443	5.41061	8.75521	1.77e-10	1.33e-08	13.874
MRPS28	219819_s_at	28957	1.72932	2.83927	8.74943	1.8e-10	1.34e-08	13.8578
SCARNA2	237137_at	677766	2.0577	4.16425	8.74937	1.8e-10	1.34e-08	13.8576
LGALS1	201105_at	3956	2.39667	5.40798	8.73883	1.86e-10	1.38e-08	13.8279
LEPROTL1	202594_at	23484	1.73182	4.12304	8.73432	1.88e-10	1.39e-08	13.8152
PTPRM	1555579_s_at	5797	1.09164	2.33097	8.71179	2.01e-10	1.48e-08	13.7518
POLR2I	212955_s_at	5438	2.03561	5.58023	8.70476	2.05e-10	1.5e-08	13.732
A2M	1558450_at	2	1.14718	2.75562	8.69941	2.08e-10	1.51e-08	13.7169
FAM127A	201828_x_at	8933	1.23584	5.34486	8.68722	2.15e-10	1.55e-08	13.6825
METTL1	204027_s_at	4234	1.18185	5.94525	8.66764	2.27e-10	1.63e-08	13.6273
GZMK	206666_at	3003	2.07653	3.24066	8.65811	2.34e-10	1.65e-08	13.6004
ZNF593	204175_at	51042	1.94608	5.67614	8.65797	2.34e-10	1.65e-08	13.6
RPL22L1	225541_at	200916	2.17112	7.45838	8.64219	2.45e-10	1.72e-08	13.5554
LAMB2	216264_s_at	3913	1.03528	2.81307	8.63535	2.49e-10	1.74e-08	13.5361
LOC158960	1558685_a_at	158960	1.18732	5.3029	8.6282	2.55e-10	1.77e-08	13.5159
CFD	205382_s_at	1675	2.27849	4.96516	8.62543	2.57e-10	1.78e-08	13.508
LST1	210629_x_at	7940	1.44283	4.40713	8.60819	2.7e-10	1.87e-08	13.4592
CHCHD6	224462_s_at	84303	1.37303	4.70502	8.58868	2.85e-10	1.97e-08	13.404
QDPR	209123_at	5860	1.10678	3.81384	8.55049	3.18e-10	2.16e-08	13.2957
SRI	208920_at	6717	1.10816	5.05899	8.53766	3.3e-10	2.22e-08	13.2593
TMEM160	219219_at	54958	1.16286	3.95987	8.53345	3.34e-10	2.24e-08	13.2473
MT1F	213629_x_at	4494	1.83993	4.37178	8.5189	3.48e-10	2.33e-08	13.206
CYSTM1	224707_at	84418	2.27978	4.58106	8.51786	3.5e-10	2.33e-08	13.2031
OR7E37P	217499_x_at	100506759	1.83417	6.07028	8.50998	3.58e-10	2.37e-08	13.1806
RPL30	200062_s_at	6156	1.20129	10.6577	8.49157	3.77e-10	2.47e-08	13.1283
DOK2	214054_at	9046	1.99068	5.31241	8.48499	3.84e-10	2.5e-08	13.1096
SERTAD1	223394_at	29950	1.10147	5.6318	8.4855	3.84e-10	2.5e-08	13.111
TMEM119	227300_at	338773	1.0064	2.40704	8.48349	3.86e-10	2.5e-08	13.1053
C1orf50	219406_at	79078	1.66625	5.26027	8.4796	3.9e-10	2.52e-08	13.0943
C6orf48	220755_s_at	50854	1.40633	7.38259	8.46446	4.08e-10	2.61e-08	13.0511
CYP27A1	203979_at	1593	1.86211	6.13292	8.45869	4.15e-10	2.65e-08	13.0347
NCBP2-AS2	225657_at	152217	1.44596	5.21056	8.4575	4.16e-10	2.65e-08	13.0313
NDUFB9	222992_s_at	4715	1.50976	6.96925	8.4555	4.18e-10	2.65e-08	13.0256
PIN1	202927_at	5300	1.32316	5.41117	8.44751	4.28e-10	2.69e-08	13.0028
CMC4	210212_x_at	100272147	1.61059	5.09727	8.42396	4.58e-10	2.86e-08	12.9357
SNRPD2	200826_at	6633	2.14416	7.89959	8.42423	4.58e-10	2.86e-08	12.9364
CCL4	204103_at	6351	1.6423	3.66131	8.42267	4.6e-10	2.86e-08	12.932
TRIAP1	218403_at	51499	1.66645	5.87994	8.39825	4.94e-10	3.05e-08	12.8623
MIEN1	224447_s_at	84299	1.78841	6.35223	8.37238	5.32e-10	3.26e-08	12.7884
OXNAD1	227686_at	92106	1.48645	3.66899	8.36285	5.47e-10	3.34e-08	12.7611
DCTD	201571_s_at	1635	1.7641	4.38055	8.35832	5.54e-10	3.37e-08	12.7481
NAA10	203025_at	8260	1.68447	6.08916	8.35809	5.54e-10	3.37e-08	12.7475
RPP25L	225403_at	138716	1.1742	7.11297	8.35699	5.56e-10	3.37e-08	12.7443
ZNF511	225307_at	118472	1.68549	5.72457	8.35595	5.58e-10	3.37e-08	12.7414
TYROBP	204122_at	7305	2.25641	3.52422	8.34996	5.68e-10	3.4e-08	12.7242
RALY-AS1	230294_at	101926888	1.20491	2.92739	8.34695	5.73e-10	3.42e-08	12.7156
ATP5D	203926_x_at	513	1.13758	6.62185	8.34017	5.84e-10	3.45e-08	12.6962
DBI	202428_x_at	1622	2.01116	6.01966	8.32408	6.12e-10	3.61e-08	12.6501
LOC100506100	228773_at	100506100	1.76809	4.56059	8.31868	6.22e-10	3.66e-08	12.6346
MT2A	212185_x_at	4502	2.91981	6.54744	8.30662	6.44e-10	3.77e-08	12.6001
MYO7A	208189_s_at	4647	1.13087	3.46797	8.30615	6.45e-10	3.77e-08	12.5987
PLBD1	218454_at	79887	2.38011	3.24641	8.29441	6.67e-10	3.87e-08	12.565
LAMTOR1	223009_at	55004	1.15437	5.47339	8.29143	6.73e-10	3.89e-08	12.5565
C1orf122	225480_at	127687	1.28033	6.90296	8.28875	6.78e-10	3.9e-08	12.5488
RPL10L	217559_at	140801	1.26203	3.43313	8.28875	6.78e-10	3.9e-08	12.5488
KCTD12	212188_at	115207	1.61664	2.80579	8.28169	6.92e-10	3.97e-08	12.5285
LINC00998	224723_x_at	401397	1.24454	2.26439	8.27827	6.99e-10	4e-08	12.5187
MRPL23	1562392_at	6150	1.00824	4.19591	8.27668	7.02e-10	4e-08	12.5142
SNRPF	203832_at	6636	1.12487	3.32259	8.2757	7.04e-10	4e-08	12.5114
HEBP1	218450_at	50865	1.60042	3.68388	8.26928	7.17e-10	4.06e-08	12.4929
RPP40	213427_at	10799	1.67124	3.81823	8.26656	7.23e-10	4.08e-08	12.4851
CORO1B	221754_s_at	57175	1.40335	5.55769	8.22938	8.06e-10	4.47e-08	12.3782
UBE2F	225783_at	140739	1.21479	4.0549	8.22641	8.13e-10	4.49e-08	12.3697
HAUS7	213334_x_at	55559	1.22324	3.6462	8.22509	8.16e-10	4.5e-08	12.3659
LOC101928000	236075_s_at	101928000	1.66823	5.67992	8.22112	8.25e-10	4.54e-08	12.3545
POLR2L	202586_at	5441	1.21999	5.6922	8.20774	8.58e-10	4.66e-08	12.316
LINC00115	220399_at	79854	1.57094	2.80392	8.20755	8.59e-10	4.66e-08	12.3154
TMSB10	217733_s_at	9168	1.44756	10.295	8.19447	8.92e-10	4.82e-08	12.2777
TRMT112	217774_s_at	51504	1.18367	6.02721	8.18928	9.06e-10	4.87e-08	12.2628
MPP1	202974_at	4354	1.45401	4.0002	8.18088	9.28e-10	4.94e-08	12.2386
RPL29	200823_x_at	6159	1.91681	5.8947	8.18063	9.29e-10	4.94e-08	12.2379
C17orf96	228066_at	100170841	1.08066	4.73053	8.17086	9.56e-10	5.05e-08	12.2097
IFITM1	214022_s_at	8519	2.24974	6.24631	8.16651	9.68e-10	5.09e-08	12.1972
UQCRQ	201568_at	27089	2.56862	6.75332	8.15938	9.88e-10	5.18e-08	12.1766
DECR2	219664_s_at	26063	1.28263	6.27378	8.15788	9.93e-10	5.19e-08	12.1723
PRELID1	223032_x_at	27166	1.93245	6.75644	8.14512	1.03e-09	5.35e-08	12.1355
TNFAIP2	202509_s_at	7127	1.20223	3.41853	8.13946	1.05e-09	5.41e-08	12.1191
POP7	209482_at	10248	1.99849	6.05123	8.13376	1.06e-09	5.48e-08	12.1027
HS3ST3A1	219985_at	9955	1.36048	2.23309	8.12861	1.08e-09	5.55e-08	12.0878
TMEM251	213246_at	26175	1.72618	3.67682	8.12176	1.1e-09	5.65e-08	12.068
RASGEF1A	230563_at	221002	1.21106	3.2282	8.11743	1.12e-09	5.69e-08	12.0555
TIMM10	1555764_s_at	26519	1.77321	6.00004	8.11286	1.13e-09	5.75e-08	12.0423
RPL31	200962_at	6160	1.12652	6.53478	8.10894	1.15e-09	5.81e-08	12.031
SLA	203760_s_at	6503	1.85988	5.75198	8.09965	1.18e-09	5.94e-08	12.0041
COQ4	218328_at	51117	1.18637	3.90298	8.08227	1.24e-09	6.22e-08	11.9539
FDXR	207813_s_at	2232	1.7384	3.59789	8.07783	1.25e-09	6.29e-08	11.941
COPRS	225096_at	55352	1.27262	5.96468	8.07658	1.26e-09	6.3e-08	11.9374
TMEM126A	223334_at	84233	2.0145	6.28951	8.0632	1.31e-09	6.53e-08	11.8986
PYCARD	221666_s_at	29108	1.97219	6.48824	8.05293	1.35e-09	6.7e-08	11.8689
DPM3	219373_at	54344	1.59981	5.76606	8.04924	1.36e-09	6.76e-08	11.8582
MOK	205130_at	5891	1.07918	3.05137	8.03664	1.42e-09	6.98e-08	11.8217
EBPL	223306_at	84650	1.72136	5.0959	8.02892	1.45e-09	7.11e-08	11.7993
NDUFS6	203606_at	4726	1.53679	8.62806	8.02459	1.47e-09	7.18e-08	11.7868
TMEM173	224916_at	340061	1.31854	3.03342	8.0212	1.48e-09	7.24e-08	11.7769
CD8A	205758_at	925	2.13405	3.7903	8.01242	1.52e-09	7.38e-08	11.7515
ANAPC15	204218_at	25906	1.20998	4.47847	8.01021	1.53e-09	7.4e-08	11.7451
LYRM4	218561_s_at	57128	1.27052	3.82577	8.00904	1.53e-09	7.4e-08	11.7417
CD63	200663_at	967	2.88262	5.74693	8.00011	1.58e-09	7.56e-08	11.7158
MIF	217871_s_at	4282	2.6099	5.48496	7.99754	1.59e-09	7.6e-08	11.7083
CTSK	202450_s_at	1513	1.9754	4.54134	7.99106	1.62e-09	7.72e-08	11.6895
S100A16	227998_at	140576	1.50442	4.85643	7.99141	1.62e-09	7.72e-08	11.6905
PUS3	221277_s_at	83480	1.38929	4.51398	7.98665	1.64e-09	7.8e-08	11.6767
SOD2	1566342_at	6648	2.96453	4.01306	7.96251	1.76e-09	8.32e-08	11.6065
GLUL	200648_s_at	2752	1.75328	3.85206	7.95622	1.79e-09	8.42e-08	11.5883
GZMA	205488_at	3001	2.39127	2.77988	7.94961	1.83e-09	8.55e-08	11.569
RPL14	200074_s_at	9045	1.13127	7.7133	7.94203	1.87e-09	8.68e-08	11.547
TRAPPC5	225870_s_at	126003	1.40795	6.63556	7.93561	1.9e-09	8.83e-08	11.5283
HTRA1	201185_at	5654	1.72171	4.25164	7.92533	1.96e-09	9.06e-08	11.4984
IFITM2	201315_x_at	10581	2.08452	6.21919	7.92225	1.98e-09	9.09e-08	11.4894
CXCL12	203666_at	6387	1.32776	2.88201	7.91273	2.04e-09	9.26e-08	11.4617
TLR2	204924_at	7097	1.6193	4.03788	7.90927	2.06e-09	9.32e-08	11.4516
COX16	223191_at	51241	1.74268	5.03289	7.90063	2.11e-09	9.55e-08	11.4265
JDP2	226267_at	122953	1.03181	2.98047	7.89657	2.14e-09	9.64e-08	11.4146
RNF181	223064_at	51255	1.29908	5.02471	7.88798	2.19e-09	9.87e-08	11.3896
CPNE2	225129_at	221184	1.46193	2.56399	7.88606	2.2e-09	9.9e-08	11.384
ITPRIPL1	240037_at	150771	1.19378	3.00712	7.86126	2.37e-09	1.06e-07	11.3117
STOM	201060_x_at	2040	1.69558	3.4243	7.86057	2.38e-09	1.06e-07	11.3096
NOL12	219324_at	79159	1.11647	4.26189	7.8532	2.43e-09	1.08e-07	11.2882
GRPEL1	212432_at	80273	1.31651	5.87557	7.84739	2.47e-09	1.09e-07	11.2712
AIF1	207823_s_at	199	1.06905	3.69509	7.84386	2.5e-09	1.1e-07	11.2609
TMEM176A	218345_at	55365	1.68464	3.21329	7.83936	2.53e-09	1.11e-07	11.2477
CSRP1	200621_at	1465	1.26079	5.16146	7.83816	2.54e-09	1.11e-07	11.2442
MRPL52	221997_s_at	122704	1.04196	4.93745	7.83612	2.55e-09	1.12e-07	11.2383
TIMP1	201666_at	7076	2.7873	3.90416	7.83536	2.56e-09	1.12e-07	11.2361
KIF9	223778_at	64147	1.0314	3.53093	7.8243	2.65e-09	1.15e-07	11.2038
LAGE3	219061_s_at	8270	1.75608	6.30382	7.81054	2.76e-09	1.19e-07	11.1635
RPL39	208695_s_at	6170	1.08514	11.4654	7.79416	2.89e-09	1.24e-07	11.1156
RPS19BP1	225148_at	91582	1.46985	6.70039	7.79191	2.91e-09	1.24e-07	11.1091
SAT1	203455_s_at	6303	1.68613	6.97969	7.78568	2.97e-09	1.26e-07	11.0908
NUP50-AS1	240233_at	100506714	1.30061	3.50156	7.78094	3.01e-09	1.28e-07	11.077
RNASEH2C	226453_at	84153	1.08614	6.76789	7.77897	3.03e-09	1.28e-07	11.0712
ZNRF1	223382_s_at	84937	1.29516	3.12037	7.77139	3.09e-09	1.31e-07	11.049
MRPL47	223480_s_at	57129	1.0296	4.64382	7.76628	3.14e-09	1.32e-07	11.0341
NDUFC1	203478_at	4717	1.15534	4.16768	7.74797	3.32e-09	1.39e-07	10.9804
SCO2	205241_at	9997	2.09028	6.7754	7.74548	3.34e-09	1.4e-07	10.9731
SDHAF1	221855_at	644096	1.09585	5.93116	7.74459	3.35e-09	1.4e-07	10.9705
SNF8	218391_at	11267	1.0744	6.27177	7.74227	3.37e-09	1.4e-07	10.9637
TMA7	221791_s_at	51372	1.26291	10.681	7.72603	3.54e-09	1.46e-07	10.9161
NTPCR	223272_s_at	84284	1.41947	4.41069	7.717	3.64e-09	1.49e-07	10.8897
PRR34-AS1	238058_at	150381	1.41926	5.55773	7.71682	3.64e-09	1.49e-07	10.8891
IL4I1	230966_at	259307	2.18831	5.08667	7.71344	3.67e-09	1.5e-07	10.8792
PSMG3	223363_at	84262	1.2837	5.20744	7.71168	3.69e-09	1.5e-07	10.874
BZW2	217809_at	28969	1.86412	6.23404	7.70378	3.78e-09	1.53e-07	10.8509
MRPL34	221692_s_at	64981	1.12873	3.44837	7.69499	3.88e-09	1.57e-07	10.8251
TNFRSF1A	207643_s_at	7132	1.47188	3.72382	7.69274	3.91e-09	1.58e-07	10.8185
MXRA5	209596_at	25878	1.90291	2.63464	7.68721	3.97e-09	1.6e-07	10.8022
CENPW	226936_at	387103	1.66318	4.69377	7.68016	4.06e-09	1.62e-07	10.7815
CCDC86	203119_at	79080	1.63716	5.60336	7.67254	4.15e-09	1.65e-07	10.7591
NSDHL	209279_s_at	50814	1.24007	4.43247	7.65764	4.34e-09	1.72e-07	10.7154
LOC100289098	239896_at	100289098	1.70356	4.43027	7.65487	4.37e-09	1.73e-07	10.7072
RPS5	200024_at	6193	1.21476	8.98604	7.65132	4.42e-09	1.75e-07	10.6968
RPL27A	212044_s_at	6157	1.80156	7.92791	7.64591	4.49e-09	1.77e-07	10.6809
A1BG	229819_at	1	1.02737	2.37495	7.64553	4.5e-09	1.77e-07	10.6797
PFDN5	207132_x_at	5204	1.02677	4.93289	7.64512	4.5e-09	1.77e-07	10.6785
TMEM99	226565_at	147184	1.74756	5.73059	7.64475	4.51e-09	1.77e-07	10.6775
SCAND1	218206_x_at	51282	1.16176	4.79308	7.63671	4.62e-09	1.8e-07	10.6538
FUCA1	202838_at	2517	1.33314	4.14633	7.60871	5.02e-09	1.94e-07	10.5714
NECAP2	220731_s_at	55707	1.12481	6.3311	7.60597	5.06e-09	1.96e-07	10.5633
KLHDC8B	225755_at	200942	1.35654	4.23564	7.60118	5.13e-09	1.97e-07	10.5493
UBL5	218011_at	59286	1.49555	7.26214	7.60114	5.13e-09	1.97e-07	10.5491
SUMF2	225002_s_at	25870	1.05699	4.01039	7.59514	5.22e-09	2.01e-07	10.5315
TARBP2	203677_s_at	6895	1.28139	5.4051	7.58755	5.34e-09	2.04e-07	10.5091
IL2RA	206341_at	3559	1.2048	2.86606	7.58725	5.35e-09	2.04e-07	10.5082
FPR1	205118_at	2357	1.09838	2.89612	7.58046	5.46e-09	2.07e-07	10.4882
COX6B1	201441_at	1340	1.69896	6.2057	7.57534	5.54e-09	2.09e-07	10.4731
LOC102724782	244765_at	102724782	1.7805	4.36758	7.57329	5.58e-09	2.1e-07	10.4671
SHFM1	202276_at	7979	1.73698	5.15362	7.56572	5.7e-09	2.14e-07	10.4448
PPAP2B	209355_s_at	8613	1.54463	3.31349	7.54909	5.99e-09	2.23e-07	10.3957
CETP	206210_s_at	1071	1.79381	2.55111	7.54468	6.07e-09	2.25e-07	10.3827
COMMD9	218072_at	29099	1.66046	4.65543	7.52077	6.52e-09	2.41e-07	10.3122
ZNF213-AS1	222170_at	100507458	1.11256	2.37134	7.51876	6.56e-09	2.42e-07	10.3062
HMOX1	203665_at	3162	1.00438	2.94881	7.51381	6.66e-09	2.44e-07	10.2916
MT1X	204326_x_at	4501	2.50577	4.61395	7.50525	6.83e-09	2.49e-07	10.2663
COA6	225638_at	388753	1.68521	5.31268	7.49591	7.03e-09	2.55e-07	10.2387
LINC00493	226236_at	388789	1.36511	4.45596	7.49524	7.04e-09	2.55e-07	10.2367
LAG3	206486_at	3902	1.90767	3.56049	7.47155	7.56e-09	2.72e-07	10.1667
C1orf123	203197_s_at	54987	1.00025	4.89475	7.47008	7.59e-09	2.73e-07	10.1623
TXNDC17	224511_s_at	84817	1.31393	4.21171	7.46099	7.8e-09	2.8e-07	10.1355
DPH3	225195_at	285381	1.70666	3.64963	7.45468	7.95e-09	2.84e-07	10.1168
LOC100289230	238456_at	100289230	1.45753	2.70703	7.45077	8.04e-09	2.87e-07	10.1052
CD2	205831_at	914	2.73991	3.74683	7.44646	8.15e-09	2.9e-07	10.0925
HINT2	224415_s_at	84681	1.59549	6.398	7.44225	8.25e-09	2.93e-07	10.08
DIABLO	219350_s_at	56616	1.12028	5.16138	7.41177	9.04e-09	3.16e-07	9.98975
PTRH2	218732_at	51651	1.65992	6.15154	7.41171	9.04e-09	3.16e-07	9.98957
POLR1C	207515_s_at	9533	1.02364	5.05216	7.40798	9.14e-09	3.18e-07	9.97853
TCEB2	200085_s_at	6923	1.14018	6.4303	7.40746	9.16e-09	3.18e-07	9.97699
SNRPC	201342_at	6631	1.03894	5.74745	7.40561	9.21e-09	3.19e-07	9.97149
LAMTOR4	224890_s_at	389541	1.03891	6.67563	7.39815	9.42e-09	3.25e-07	9.94939
PSMB4	202243_s_at	5692	1.75774	6.39272	7.38533	9.79e-09	3.35e-07	9.91137
MRPL36	224331_s_at	64979	1.68339	7.87932	7.37042	1.02e-08	3.48e-07	9.86717
GYG1	201554_x_at	2992	1.39443	5.3713	7.36068	1.05e-08	3.55e-07	9.83827
STOML2	215416_s_at	30968	1.44381	3.93618	7.35818	1.06e-08	3.58e-07	9.83085
YDJC	227042_at	150223	1.31072	5.74182	7.35674	1.07e-08	3.59e-07	9.82657
MGST2	204168_at	4258	1.3305	5.84106	7.33685	1.13e-08	3.79e-07	9.76751
GIMAP1	1552315_at	170575	1.14009	3.12139	7.33119	1.15e-08	3.85e-07	9.75072
VAMP5	204929_s_at	10791	1.55069	4.05928	7.32901	1.16e-08	3.86e-07	9.74424
IGSF6	206420_at	10261	1.78003	2.18957	7.32508	1.17e-08	3.9e-07	9.73256
NDUFA13	220864_s_at	51079	2.00727	6.5458	7.32069	1.19e-08	3.95e-07	9.71951
FDX1L	226451_at	112812	1.287	4.59047	7.31552	1.21e-08	4e-07	9.70415
FABP5	202345_s_at	2171	2.11233	5.17277	7.31046	1.23e-08	4.05e-07	9.68911
NFKBIZ	223217_s_at	64332	1.74063	5.83116	7.29484	1.28e-08	4.22e-07	9.64266
ZCRB1	225394_s_at	85437	1.41131	5.38662	7.29559	1.28e-08	4.22e-07	9.64489
TMEM258	218213_s_at	746	2.30105	8.00612	7.2908	1.3e-08	4.27e-07	9.63066
MRPL11	219162_s_at	65003	1.68185	5.33433	7.28583	1.32e-08	4.32e-07	9.61588
GGCT	215380_s_at	79017	1.24376	6.07155	7.26984	1.38e-08	4.49e-07	9.5683
SEPP1	201427_s_at	6414	1.38337	2.17673	7.27145	1.38e-08	4.48e-07	9.57309
MPND	233651_s_at	84954	1.06418	3.31101	7.26946	1.39e-08	4.49e-07	9.56719
VPS25	224608_s_at	84313	1.02995	4.96901	7.26624	1.4e-08	4.52e-07	9.55759
C12orf73	226927_at	728568	1.04494	4.01775	7.25595	1.44e-08	4.65e-07	9.52698
CYB5R2	220230_s_at	51700	2.33928	2.88922	7.25246	1.46e-08	4.67e-07	9.51658
ZPR1	200054_at	8882	1.13846	6.09631	7.25316	1.46e-08	4.67e-07	9.51867
MRPL4	218105_s_at	51073	1.0596	4.23498	7.23704	1.53e-08	4.84e-07	9.47067
MALSU1	226385_s_at	115416	1.16164	5.23358	7.23384	1.54e-08	4.86e-07	9.46114
RGS10	204316_at	6001	1.8226	4.62875	7.23552	1.54e-08	4.85e-07	9.46615
GYPC	202947_s_at	2995	1.011	3.83153	7.23218	1.55e-08	4.87e-07	9.45618
PLA2G2D	220423_at	26279	1.75069	4.70545	7.21715	1.62e-08	5.08e-07	9.4114
RUSC1	206949_s_at	23623	1.22189	5.47422	7.20189	1.7e-08	5.29e-07	9.36591
NGFRAP1	217963_s_at	27018	3.06626	6.60992	7.19823	1.72e-08	5.32e-07	9.35501
MLST8	220587_s_at	64223	1.07081	4.93667	7.19323	1.74e-08	5.39e-07	9.34009
GTSF1	227711_at	121355	2.39189	3.93819	7.19239	1.75e-08	5.4e-07	9.33758
CMC1	228283_at	152100	2.13989	4.57898	7.1876	1.77e-08	5.46e-07	9.32331
ASH1L-AS1	1554057_at	645676	1.51603	4.81936	7.18332	1.8e-08	5.51e-07	9.31053
RP11-54K16.2	222338_x_at		1.23111	4.56708	7.17216	1.86e-08	5.68e-07	9.27724
IFRD2	209100_at	7866	1.4243	5.30663	7.16401	1.91e-08	5.81e-07	9.25293
FOXC1	1553613_s_at	2296	1.69871	3.30033	7.1579	1.94e-08	5.91e-07	9.23469
ZAP70	1555613_a_at	7535	1.17153	4.17922	7.14375	2.03e-08	6.14e-07	9.19244
AOAH	205639_at	313	1.24062	4.37858	7.13494	2.08e-08	6.28e-07	9.16613
MRPL54	225797_at	116541	1.11352	5.11934	7.13353	2.09e-08	6.29e-07	9.16192
PARK7	200006_at	11315	1.14589	10.1651	7.13086	2.11e-08	6.34e-07	9.15396
FN1	1558199_at	2335	1.82604	2.96583	7.12586	2.14e-08	6.41e-07	9.13901
TMEM216	223305_at	51259	1.06779	5.84294	7.12443	2.15e-08	6.43e-07	9.13474
BATF3	220358_at	55509	2.4747	4.24398	7.12277	2.16e-08	6.45e-07	9.12978
EMC6	221255_s_at	83460	1.15931	4.58719	7.11744	2.19e-08	6.53e-07	9.11384
MT1H	206461_x_at	4496	2.59807	4.56911	7.112	2.23e-08	6.62e-07	9.0976
CNRIP1	226751_at	25927	1.06448	2.52566	7.10702	2.26e-08	6.7e-07	9.08272
BCL2A1	205681_at	597	2.50649	2.99586	7.10669	2.27e-08	6.7e-07	9.08172
IL18	206295_at	3606	1.2859	2.20849	7.10456	2.28e-08	6.74e-07	9.07534
NDUFA4	217773_s_at	4697	2.06148	6.85196	7.10145	2.3e-08	6.78e-07	9.06606
SRGN	1554676_at	5552	1.30829	4.13268	7.10149	2.3e-08	6.78e-07	9.06618
TOMM40L	226059_at	84134	1.15175	3.65384	7.09635	2.34e-08	6.88e-07	9.05081
TBCA	203667_at	6902	1.2862	7.67957	7.09386	2.36e-08	6.92e-07	9.04337
GZMB	210164_at	3002	3.11647	4.19009	7.09201	2.37e-08	6.95e-07	9.03783
C1QA	218232_at	712	2.35786	3.50198	7.0864	2.41e-08	7.05e-07	9.02104
LOC101929243	229444_at	101929243	2.00462	5.40961	7.07591	2.49e-08	7.25e-07	8.98967
HDDC3	227008_at	374659	1.20682	5.73584	7.07327	2.51e-08	7.3e-07	8.98178
SMCO4	219806_s_at	56935	2.71441	5.24466	7.06948	2.54e-08	7.36e-07	8.97045
ID2	201565_s_at	3398	1.87697	2.62922	7.06244	2.59e-08	7.5e-07	8.94938
MEA1	218061_at	4201	1.37799	7.50501	7.0628	2.59e-08	7.5e-07	8.95045
DNAJC5B	1554258_a_at	85479	1.31483	3.32844	7.06137	2.6e-08	7.51e-07	8.94618
DESI1	212527_at	27351	1.04226	3.88307	7.05082	2.68e-08	7.7e-07	8.9146
COMTD1	226870_at	118881	1.22548	5.72497	7.0429	2.75e-08	7.88e-07	8.89087
HCK	208018_s_at	3055	1.34022	2.85882	7.03999	2.77e-08	7.92e-07	8.88218
MAPKAPK3	202787_s_at	7867	1.37676	5.27852	7.03818	2.79e-08	7.96e-07	8.87675
CHCHD2	217720_at	51142	1.34197	6.84301	7.03718	2.8e-08	7.96e-07	8.87375
RARRES1	206391_at	5918	1.56961	2.86002	7.03192	2.84e-08	8.07e-07	8.85801
POP5	204839_at	51367	1.48894	5.66009	7.02707	2.88e-08	8.1e-07	8.84349
STRA13	209478_at	201254	1.40911	5.74122	7.02812	2.88e-08	8.1e-07	8.84662
GTF3C6	225083_at	112495	1.76387	6.84666	7.02674	2.89e-08	8.1e-07	8.84249
MRPS33	218654_s_at	51650	1.79968	4.10133	7.02681	2.89e-08	8.1e-07	8.8427
FAM195A	1553715_s_at	84331	1.5207	4.61949	7.02389	2.91e-08	8.15e-07	8.83395
CLPP	202799_at	8192	1.4216	5.24775	7.01337	3.01e-08	8.38e-07	8.80243
NUDT1	204766_s_at	4521	2.18147	5.66097	7.00845	3.05e-08	8.46e-07	8.78769
SMIM3	223276_at	85027	1.01521	2.7926	7.00889	3.05e-08	8.46e-07	8.78902
TIFAB	236673_at	497189	1.42844	4.84251	7.00165	3.12e-08	8.62e-07	8.76731
MRTO4	220688_s_at	51154	1.39908	5.00921	6.99037	3.22e-08	8.9e-07	8.73348
CHST7	206756_at	56548	1.55529	3.07821	6.98598	3.27e-08	9e-07	8.72034
NDUFA12	223244_s_at	55967	1.89607	7.21722	6.98351	3.29e-08	9.05e-07	8.71292
EPAS1	200878_at	2034	1.14477	2.72036	6.97675	3.36e-08	9.21e-07	8.69265
CRTAM	206914_at	56253	1.98652	2.48194	6.97188	3.41e-08	9.33e-07	8.67804
PMF1	202337_at	11243	1.15068	5.22818	6.9723	3.41e-08	9.33e-07	8.67931
PEBP1	205353_s_at	5037	1.06182	5.59511	6.96524	3.48e-08	9.49e-07	8.65813
NKG7	213915_at	4818	1.77114	4.28244	6.95378	3.6e-08	9.75e-07	8.62375
CWC15	223067_at	51503	1.44656	5.31354	6.95175	3.63e-08	9.8e-07	8.61765
FCER1G	1554899_s_at	2207	1.18339	2.49496	6.94868	3.66e-08	9.88e-07	8.60844
MICA	205904_at	100507436	1.27207	4.04492	6.94343	3.72e-08	1e-06	8.59268
CMSS1	224523_s_at	84319	1.68921	5.43002	6.93732	3.79e-08	1.02e-06	8.57433
DYNLT1	201999_s_at	6993	1.48637	6.85607	6.92577	3.92e-08	1.05e-06	8.53967
BAK1	203728_at	578	1.02579	4.03935	6.92411	3.94e-08	1.05e-06	8.53467
EXOSC5	218481_at	56915	1.3407	4.89273	6.92138	3.98e-08	1.06e-06	8.5265
CERS2	222212_s_at	29956	1.24138	5.53372	6.91821	4.02e-08	1.07e-06	8.51697
ORMDL2	218556_at	29095	1.59854	5.0067	6.91523	4.05e-08	1.07e-06	8.50802
CMC2	218447_at	56942	2.02977	6.13247	6.9032	4.2e-08	1.11e-06	8.47188
SLC26A11	226679_at	284129	1.5272	5.87489	6.89239	4.34e-08	1.14e-06	8.43939
ACKR1	208335_s_at	2532	1.13457	3.76498	6.89217	4.35e-08	1.14e-06	8.43875
FKBP9	212169_at	11328	1.2627	3.91957	6.88918	4.39e-08	1.15e-06	8.42977
HCP5	206082_at	10866	2.05224	5.92395	6.88026	4.51e-08	1.18e-06	8.40294
FAM50A	203262_s_at	9130	1.22573	6.40933	6.8767	4.56e-08	1.19e-06	8.39224
STAP2	221610_s_at	55620	1.13278	3.46544	6.8678	4.68e-08	1.21e-06	8.36548
NMRAL1	223206_s_at	57407	1.35879	5.95621	6.86445	4.73e-08	1.22e-06	8.35541
MRPS21	222997_s_at	54460	1.17498	7.28247	6.85627	4.85e-08	1.25e-06	8.33082
IFITM3	212203_x_at	10410	1.07058	5.30288	6.84899	4.96e-08	1.27e-06	8.30891
COMMD1	226024_at	150684	1.66368	5.26985	6.84732	4.98e-08	1.28e-06	8.3039
VMP1	1569003_at	81671	1.28103	4.74537	6.84057	5.09e-08	1.3e-06	8.28359
MREG	219648_at	55686	1.27234	3.60298	6.83841	5.12e-08	1.31e-06	8.2771
IL10	207433_at	3586	1.25277	2.73353	6.83665	5.15e-08	1.32e-06	8.2718
ALKBH6	225969_at	84964	1.10148	5.26889	6.82605	5.32e-08	1.35e-06	8.2399
C12orf45	226349_at	121053	1.01478	3.1041	6.82566	5.32e-08	1.35e-06	8.23872
APOO	221620_s_at	79135	1.36612	3.82188	6.82379	5.35e-08	1.36e-06	8.23309
COX6A1	200925_at	1337	1.05957	4.97648	6.82328	5.36e-08	1.36e-06	8.23156
STARD3NL	223065_s_at	83930	1.00341	5.75952	6.82264	5.37e-08	1.36e-06	8.22965
SEC61G	203484_at	23480	1.3741	5.03496	6.81574	5.49e-08	1.38e-06	8.20888
BANF1	210125_s_at	8815	1.52297	4.49148	6.80954	5.59e-08	1.4e-06	8.19021
SLC25A26	225862_at	115286	1.09998	5.58619	6.80509	5.67e-08	1.42e-06	8.1768
DDIT4	202887_s_at	54541	2.17475	5.59917	6.80465	5.68e-08	1.42e-06	8.17549
PLGRKT	218992_at	55848	1.73543	4.6238	6.80269	5.71e-08	1.43e-06	8.16958
SNRPD3	202567_at	6634	1.53434	5.99133	6.80267	5.71e-08	1.43e-06	8.16953
TCEB1	202823_at	6921	1.35245	4.39699	6.80115	5.74e-08	1.43e-06	8.16495
SOD1	200642_at	6647	1.63139	6.92335	6.79627	5.82e-08	1.45e-06	8.15025
COX7A2	201597_at	1347	1.7187	8.77456	6.79536	5.84e-08	1.45e-06	8.14751
CREG1	201200_at	8804	2.54017	5.07695	6.77752	6.16e-08	1.52e-06	8.09379
CFP	206380_s_at	5199	1.0438	3.27622	6.77643	6.19e-08	1.52e-06	8.09049
C1orf216	212791_at	127703	1.14599	3.82933	6.77083	6.29e-08	1.54e-06	8.07364
C1orf213	229086_at	148898	1.30124	4.78684	6.76978	6.31e-08	1.55e-06	8.07047
SSNA1	210378_s_at	8636	1.08878	6.48129	6.76498	6.41e-08	1.57e-06	8.05599
NR2C2AP	226839_at	126382	1.04442	5.46267	6.76252	6.45e-08	1.58e-06	8.04858
SECTM1	213716_s_at	6398	1.36868	4.26442	6.75824	6.54e-08	1.59e-06	8.03569
NPL	221210_s_at	80896	1.1284	3.48238	6.75732	6.56e-08	1.59e-06	8.0329
MRPL43	224332_s_at	84545	1.01377	4.57915	6.75245	6.66e-08	1.61e-06	8.01824
CD163	203645_s_at	9332	1.86446	2.91238	6.75012	6.7e-08	1.62e-06	8.01122
RNMTL1	218993_at	55178	1.33955	6.32147	6.74725	6.76e-08	1.63e-06	8.00256
CYC1	201066_at	1537	1.28335	6.51752	6.73993	6.91e-08	1.66e-06	7.9805
TRAPPC3	203511_s_at	27095	1.18727	5.46609	6.73523	7.01e-08	1.68e-06	7.96633
TMEM106C	201764_at	79022	1.05424	4.85472	6.73459	7.03e-08	1.68e-06	7.9644
S100A11	200660_at	6282	2.29274	3.55412	6.7338	7.05e-08	1.68e-06	7.96202
CTB-31O20.2	230304_at		1.3007	6.44681	6.72715	7.19e-08	1.71e-06	7.94196
LINC01003	235174_s_at	100128822	1.6688	5.01217	6.71928	7.37e-08	1.75e-06	7.91822
NOSIP	217950_at	51070	1.33295	7.12998	6.71898	7.37e-08	1.75e-06	7.91733
TTLL12	1552257_a_at	23170	1.21854	4.63756	6.71588	7.44e-08	1.76e-06	7.90798
TRIP6	209129_at	7205	1.07017	4.79356	6.70776	7.63e-08	1.8e-06	7.88347
IPO4	218305_at	79711	1.58924	5.33436	6.69912	7.83e-08	1.84e-06	7.85741
NDUFB11	218320_s_at	54539	1.45498	6.6203	6.6974	7.87e-08	1.84e-06	7.85222
WDR54	225898_at	84058	1.28953	5.46668	6.69425	7.95e-08	1.86e-06	7.84272
HIST1H2AJ	208583_x_at	8331	1.3151	4.20502	6.6913	8.02e-08	1.87e-06	7.83383
TMEM14C	223106_at	51522	1.81963	5.5078	6.68467	8.19e-08	1.9e-06	7.81382
LSM7	204559_s_at	51690	1.50874	5.16353	6.6734	8.47e-08	1.95e-06	7.7798
DPP3	218567_x_at	10072	1.2145	5.29579	6.66587	8.67e-08	1.99e-06	7.75705
UBASH3A	220418_at	53347	1.49854	2.95872	6.66554	8.68e-08	1.99e-06	7.75606
RRAGD	221523_s_at	58528	1.05555	2.60581	6.6653	8.69e-08	1.99e-06	7.75535
CLU	1559228_at	1191	1.69469	3.2985	6.6574	8.9e-08	2.04e-06	7.73149
LSM1	203534_at	27257	1.40408	5.51201	6.64768	9.17e-08	2.09e-06	7.70214
PGLS	1554316_at	25796	1.23769	5.22312	6.63817	9.44e-08	2.15e-06	7.67341
TSPO	202096_s_at	706	1.4001	5.92523	6.63714	9.47e-08	2.15e-06	7.67031
C11orf83	229099_at	790955	1.4464	6.3212	6.62477	9.83e-08	2.23e-06	7.63293
APOA1BP	225427_s_at	128240	1.41222	4.48401	6.60015	1.06e-07	2.38e-06	7.55854
NMB	205204_at	4828	1.37803	4.15676	6.60177	1.06e-07	2.38e-06	7.56343
HIST1H4J	214463_x_at	8363	1.35607	3.58107	6.59129	1.09e-07	2.44e-06	7.53174
DCTPP1	218069_at	79077	1.37474	7.56297	6.58326	1.12e-07	2.49e-06	7.50747
NDUFB10	223112_s_at	4716	1.28872	5.65995	6.58174	1.12e-07	2.5e-06	7.50289
LOC101927752	227092_at	101927752	1.02053	3.52043	6.58016	1.13e-07	2.51e-06	7.4981
TMSB4X	216438_s_at	7114	2.15317	6.51824	6.58062	1.13e-07	2.51e-06	7.4995
IER3	201631_s_at	8870	1.38614	4.4175	6.57788	1.14e-07	2.52e-06	7.49121
MRPL22	218339_at	29093	1.33959	4.31086	6.57342	1.15e-07	2.55e-06	7.47771
KLHDC9	227582_at	126823	1.62437	4.4878	6.56279	1.19e-07	2.63e-06	7.44558
CD59	200983_x_at	966	1.19918	3.86466	6.56044	1.2e-07	2.64e-06	7.43847
C19orf24	221587_s_at	55009	1.06218	5.08052	6.54787	1.24e-07	2.74e-06	7.40043
NDUFA8	218160_at	4702	1.68615	4.89782	6.53886	1.28e-07	2.82e-06	7.37318
GLA	214430_at	2717	1.48232	5.68047	6.52604	1.33e-07	2.91e-06	7.3344
CCDC59	218936_s_at	29080	1.21266	4.9684	6.52203	1.35e-07	2.95e-06	7.32226
SRA1	224130_s_at	10011	1.26391	5.65403	6.51185	1.39e-07	3.03e-06	7.29145
NUDT15	219347_at	55270	1.26622	2.90681	6.50547	1.42e-07	3.09e-06	7.27214
NME1	201577_at	4830	1.99772	4.99221	6.4835	1.52e-07	3.27e-06	7.20562
SLC22A18	204981_at	5002	1.4136	4.5228	6.48037	1.53e-07	3.3e-06	7.19614
CDK2AP1	201938_at	8099	2.29212	6.27526	6.47934	1.54e-07	3.31e-06	7.19302
DLEU1	205677_s_at	10301	1.03676	4.60388	6.47811	1.54e-07	3.31e-06	7.18928
RP4-595K12.1	216570_x_at		1.09149	3.99259	6.47834	1.54e-07	3.31e-06	7.19
LINC00116	228614_at	205251	1.11136	2.78552	6.46731	1.59e-07	3.41e-06	7.15659
MMP12	204580_at	4321	2.3907	2.55227	6.46255	1.62e-07	3.45e-06	7.14215
TMEM14B	221452_s_at	81853	1.47165	6.30117	6.46197	1.62e-07	3.46e-06	7.1404
CCR1	205098_at	1230	1.47234	2.82034	6.45769	1.64e-07	3.49e-06	7.12743
TNFSF13B	223501_at	10673	1.7441	3.72676	6.45147	1.67e-07	3.55e-06	7.10859
SULF2	224724_at	55959	1.05831	2.72992	6.44993	1.68e-07	3.56e-06	7.10395
MTX1	210386_s_at	4580	1.35487	6.65284	6.44312	1.72e-07	3.63e-06	7.0833
LOC101928963	235607_at	101928963	1.25085	3.21654	6.43869	1.74e-07	3.68e-06	7.06988
C1orf85	1558692_at	112770	1.01513	3.07392	6.43641	1.75e-07	3.7e-06	7.06298
MRPL27	224330_s_at	51264	1.0801	5.68108	6.43467	1.76e-07	3.71e-06	7.05771
PHF19	225533_at	26147	1.66613	5.5789	6.42999	1.79e-07	3.76e-06	7.04352
ZFAS1	224915_x_at	441951	1.28506	5.63041	6.40445	1.93e-07	4.01e-06	6.96612
FAM57A	218898_at	79850	1.21209	3.18851	6.40262	1.94e-07	4.02e-06	6.96056
TMED1	203679_at	11018	1.05487	5.7579	6.3926	2.01e-07	4.14e-06	6.93019
C19orf60	218958_at	55049	1.0843	6.54118	6.38798	2.03e-07	4.2e-06	6.91619
TGFBI	201506_at	7045	2.19111	4.48262	6.38709	2.04e-07	4.21e-06	6.91349
TLCD1	227804_at	116238	1.10979	3.19893	6.38607	2.05e-07	4.22e-06	6.9104
CTC-425F1.4	212952_at		1.20105	6.67602	6.37435	2.12e-07	4.35e-06	6.87484
ERH	200043_at	2079	1.88147	5.33702	6.37371	2.13e-07	4.36e-06	6.87292
SLC25A19	223222_at	60386	1.37561	7.02232	6.36831	2.16e-07	4.41e-06	6.85652
SSSCA1	203114_at	10534	1.20564	4.06171	6.36799	2.16e-07	4.41e-06	6.85555
PSMB6	208827_at	5694	1.24667	7.58195	6.35893	2.22e-07	4.52e-06	6.8281
FIBP	202041_s_at	9158	1.43901	6.4716	6.35819	2.23e-07	4.52e-06	6.82584
SARNP	224914_s_at	84324	1.3022	4.39018	6.34586	2.32e-07	4.68e-06	6.78844
ALKBH2	225625_at	121642	1.54799	4.18646	6.33054	2.43e-07	4.87e-06	6.74197
TUBG1	201714_at	7283	1.66736	3.64344	6.32403	2.48e-07	4.95e-06	6.7222
NDUFS3	201740_at	4722	1.13639	4.0837	6.32068	2.5e-07	5e-06	6.71204
LSM5	202903_at	23658	1.20366	2.90889	6.31054	2.58e-07	5.13e-06	6.68127
SGPP2	238567_at	130367	1.08325	2.78504	6.30829	2.6e-07	5.15e-06	6.67445
RPL8	200936_at	6132	1.09346	8.66187	6.306	2.62e-07	5.17e-06	6.66751
SF3B5	221263_s_at	83443	1.59929	6.71146	6.30509	2.62e-07	5.18e-06	6.66474
LOC400043	226582_at	400043	1.53342	2.68631	6.29714	2.69e-07	5.29e-06	6.64062
TRPT1	223436_s_at	83707	1.03316	5.12948	6.2751	2.88e-07	5.62e-06	6.57371
GAR1	219110_at	54433	1.32002	5.76815	6.26746	2.95e-07	5.73e-06	6.55051
IFI27L1	230172_at	122509	1.5712	6.18353	6.25281	3.08e-07	5.97e-06	6.50604
ISCA2	226007_at	122961	1.11894	6.54904	6.25179	3.09e-07	5.97e-06	6.50292
FDCSP	229152_at	260436	2.88978	3.22914	6.25064	3.1e-07	5.99e-06	6.49946
PSMB10	202659_at	5699	1.21373	6.32219	6.21136	3.5e-07	6.67e-06	6.38015
LOC101927974	228753_at	101927974	1.16476	4.30258	6.2004	3.62e-07	6.87e-06	6.34686
SERPING1	200986_at	710	2.26486	3.24913	6.20013	3.63e-07	6.87e-06	6.34604
RILPL1	226207_at	353116	1.50521	3.56229	6.19847	3.65e-07	6.9e-06	6.341
CD274	223834_at	29126	1.06042	2.92081	6.195	3.68e-07	6.97e-06	6.33045
RPS3	208692_at	6188	1.12837	10.6021	6.17877	3.87e-07	7.25e-06	6.28116
GJA1	201667_at	2697	1.59082	2.025	6.16128	4.09e-07	7.56e-06	6.22801
NME3	204862_s_at	4832	1.23592	5.40727	6.16054	4.1e-07	7.56e-06	6.22576
GIMAP6	219777_at	474344	1.63054	2.66857	6.15332	4.19e-07	7.7e-06	6.20383
LOC100505622	243961_at	100505622	1.51822	3.64327	6.14228	4.34e-07	7.92e-06	6.17026
CUEDC2	218097_s_at	79004	1.39939	6.79337	6.14036	4.36e-07	7.96e-06	6.16445
RPL36AL	207585_s_at	6166	1.34054	6.70869	6.13142	4.48e-07	8.15e-06	6.13727
RRP7A	202937_x_at	27341	1.06688	5.2687	6.12924	4.51e-07	8.19e-06	6.13063
ETHE1	204034_at	23474	1.41606	4.05939	6.12867	4.52e-07	8.19e-06	6.12892
FKBP1B	206857_s_at	2281	1.47233	2.74876	6.12646	4.55e-07	8.22e-06	6.12221
MED11	226958_s_at	400569	1.26657	4.02056	6.12389	4.59e-07	8.27e-06	6.11439
TMEM208	221597_s_at	29100	1.27381	3.96189	6.12321	4.6e-07	8.28e-06	6.11233
HOXC6	206858_s_at	3223	1.29085	2.91863	6.11047	4.78e-07	8.57e-06	6.07358
UBE2L6	201649_at	9246	1.37174	6.64339	6.09828	4.97e-07	8.85e-06	6.03656
RP11-554J4.1	230598_at		1.53941	3.17684	6.06181	5.56e-07	9.76e-06	5.92568
OLFML3	218162_at	56944	1.196	2.92478	6.05759	5.63e-07	9.86e-06	5.91286
ATP6V0E2	213587_s_at	155066	1.3639	5.68464	6.05077	5.75e-07	1e-05	5.89213
NUDT18	219665_at	79873	1.27466	5.70618	6.03367	6.06e-07	1.05e-05	5.84012
GBP1	202269_x_at	2633	2.00263	3.65131	6.02999	6.13e-07	1.06e-05	5.82895
LGALS2	208450_at	3957	2.51814	5.56281	6.02326	6.26e-07	1.08e-05	5.80847
SLC31A2	204204_at	1318	2.13683	3.39711	6.01978	6.33e-07	1.09e-05	5.79788
THAP7	218492_s_at	80764	1.00979	6.11254	6.01038	6.51e-07	1.12e-05	5.76931
DANCR	224870_at	57291	2.20595	5.30429	6.00983	6.53e-07	1.12e-05	5.76764
ABRACL	223361_at	58527	1.96869	4.66032	6.00892	6.54e-07	1.12e-05	5.76487
C19orf53	217926_at	28974	1.26623	5.40454	6.00649	6.59e-07	1.13e-05	5.75748
CCR5	206991_s_at	1234	1.00095	3.16127	6.00007	6.73e-07	1.14e-05	5.73796
IP6K2	218192_at	51447	1.02477	5.24792	5.99793	6.77e-07	1.15e-05	5.73145
SCAMP1-AS1	238039_at	728769	1.09302	5.36917	5.99732	6.78e-07	1.15e-05	5.72959
BID	204493_at	637	2.04689	5.49266	5.99108	6.91e-07	1.17e-05	5.71063
PSAP	200866_s_at	5660	1.15532	5.34438	5.97984	7.16e-07	1.21e-05	5.67645
SLC39A4	219215_s_at	55630	1.44089	5.45893	5.97102	7.36e-07	1.23e-05	5.64963
PUS7	218984_at	54517	1.76263	4.51441	5.96964	7.39e-07	1.23e-05	5.64542
TRBC1	210915_x_at	28639	1.89825	5.0408	5.95274	7.78e-07	1.29e-05	5.59403
MT1HL1	211456_x_at	645745	2.16073	6.11125	5.9499	7.85e-07	1.3e-05	5.5854
STUB1	217934_x_at	10273	1.04791	6.56717	5.94636	7.94e-07	1.31e-05	5.57464
SMKR1	235736_at	100287482	1.52045	2.59581	5.94395	8e-07	1.32e-05	5.5673
TIMP2	203167_at	7077	1.33947	3.38288	5.93652	8.18e-07	1.34e-05	5.54471
MRPL32	225260_s_at	64983	1.11621	5.24084	5.93585	8.2e-07	1.34e-05	5.54268
SMIM19	225534_at	114926	1.37514	7.041	5.92187	8.56e-07	1.39e-05	5.50015
CHCHD1	226896_at	118487	1.85105	6.89324	5.92053	8.6e-07	1.4e-05	5.49608
SWI5	226027_at	375757	1.18903	3.78458	5.90038	9.15e-07	1.48e-05	5.43481
EDF1	209058_at	8721	1.14108	7.89363	5.89593	9.28e-07	1.49e-05	5.42129
RCN1	201063_at	5954	1.10627	3.90062	5.85224	1.06e-06	1.67e-05	5.28843
C3AR1	209906_at	719	1.72387	3.15768	5.84932	1.07e-06	1.69e-05	5.27956
PPM1M	226074_at	132160	1.18551	5.00367	5.84944	1.07e-06	1.69e-05	5.27992
PSMB9	204279_at	5698	1.24206	8.76347	5.8483	1.07e-06	1.69e-05	5.27645
PSMB8	209040_s_at	5696	1.35546	7.1548	5.84592	1.08e-06	1.7e-05	5.26922
CD5L	206680_at	922	1.04811	2.98521	5.83461	1.12e-06	1.75e-05	5.23482
MRPS2	218001_at	51116	1.50459	4.83494	5.83539	1.12e-06	1.75e-05	5.23718
TM2D3	1552426_a_at	80213	1.66394	3.99265	5.81689	1.18e-06	1.84e-05	5.18095
KPTN	220160_s_at	11133	1.07251	5.94462	5.81588	1.19e-06	1.85e-05	5.17786
CAPG	201850_at	822	1.61352	4.5474	5.81073	1.21e-06	1.87e-05	5.1622
POLDIP2	217806_s_at	26073	1.04081	6.21393	5.80647	1.22e-06	1.89e-05	5.14926
NXT1	218708_at	29107	1.00664	6.33941	5.80124	1.24e-06	1.92e-05	5.13337
LOC100506302	243224_at	100506302	1.06409	4.43222	5.78938	1.29e-06	1.97e-05	5.0973
OCIAD2	225314_at	132299	1.45856	6.47187	5.77744	1.34e-06	2.03e-05	5.061
TSEN34	218132_s_at	79042	1.07829	6.21702	5.76298	1.4e-06	2.12e-05	5.01703
CEBPB	212501_at	1051	2.18531	5.91758	5.75552	1.43e-06	2.16e-05	4.99438
TCEAL4	202371_at	79921	1.15144	5.96219	5.75702	1.43e-06	2.15e-05	4.99893
WDR43	214662_at	23160	1.03702	4.22877	5.74367	1.49e-06	2.23e-05	4.95834
CYP27B1	205676_at	1594	2.05555	3.14747	5.73965	1.5e-06	2.25e-05	4.94613
LAT	209881_s_at	27040	1.44324	6.01808	5.73028	1.55e-06	2.32e-05	4.91765
COX2	1553569_at	4513	1.49413	6.75995	5.72784	1.56e-06	2.33e-05	4.91022
MKKS	218138_at	8195	1.16755	4.23185	5.72296	1.58e-06	2.36e-05	4.89539
TMEM97	212279_at	27346	1.16429	3.85427	5.72211	1.59e-06	2.36e-05	4.89283
ISG15	205483_s_at	9636	1.39355	6.72314	5.71028	1.65e-06	2.43e-05	4.85685
ATP5J	202325_s_at	522	2.02725	7.28573	5.70841	1.66e-06	2.44e-05	4.85119
SNUPN	207438_s_at	10073	1.03268	5.50396	5.70812	1.66e-06	2.44e-05	4.8503
HSD17B10	202282_at	3028	1.2759	8.03772	5.70355	1.68e-06	2.47e-05	4.83641
TAP1	202307_s_at	6890	1.34549	6.68569	5.70287	1.69e-06	2.47e-05	4.83436
HSD11B1	205404_at	3290	1.75705	3.4969	5.68058	1.81e-06	2.63e-05	4.76662
C1QBP	208910_s_at	708	1.59881	6.08751	5.65015	1.98e-06	2.86e-05	4.67418
ID3	207826_s_at	3399	1.34416	5.043	5.64567	2.01e-06	2.89e-05	4.66056
WSB2	201760_s_at	55884	1.38793	3.83048	5.63842	2.06e-06	2.95e-05	4.63855
DCXR	217973_at	51181	1.07639	4.508	5.60469	2.28e-06	3.24e-05	4.53611
LOC101927151	1569478_s_at	101927151	1.2314	4.55384	5.60366	2.29e-06	3.25e-05	4.53299
TRAF2	204413_at	7186	1.10673	5.77247	5.60201	2.3e-06	3.26e-05	4.52799
CMTM8	235099_at	152189	1.00517	2.44103	5.59209	2.37e-06	3.35e-05	4.49785
PDCD2L	224467_s_at	84306	1.28234	4.17857	5.58659	2.41e-06	3.4e-05	4.48118
RPS12	213377_x_at	6206	1.12833	9.42447	5.58072	2.46e-06	3.45e-05	4.46334
NPC2	200701_at	10577	2.29934	6.89335	5.5726	2.52e-06	3.53e-05	4.43871
MRPL40	203152_at	64976	1.21249	5.7558	5.57118	2.53e-06	3.54e-05	4.43439
HMBS	203040_s_at	3145	1.23819	5.63804	5.57027	2.54e-06	3.55e-05	4.43163
LOC284837	1563088_a_at	284837	1.25377	4.13908	5.5704	2.54e-06	3.55e-05	4.43204
GBP2	202748_at	2634	1.71037	4.43789	5.55712	2.64e-06	3.67e-05	4.39172
MRGBP	218586_at	55257	1.0012	5.13351	5.55701	2.65e-06	3.67e-05	4.39138
LOC100289092	230696_at	100289092	1.24516	4.26067	5.55373	2.67e-06	3.7e-05	4.38144
GIMAP4	219243_at	55303	1.47658	2.4763	5.5404	2.79e-06	3.84e-05	4.34099
CBR3	205379_at	874	1.26499	4.3542	5.53483	2.83e-06	3.9e-05	4.32408
POLR2G	202306_at	5436	1.11783	8.6893	5.52456	2.92e-06	4.01e-05	4.29295
POLR2J	212782_x_at	5439	1.43135	5.48794	5.51524	3.01e-06	4.11e-05	4.26468
PSMA4	203396_at	5685	1.41184	5.93884	5.51473	3.01e-06	4.12e-05	4.26313
NDUFAB1	202077_at	4706	1.44032	5.11408	5.51233	3.04e-06	4.14e-05	4.25582
FBXL15	218938_at	79176	1.03697	5.34032	5.50852	3.07e-06	4.19e-05	4.24429
TIMM9	218316_at	26520	1.24878	4.08046	5.50879	3.07e-06	4.19e-05	4.2451
RPS27L	218007_s_at	51065	1.32092	4.3203	5.49756	3.18e-06	4.32e-05	4.21106
C14orf119	223060_at	55017	1.05568	5.67055	5.49415	3.21e-06	4.35e-05	4.2007
NAA38	224512_s_at	84316	1.70143	6.98423	5.4896	3.26e-06	4.4e-05	4.18692
C1R	212067_s_at	715	1.1224	4.19633	5.47707	3.39e-06	4.54e-05	4.14892
GSTP1	200824_at	2950	1.10006	5.94589	5.4715	3.45e-06	4.61e-05	4.13204
NDUFB5	203621_at	4711	1.17698	6.86539	5.4707	3.45e-06	4.62e-05	4.12962
TUFM	201113_at	7284	1.19446	6.14961	5.46692	3.49e-06	4.67e-05	4.11816
BSPRY	218792_s_at	54836	1.45393	3.48562	5.46002	3.57e-06	4.77e-05	4.09723
GMDS	204875_s_at	2762	1.28182	3.62531	5.44225	3.77e-06	4.98e-05	4.0434
PIGR	204213_at	5284	1.18517	4.05635	5.43503	3.86e-06	5.07e-05	4.02151
RTN1	203485_at	6252	1.18315	2.48403	5.43206	3.89e-06	5.1e-05	4.01254
AMICA1	228094_at	120425	1.23443	4.67689	5.43045	3.91e-06	5.12e-05	4.00766
MYL6B	204173_at	140465	1.52468	5.77217	5.42618	3.96e-06	5.17e-05	3.99471
GPR84	223767_at	53831	1.78365	2.45785	5.42353	4e-06	5.21e-05	3.98668
NDUFV2	202941_at	4729	1.04015	6.17691	5.42027	4.04e-06	5.24e-05	3.9768
RP11-199F11.2	224185_at		1.69046	5.54689	5.41404	4.11e-06	5.33e-05	3.95794
RP11-1094M14.11	235207_at		1.18668	4.01344	5.41305	4.13e-06	5.35e-05	3.95496
MAFF	205193_at	23764	1.28893	4.04126	5.40709	4.2e-06	5.43e-05	3.93691
TMEM14A	218477_at	28978	2.13759	5.20745	5.40654	4.21e-06	5.44e-05	3.93524
PSMG1	203405_at	8624	1.34341	3.24438	5.40355	4.25e-06	5.48e-05	3.92619
S100A8	202917_s_at	6279	2.26987	2.55477	5.3845	4.51e-06	5.74e-05	3.86852
MYL12B	221474_at	103910	1.07563	7.37862	5.38212	4.54e-06	5.77e-05	3.86132
C15orf48	223484_at	84419	2.09605	2.53661	5.37574	4.63e-06	5.87e-05	3.842
MEIS2	207480_s_at	4212	1.10524	2.19178	5.37551	4.63e-06	5.87e-05	3.84131
PAFAH1B3	203228_at	5050	1.21654	6.129	5.37588	4.63e-06	5.87e-05	3.84242
MAL	204777_s_at	4118	1.28314	3.69313	5.36784	4.75e-06	6e-05	3.8181
C11orf73	219979_s_at	51501	1.17238	4.99902	5.36026	4.86e-06	6.12e-05	3.79516
ATP1B1	201242_s_at	481	1.63671	2.85098	5.34825	5.04e-06	6.31e-05	3.75883
NXN	219489_s_at	64359	1.22237	3.39003	5.33323	5.28e-06	6.58e-05	3.71339
KEAP1	202417_at	9817	1.39005	5.33727	5.32923	5.35e-06	6.65e-05	3.7013
AKR1A1	201900_s_at	10327	1.30506	8.26458	5.328	5.37e-06	6.67e-05	3.69758
MT1E	212859_x_at	4493	1.3523	4.99443	5.31474	5.59e-06	6.91e-05	3.65749
MTX2	203517_at	10651	1.2461	4.28626	5.31251	5.63e-06	6.95e-05	3.65076
PRF1	1553681_a_at	5551	1.28043	4.61954	5.3011	5.83e-06	7.17e-05	3.61627
AVEN	219366_at	57099	1.20847	4.96836	5.29878	5.87e-06	7.21e-05	3.60927
CHCHD10	224932_at	400916	1.38172	6.19015	5.28804	6.07e-06	7.42e-05	3.57682
PAXIP1-AS1	235587_at	202781	1.41936	6.86556	5.28275	6.17e-06	7.53e-05	3.56084
LRRC32	203835_at	2615	1.63673	4.6706	5.26444	6.53e-06	7.9e-05	3.50553
CCDC23	226723_at	374969	1.01051	4.37317	5.26016	6.62e-06	7.98e-05	3.4926
LGALS3BP	200923_at	3959	1.29391	3.19326	5.24749	6.88e-06	8.27e-05	3.45437
TPI1	200822_x_at	7167	1.2989	6.78715	5.24509	6.93e-06	8.33e-05	3.44712
PPT1	200975_at	5538	1.12472	6.34394	5.2385	7.07e-06	8.46e-05	3.42724
TNFSF13	210314_x_at	8741	1.30162	4.80677	5.22329	7.41e-06	8.81e-05	3.38136
C16orf59	219556_at	80178	1.29983	4.81311	5.22119	7.46e-06	8.85e-05	3.37503
CSF1R	203104_at	1436	1.41124	5.28072	5.21231	7.67e-06	9.07e-05	3.34824
DPY30	224129_s_at	84661	1.10479	6.30027	5.20862	7.75e-06	9.15e-05	3.33709
F8	205756_s_at	2157	1.11025	2.34089	5.20441	7.85e-06	9.26e-05	3.32442
IDO1	210029_at	3620	1.89665	3.71182	5.19928	7.98e-06	9.39e-05	3.30895
RPLP2	200908_s_at	6181	1.06388	4.34772	5.18881	8.24e-06	9.63e-05	3.27738
ATP5L	207573_x_at	10632	1.34189	6.58646	5.17967	8.48e-06	9.87e-05	3.24985
NDUFA9	208969_at	4704	1.08254	6.93625	5.16326	8.92e-06	0.000103068	3.20042
RPA3	209507_at	6119	1.67435	4.83169	5.16171	8.96e-06	0.000103452	3.19574
CTA-29F11.1	227044_at		1.02541	5.81481	5.14951	9.3e-06	0.000106899	3.159
HILPDA	1554452_a_at	29923	1.2866	2.98571	5.14498	9.43e-06	0.00010811	3.14536
CXCL14	218002_s_at	9547	1.0199	3.56564	5.14244	9.51e-06	0.000108725	3.13774
TYMP	204858_s_at	1890	1.02347	3.90912	5.13544	9.71e-06	0.000110741	3.11666
GGTA1P	228376_at	2681	1.7509	3.57765	5.12878	9.91e-06	0.000112676	3.09663
PSMB3	201400_at	5691	1.57666	6.11083	5.12319	1.01e-05	0.000114213	3.07979
RITA1	221777_at	84934	1.27244	5.32819	5.1174	1.03e-05	0.00011602	3.06239
GLIPR2	225602_at	152007	1.2496	4.0301	5.09666	1.09e-05	0.00012257	3.00003
SFN	209260_at	2810	1.43987	4.51553	5.0811	1.15e-05	0.000127912	2.95326
ALDOA	200966_x_at	226	1.18652	6.75154	5.07548	1.17e-05	0.000129673	2.93637
ARPC5L	220966_x_at	81873	1.05918	6.46348	5.05624	1.24e-05	0.000136724	2.8786
NAT9	204382_at	26151	1.10289	6.35222	5.05674	1.24e-05	0.000136584	2.8801
LILRB1	207104_x_at	10859	1.07684	3.81273	5.05227	1.25e-05	0.00013812	2.86668
SRM	201516_at	6723	1.55166	5.22721	5.03684	1.31e-05	0.000143579	2.82037
CXCL16	223454_at	58191	1.52531	3.61086	5.01047	1.43e-05	0.00015359	2.74128
CKS1B	201897_s_at	1163	1.31371	4.6851	5.00723	1.44e-05	0.00015474	2.73156
TCEAL3	227279_at	85012	1.3461	5.12124	5.00684	1.44e-05	0.000154847	2.7304
VWCE	242957_at	220001	1.53147	4.6749	5.00786	1.44e-05	0.000154516	2.73346
GNA15	205349_at	2769	1.47844	2.97849	4.99961	1.47e-05	0.000157847	2.70874
CTSA	200661_at	5476	1.26275	5.09562	4.99302	1.5e-05	0.000160593	2.68897
FCGR1B	214511_x_at	2210	2.18739	3.10753	4.99345	1.5e-05	0.000160462	2.69028
EPCAM	201839_s_at	4072	1.72931	2.54225	4.99134	1.51e-05	0.000161186	2.68395
TM2D2	224413_s_at	83877	1.1573	5.14589	4.98896	1.52e-05	0.000162049	2.67682
ND2	1553551_s_at	4536	1.73965	6.31099	4.98449	1.54e-05	0.000163879	2.66345
LSM6	205036_at	11157	1.32351	5.72344	4.97399	1.59e-05	0.000168571	2.632
LGMN	201212_at	5641	1.67498	3.79188	4.97235	1.6e-05	0.000169019	2.62707
RUVBL2	1559945_at	10856	1.03231	5.42226	4.97332	1.6e-05	0.000168681	2.62998
TOX2	228737_at	84969	1.20555	2.27269	4.97385	1.6e-05	0.000168571	2.63158
TUBB6	209191_at	84617	2.15426	3.83136	4.97385	1.6e-05	0.000168571	2.63157
ALAS1	205633_s_at	211	1.5639	4.1096	4.95561	1.69e-05	0.000177094	2.57699
NAA20	223040_at	51126	1.06659	5.93419	4.9557	1.69e-05	0.000177094	2.57724
ARPC1B	201954_at	10095	1.05605	7.02914	4.94945	1.72e-05	0.000180075	2.55855
PDZD11	223037_at	51248	1.59985	6.15203	4.94875	1.72e-05	0.000180375	2.55645
PITPNA-AS1	228972_at	100306951	1.3044	5.46133	4.94998	1.72e-05	0.000179871	2.56013
GNG5	207157_s_at	2787	1.32888	8.02473	4.9421	1.76e-05	0.000183463	2.53657
UPP1	203234_at	7378	1.25504	4.75839	4.9376	1.78e-05	0.000185563	2.52311
PIGP	221689_s_at	51227	1.05444	5.96255	4.93571	1.79e-05	0.00018655	2.51746
CHN1	212624_s_at	1123	1.03147	2.87877	4.93363	1.8e-05	0.000187559	2.51124
TCTEX1D2	228606_at	255758	1.31751	4.92126	4.90581	1.96e-05	0.000202002	2.42811
SNRNP25	218493_at	79622	1.45724	7.80559	4.90267	1.98e-05	0.000203376	2.41873
AHCY	200903_s_at	191	1.14212	5.05156	4.88785	2.08e-05	0.000211999	2.3745
GSTK1	217751_at	373156	1.07496	6.36925	4.88259	2.11e-05	0.000215027	2.35882
SARS2	218702_at	54938	1.00986	4.86916	4.87665	2.15e-05	0.000218152	2.34107
JADE3	204866_at	9767	1.44933	2.7217	4.86807	2.21e-05	0.000223326	2.3155
MMP1	204475_at	4312	1.83669	2.28809	4.85639	2.29e-05	0.000230249	2.28067
IRF2BPL	223474_at	64207	1.47143	6.16587	4.84287	2.38e-05	0.000238184	2.24038
RARRES3	204070_at	5920	1.60223	4.54727	4.83912	2.41e-05	0.000240479	2.22923
MYO1F	213733_at	4542	1.44016	3.36742	4.8353	2.44e-05	0.000242517	2.21785
EMC9	219203_at	51016	1.275	5.58229	4.82045	2.55e-05	0.000252604	2.17364
PMS2P1	214526_x_at	5379	1.18487	6.03431	4.80226	2.7e-05	0.000264962	2.11952
MFSD1	218109_s_at	64747	1.02576	7.37072	4.79657	2.74e-05	0.000269229	2.10261
RPL38	202028_s_at	6169	1.15129	8.36716	4.78915	2.81e-05	0.000274272	2.08056
RTP4	219684_at	64108	1.3573	3.62381	4.78345	2.85e-05	0.000278075	2.06362
TMEM163	1552626_a_at	81615	1.68895	4.17991	4.77941	2.89e-05	0.000281016	2.05161
RHOG	203175_at	391	1.17237	6.47498	4.77478	2.93e-05	0.000284493	2.03788
RPL26L1	218830_at	51121	1.35883	6.34459	4.77345	2.94e-05	0.000285399	2.03391
IMMP1L	229025_s_at	196294	1.04412	2.99721	4.77097	2.97e-05	0.000287434	2.02655
C12orf5	219099_at	57103	1.3521	4.01133	4.7623	3.04e-05	0.000294596	2.00082
HLA-DPB2	239975_at	3116	2.3228	4.46111	4.76273	3.04e-05	0.000294346	2.00208
SNRPB	208821_at	6628	1.51308	5.19424	4.73402	3.32e-05	0.000316843	1.91692
APEX1	210027_s_at	328	1.01573	6.73641	4.72753	3.38e-05	0.000322438	1.89769
MAMDC4	229473_at	158056	1.17327	5.31158	4.72376	3.42e-05	0.000325019	1.88653
SUSD1	226264_at	64420	1.46706	3.79173	4.70182	3.66e-05	0.000344277	1.82155
CCL8	214038_at	6355	1.59906	2.2083	4.69338	3.76e-05	0.000351536	1.79659
CCRL2	211434_s_at	9034	1.54902	3.53472	4.69108	3.78e-05	0.000353704	1.78977
MYH10	212372_at	4628	1.0255	3.05989	4.68736	3.82e-05	0.000357256	1.77878
GBAP1	210589_s_at	2630	1.01559	5.46429	4.67012	4.03e-05	0.00037468	1.72782
ACTG2	202274_at	72	1.1305	3.51426	4.65712	4.19e-05	0.000387667	1.68942
NINJ2	219594_at	4815	1.44626	5.03891	4.64626	4.33e-05	0.000399392	1.65734
SLC25A5	200657_at	292	1.1601	9.37425	4.64445	4.36e-05	0.000401075	1.65201
TRG-AS1	239237_at	100506776	1.39874	3.13159	4.63969	4.42e-05	0.000405694	1.63797
PTS	209694_at	5805	1.52488	5.20276	4.63041	4.55e-05	0.000415163	1.61059
RNASEH2A	203022_at	10535	1.43646	5.18536	4.62851	4.57e-05	0.000417039	1.60498
IL7R	205798_at	3575	1.08048	3.49739	4.62207	4.66e-05	0.000424181	1.58601
IFI6	204415_at	2537	1.59839	4.0284	4.60495	4.91e-05	0.000442847	1.53558
IL15RA	207375_s_at	3601	1.40963	5.39053	4.60131	4.97e-05	0.00044665	1.52484
ST3GAL5	203217_s_at	8869	1.25405	5.75757	4.59869	5e-05	0.000449267	1.51714
NCF2	209949_at	4688	1.79985	4.33288	4.59671	5.03e-05	0.000451412	1.5113
ZBED2	219836_at	79413	2.10203	4.79993	4.59625	5.04e-05	0.000451666	1.50995
RAB43	229894_s_at	339122	1.09703	4.68226	4.59247	5.1e-05	0.000456099	1.49884
MRPL18	217907_at	29074	1.20201	6.04025	4.58215	5.26e-05	0.000468295	1.46847
MRPS7	217932_at	51081	1.20783	4.73707	4.58182	5.27e-05	0.000468527	1.4675
GADD45G	204121_at	10912	1.39719	4.71633	4.56308	5.57e-05	0.000493816	1.41242
FBLN7	229247_at	129804	1.10086	2.95672	4.54029	5.97e-05	0.000523035	1.34549
ITM2A	202746_at	9452	1.46066	3.55146	4.52959	6.17e-05	0.00053738	1.31411
PKN3	226299_at	29941	1.27426	3.29999	4.52262	6.3e-05	0.000546824	1.29368
ADSL	202144_s_at	158	1.07	7.11864	4.50648	6.61e-05	0.000570895	1.2464
LYAR	223413_s_at	55646	1.00445	5.55672	4.47337	7.31e-05	0.000620393	1.14956
TYW3	227141_at	127253	1.40643	6.19371	4.44935	7.85e-05	0.000660946	1.07941
PRDX1	208680_at	5052	1.58738	7.61277	4.44038	8.07e-05	0.000676633	1.05326
GIMAP7	228071_at	168537	1.59438	2.37302	4.43811	8.12e-05	0.000680208	1.04665
CCL22	207861_at	6367	1.11216	4.53846	4.43182	8.28e-05	0.000689194	1.02831
CD44	1557905_s_at	960	1.06005	3.91503	4.42451	8.46e-05	0.000702603	1.00701
HDGF	200896_x_at	3068	1.08867	7.6834	4.42303	8.5e-05	0.000704657	1.0027
VSIG4	204787_at	11326	1.61817	3.55442	4.41981	8.58e-05	0.000710971	0.993302
ND4	224372_at	4538	1.37717	7.26447	4.41872	8.61e-05	0.000712755	0.99013
LOC101930114	237154_at	101930114	1.48621	3.16215	4.40269	9.04e-05	0.000742209	0.943483
PSMA1	201676_x_at	5682	1.09829	6.22271	4.38825	9.44e-05	0.000770957	0.90151
CCR10	220565_at	2826	1.30872	3.6933	4.38364	9.57e-05	0.000779343	0.888103
CALHM2	221565_s_at	51063	1.07876	4.60996	4.36621	0.000100796	0.000813851	0.8375
CDKN1A	202284_s_at	1026	1.09271	6.59884	4.36555	0.000100995	0.000814775	0.835586
BCKDK	202030_at	10295	1.08285	5.21373	4.36363	0.000101577	0.000817941	0.830025
ASMT	206779_s_at	438	1.47528	2.9461	4.35203	0.000105166	0.000841836	0.796382
GPI	208308_s_at	2821	1.14212	5.69764	4.34436	0.000107607	0.000858835	0.774157
TBC1D27	233483_at	96597	1.03003	4.83165	4.34249	0.000108212	0.000862712	0.768725
TLR8	220832_at	51311	1.15739	2.42742	4.34016	0.000108969	0.000866194	0.761975
CHURC1	223210_at	91612	1.02243	4.65424	4.33092	0.00011202	0.000885568	0.735235
IMPA2	203126_at	3613	1.1904	5.15311	4.31333	0.000118065	0.000926589	0.68435
IL17RB	219255_x_at	55540	1.47834	3.85489	4.30324	0.000121677	0.000951321	0.655182
RAN	200749_at	5901	1.13639	4.99817	4.29967	0.000122978	0.000958893	0.644886
SMS	202043_s_at	6611	1.41086	4.06585	4.29843	0.000123435	0.000961765	0.641295
MRPS36	224302_s_at	92259	1.42879	5.0289	4.29767	0.000123716	0.000963607	0.639095
FAM101B	226876_at	359845	1.32854	4.3766	4.27286	0.000133214	0.0010222	0.56753
CCT6A	201326_at	908	1.00033	5.79915	4.25334	0.000141186	0.00107229	0.511313
EIF2B2	202461_at	8892	1.20076	5.7727	4.25218	0.000141672	0.00107485	0.507989
DHRS3	202481_at	9249	1.09829	3.15036	4.24333	0.000145452	0.00109852	0.48253
ACP2	202767_at	53	1.06322	4.23599	4.23771	0.000147905	0.00111433	0.466358
LOC101928545	230450_at	101928545	1.01878	2.85954	4.22383	0.000154131	0.00115162	0.426504
DUSP2	204794_at	1844	1.76552	6.1669	4.22303	0.000154498	0.00115357	0.424207
PHB2	201600_at	11331	1.0117	7.94908	4.216	0.000157757	0.00117547	0.40403
SS18L2	218283_at	51188	1.01422	6.77069	4.21102	0.000160107	0.00119093	0.389745
DAD1	200046_at	1603	1.30831	6.84199	4.20671	0.000162169	0.00120214	0.377379
IL18RAP	207072_at	8807	1.68755	4.04883	4.20624	0.000162398	0.00120307	0.376015
SLC25A6	212085_at	293	1.19921	7.42923	4.20622	0.000162406	0.00120307	0.375968
SNRPA	201770_at	6626	1.05625	4.87842	4.19866	0.000166092	0.00122576	0.354286
RAB33A	206039_at	9363	1.62135	5.73474	4.18514	0.000172882	0.00126681	0.315581
NSMCE1	224666_at	197370	1.02864	7.61627	4.18466	0.000173127	0.00126817	0.314216
LILRB2	207697_x_at	10288	1.09219	3.16212	4.18064	0.000175201	0.00128077	0.302712
LOC101928173	236787_at	101928173	1.10199	2.48011	4.17675	0.000177237	0.00129303	0.291557
IMPDH2	201892_s_at	3615	1.00291	8.32363	4.17651	0.000177359	0.00129334	0.290892
TPRKB	219030_at	51002	1.09974	4.08489	4.17631	0.000177464	0.00129338	0.290318
SAC3D1	205449_at	29901	1.61872	6.63349	4.17482	0.000178251	0.0012978	0.286046
SLC12A7	218066_at	10723	1.22088	6.4119	4.16581	0.000183072	0.00132799	0.26028
UQCRFS1	208909_at	7386	1.1205	7.27939	4.15356	0.000189825	0.00136873	0.22531
MRPL3	208787_at	11222	1.19157	6.30245	4.15142	0.000191035	0.00137562	0.219178
RPL39L	210115_at	116832	1.16088	3.73483	4.15087	0.000191346	0.0013774	0.217611
SLC20A1	201920_at	6574	1.01025	4.91895	4.12417	0.000207049	0.00147635	0.141502
DFNA5	203695_s_at	1687	1.09548	4.49331	4.12096	0.000209023	0.00148783	0.132348
NOD2	220066_at	64127	1.27117	3.36159	4.11303	0.000213973	0.00151708	0.109776
APOD	201525_at	347	1.04467	2.42775	4.10581	0.000218577	0.00154416	0.0892445
CTSH	202295_s_at	1512	1.2063	9.96872	4.1036	0.000220002	0.00155271	0.0829751
CXorf40A	213315_x_at	91966	1.10015	6.55222	4.10107	0.000221648	0.00156025	0.0757912
TP53I3	210609_s_at	9540	1.1871	4.51358	4.08877	0.00022983	0.00160896	0.0408405
CCL19	210072_at	6363	1.4081	2.86041	4.06574	0.000245946	0.00170193	-0.024476
IQCG	1553757_at	84223	1.00714	2.95534	4.06535	0.000246225	0.00170193	-0.0255682
ATHL1	219359_at	80162	1.18265	5.83901	4.03709	0.000267545	0.00181945	-0.105557
WARS	200628_s_at	7453	1.51308	5.7044	4.02391	0.000278087	0.00187817	-0.14277
RAB25	218186_at	57111	1.27642	3.06408	4.02066	0.000280744	0.00189317	-0.151923
SLC7A7	204588_s_at	9056	1.25341	6.2588	4.01195	0.000288002	0.00193248	-0.17649
CPVL	208146_s_at	54504	1.29742	3.13978	4.00697	0.000292234	0.00195906	-0.190531
IL2RB	205291_at	3560	1.50083	6.14698	4.00478	0.000294113	0.00196799	-0.196698
WBP5	217975_at	51186	1.01611	2.87193	3.99772	0.000300254	0.0019992	-0.216583
CD33	206120_at	945	1.0723	3.11003	3.99272	0.000304684	0.00202124	-0.230675
GIMAP2	232024_at	26157	1.20606	4.82615	3.98968	0.000307407	0.00203681	-0.239233
GPR64	206002_at	10149	1.04375	2.12212	3.98245	0.000313974	0.00207397	-0.259564
HIST1H2BD	209911_x_at	3017	1.37366	3.80456	3.97778	0.000318289	0.00209799	-0.272692
H2BFS	208579_x_at	54145	1.11183	3.1277	3.97387	0.000321938	0.00211561	-0.283655
TALDO1	201463_s_at	6888	1.09119	6.87088	3.95846	0.00033675	0.00219826	-0.326905
TNFRSF1B	203508_at	7133	1.1195	4.72714	3.95713	0.000338067	0.00220354	-0.330658
CKS2	204170_s_at	1164	2.46558	6.8653	3.95489	0.000340278	0.00221595	-0.336925
EMR1	207111_at	2015	1.33891	3.16656	3.95383	0.000341334	0.00222149	-0.339902
MRPL51	223086_x_at	51258	1.06094	5.95565	3.94063	0.000354724	0.00228801	-0.376884
CENPM	218741_at	79019	1.50357	6.32507	3.92444	0.000371848	0.00237932	-0.422179
CUTA	221488_s_at	51596	1.01013	9.76099	3.92309	0.000373307	0.00238584	-0.425941
GRHPR	201347_x_at	9380	1.60075	6.13468	3.91961	0.000377109	0.002408	-0.435674
HIST1H2BK	209806_at	85236	1.78394	7.61867	3.91021	0.000387561	0.0024682	-0.461932
APOL3	221087_s_at	80833	1.163	5.48425	3.89985	0.000399405	0.00252727	-0.490834
HTRA4	1553706_at	203100	1.48122	5.43418	3.89174	0.000408915	0.0025784	-0.513424
CTB-12A17.3	1563431_x_at		1.09712	4.1223	3.88291	0.000419528	0.00263611	-0.538015
GALNT11	219013_at	63917	1.37747	5.38042	3.88274	0.000419738	0.00263626	-0.538495
CHIT1	208168_s_at	1118	1.1288	3.24259	3.85434	0.000455729	0.00282756	-0.617419
PAN3-AS1	243092_at	100288730	1.16004	3.58641	3.83582	0.000480795	0.00296347	-0.668755
RSPH1	230093_at	89765	1.4858	3.53197	3.8283	0.000491349	0.00301992	-0.689568
INPP5F	203607_at	22876	1.21794	4.5485	3.81779	0.000506482	0.00310061	-0.718637
CTPS1	202613_at	1503	1.26527	4.54369	3.81618	0.000508834	0.00311413	-0.723077
HN1	217755_at	51155	1.18626	4.9012	3.81507	0.000510476	0.00312241	-0.726163
YIF1A	202418_at	10897	1.20207	5.70314	3.78194	0.000561581	0.003374	-0.817539
GGH	203560_at	8836	1.20845	3.43428	3.77404	0.000574473	0.00343715	-0.839264
CDT1	209832_s_at	81620	1.5291	3.96889	3.74111	0.000631415	0.0037153	-0.929683
GBP5	229625_at	115362	1.54278	4.19812	3.73955	0.00063423	0.00373078	-0.933937
RP11-532F12.5	242354_at		1.07204	3.02585	3.72455	0.000662062	0.00385263	-0.974997
CDCA5	224753_at	113130	1.2571	5.08967	3.72045	0.000669869	0.00389074	-0.986202
NMI	203964_at	9111	1.08169	4.98612	3.70149	0.000707164	0.00406052	-1.03797
MSMO1	209146_at	6307	1.17392	4.06899	3.701	0.000708151	0.00406511	-1.0393
SPARCL1	200795_at	8404	1.16417	2.81984	3.69548	0.000719398	0.00412093	-1.05436
GNLY	205495_s_at	10578	1.18387	3.70355	3.69006	0.000730605	0.0041774	-1.06912
TST	209605_at	7263	1.57357	5.73637	3.67485	0.000762968	0.00433042	-1.1105
GNGT2	235139_at	2793	1.0437	5.20681	3.67404	0.000764735	0.0043359	-1.11271
MTHFD2	201761_at	10797	1.20576	4.59595	3.65812	0.000800184	0.00450458	-1.15596
HEXB	201944_at	3074	1.16245	4.35726	3.65549	0.000806178	0.00453525	-1.16308
PXMP2	219076_s_at	5827	1.44357	5.99453	3.62849	0.000870408	0.00483875	-1.23619
PPA1	217848_s_at	5464	1.40326	7.45432	3.62291	0.000884274	0.00490702	-1.25125
LDHB	201030_x_at	3945	1.05126	9.09105	3.6103	0.000916421	0.00505819	-1.28528
DUSP6	208891_at	1848	1.04223	3.73557	3.59748	0.000950244	0.00520902	-1.31981
FAM26F	228362_s_at	441168	1.13144	5.07069	3.5845	0.000985738	0.00537726	-1.35473
PBX4	230536_at	80714	1.05612	4.19561	3.57561	0.00101078	0.00548122	-1.37862
HNRNPAB	201277_s_at	3182	1.03375	6.89514	3.56958	0.00102809	0.00556531	-1.39478
FEZ1	203562_at	9638	1.02925	3.71651	3.55845	0.00106084	0.00570305	-1.42462
PIM2	204269_at	11040	1.03436	5.72266	3.53605	0.0011298	0.00601068	-1.48451
TFAP2A-AS1	1557070_at	100130275	1.06491	2.98553	3.53526	0.0011323	0.00602105	-1.48662
THOC7	218334_at	80145	1.15421	5.85438	3.5264	0.00116082	0.00615103	-1.51026
CD97	202910_s_at	976	1.01955	6.00754	3.52605	0.00116196	0.00615368	-1.5112
ETFA	201931_at	2108	1.00787	4.73274	3.51519	0.0011979	0.00631407	-1.54015
LOC101928487	231312_at	101928487	1.11013	3.74938	3.43782	0.00148652	0.00752222	-1.74499
TNFRSF13B	207641_at	23495	1.1349	6.53239	3.41086	0.00160199	0.00799997	-1.81586
SLC2A6	220091_at	11182	1.0046	6.58695	3.40723	0.00161816	0.00806585	-1.82537
CRIP1	205081_at	1396	1.62978	6.65347	3.36425	0.00182212	0.00890616	-1.93768
FGL2	204834_at	10875	1.1312	3.15556	3.33109	0.00199602	0.00958313	-2.02381
KIF2C	209408_at	11004	1.03983	4.53072	3.32899	0.00200757	0.0096343	-2.02926
DCTN3	204246_s_at	11258	1.03232	6.56482	3.32565	0.002026	0.0097034	-2.03789
GAPDH	212581_x_at	2597	1.38557	8.34549	3.31652	0.00207737	0.00990995	-2.06152
ADA	204639_at	100	1.9253	6.83958	3.30966	0.00211671	0.010071	-2.07923
UQCRC1	201903_at	7384	1.00574	6.33531	3.29272	0.00221705	0.0104793	-2.12292
ZWINT	204026_s_at	11130	2.69707	6.78995	3.28002	0.00229521	0.0107642	-2.15558
TUBB	209026_x_at	203068	1.11059	5.52567	3.27734	0.00231205	0.0108221	-2.16247
UCHL3	204616_at	7347	1.01479	4.19831	3.27462	0.00232929	0.0108839	-2.16947
SQRDL	217995_at	58472	1.28702	6.22971	3.23904	0.00256583	0.0118189	-2.26054
ADM	202912_at	133	1.38334	4.28263	3.22804	0.00264344	0.0121139	-2.28858
DYNLL1	200703_at	8655	1.03997	6.59251	3.19146	0.00291801	0.0131796	-2.38146
KISS1R	242517_at	84634	1.24979	4.00477	3.12725	0.00346669	0.015226	-2.54308
PRDX4	201923_at	10549	1.94937	7.35261	3.12427	0.00349445	0.0153324	-2.55055
RNF149	225414_at	284996	1.05384	4.85709	3.11538	0.00357833	0.0156244	-2.57277
GINS1	206102_at	9837	1.52858	5.26167	3.08313	0.00389899	0.0167311	-2.65306
TUBB4B	208977_x_at	10383	1.29562	7.37047	3.06624	0.00407756	0.0173105	-2.69492
SPC25	209891_at	57405	1.08133	3.1951	3.03475	0.00443132	0.0185306	-2.77259
EGR2	205249_at	1959	1.17486	5.05685	3.01955	0.00461227	0.0191651	-2.80991
LDHA	200650_s_at	3939	1.23117	9.08837	3.01753	0.0046369	0.0192501	-2.81488
SSR4	201004_at	6748	1.75524	7.52577	3.00051	0.00484879	0.0199906	-2.85652
NAPSB	228055_at	256236	1.42948	8.60614	2.98093	0.00510385	0.0208727	-2.90424
OIP5	213599_at	11339	1.19828	3.37461	2.96804	0.00527869	0.0214285	-2.93558
TIPIN	219258_at	54962	1.23522	3.75151	2.9296	0.00583392	0.0231911	-3.0285
CTHRC1	225681_at	115908	1.67597	3.03011	2.91824	0.00600814	0.0237528	-3.0558
IL21R	219971_at	50615	1.03016	6.00255	2.83606	0.00742229	0.028265	-3.25147
C12orf75	225105_at	387882	1.37705	5.6476	2.78235	0.00850837	0.031579	-3.37742
SLAMF7	219159_s_at	57823	1.04869	3.47704	2.75224	0.00918045	0.0336352	-3.44737
IMP4	212411_at	92856	1.07775	6.92532	2.7296	0.00971771	0.035181	-3.49962
AURKA	204092_s_at	6790	1.0056	4.45167	2.70611	0.0103059	0.0368239	-3.55353
RP1-93H18.6	229543_at		1.32319	5.72365	2.68391	0.010892	0.0385549	-3.6042
KIF18B	222039_at	146909	1.35515	5.55902	2.68052	0.0109843	0.0388061	-3.61192
NLRC5	226474_at	84166	1.15081	8.91577	2.66439	0.0114328	0.0400445	-3.64854
MDH1	200978_at	4190	1.06025	7.21811	2.66286	0.0114764	0.0401515	-3.65201
TMEM184B	202027_at	25829	1.18569	6.19097	2.6469	0.0119384	0.0413729	-3.68808
LOC100996740	229872_s_at	100996740	1.03736	9.44059	2.64085	0.0121179	0.0418118	-3.70171
SGK1	201739_at	6446	1.75544	6.71395	2.6227	0.0126717	0.0433754	-3.74248
RRM2	201890_at	6241	2.29932	7.29133	2.55919	0.0147985	0.0490633	-3.88366
PTTG1	203554_x_at	9232	1.42265	6.16671	2.55376	0.0149946	0.0495441	-3.89561

## Sheet: Down regulated genes
246 down-regulated differentialloy expressed genes (DEGs) (p < 0.05 and |log2FC|>1).
gene symbol	logFC	AveExpr	t	P.Value	adj.P.Val	B
ABLIM1	-1.39332	4.92022	-11.6731	7.52e-14	3.62e-11	21.5096
DSERG1	-2.11797	4.93103	-11.6486	7.99e-14	3.68e-11	21.4504
AK025288	-2.49951	5.97618	-11.6322	8.32e-14	3.75e-11	21.4106
AY940074	-1.78407	5.86165	-11.2793	2.01e-13	7.61e-11	20.5466
ANKHD1	-1.61378	4.38125	-11.2364	2.24e-13	8e-11	20.4404
SLC6A16	-1.59996	5.01352	-11.0519	3.58e-13	1.19e-10	19.9811
LOC102724356	-2.61164	5.44852	-10.9294	4.9e-13	1.56e-10	19.6734
LOC100134822	-2.5239	6.22446	-10.7512	7.76e-13	2.07e-10	19.2222
ZNF652	-1.13302	3.62299	-10.7001	8.86e-13	2.21e-10	19.092
LOC100289058	-1.8379	5.82091	-10.6661	9.68e-13	2.28e-10	19.0053
UBXN2A	-1.39685	7.28572	-10.5004	1.49e-12	3.13e-10	18.5799
BC041025	-1.33873	3.87832	-10.1362	3.91e-12	6.83e-10	17.632
BC032415	-1.23844	3.80347	-10.0491	4.94e-12	8.23e-10	17.4026
ZNF721	-1.17524	7.34684	-9.91375	7.11e-12	1.08e-09	17.044
ZBTB20	-1.12106	3.75313	-9.86905	8.03e-12	1.18e-09	16.925
LOC100289333	-1.30762	8.85185	-9.84431	8.58e-12	1.25e-09	16.859
ZNF665	-1.64282	5.24866	-9.76825	1.06e-11	1.48e-09	16.6557
ZNF302	-1.32607	4.95059	-9.61756	1.59e-11	2.04e-09	16.2506
STRBP	-1.94824	5.42797	-9.59473	1.69e-11	2.11e-09	16.189
SLC26A6	-1.28806	4.97992	-9.57905	1.77e-11	2.18e-09	16.1466
ZNF638	-1.28486	4.79085	-9.57025	1.81e-11	2.22e-09	16.1228
DCLRE1C	-1.06022	4.63732	-9.48702	2.28e-11	2.61e-09	15.8972
ZNF75A	-1.02833	5.78938	-9.41283	2.8e-11	3e-09	15.6953
RP11-403P17.4	-1.22812	11.4043	-9.393	2.95e-11	3.14e-09	15.6412
ARHGEF1	-1.24701	6.87326	-9.35072	3.32e-11	3.47e-09	15.5257
KDM4C	-1.00523	4.34131	-9.34289	3.39e-11	3.53e-09	15.5043
SPEN	-1.28187	5.16306	-9.11525	6.4e-11	5.93e-09	14.8781
EBF1	-2.01598	4.78382	-9.06137	7.45e-11	6.58e-09	14.729
LOC286272	-1.99952	3.50103	-9.03475	8.03e-11	7.04e-09	14.6551
LOC100996255	-1.15278	6.89244	-8.95151	1.02e-10	8.55e-09	14.4236
ZNF502	-1.10559	4.43227	-8.76009	1.75e-10	1.32e-08	13.8877
NEK5	-1.13882	2.9262	-8.73792	1.86e-10	1.38e-08	13.8254
LRRC69	-1.6259	4.84579	-8.70271	2.06e-10	1.51e-08	13.7262
RUNX1-IT1	-1.52731	5.27268	-8.66473	2.29e-10	1.63e-08	13.6191
AC068039.4	-1.65394	5.01277	-8.57987	2.92e-10	2e-08	13.379
GNG7	-1.48866	5.20947	-8.57607	2.96e-10	2.02e-08	13.3683
CTC-429P9.3	-1.19082	5.05258	-8.55788	3.12e-10	2.12e-08	13.3167
KIAA0754	-1.01138	2.94099	-8.53716	3.31e-10	2.22e-08	13.2579
C9orf38	-2.14198	4.46365	-8.49937	3.69e-10	2.43e-08	13.1505
CTB-181H17.1	-1.79571	4.14828	-8.46498	4.07e-10	2.61e-08	13.0526
SLC15A2	-1.45992	4.26531	-8.44982	4.25e-10	2.68e-08	13.0094
ZNF791	-1.52933	6.04667	-8.38996	5.06e-10	3.12e-08	12.8386
LOC100131347	-1.36776	3.89303	-8.3777	5.24e-10	3.22e-08	12.8036
ASAP1-IT2	-1.43322	3.89115	-8.35464	5.6e-10	3.38e-08	12.7376
BC044596	-1.36434	6.12768	-8.35058	5.67e-10	3.4e-08	12.726
RALGPS2	-1.18368	4.15975	-8.30327	6.5e-10	3.79e-08	12.5905
FKSG49	-1.15449	6.41326	-8.26384	7.29e-10	4.1e-08	12.4773
P2RY8	-2.38145	6.69697	-8.22959	8.05e-10	4.47e-08	12.3789
FAM106A	-1.0353	2.62575	-8.22821	8.08e-10	4.48e-08	12.3749
AP000347.2	-1.21001	5.02839	-8.21781	8.33e-10	4.56e-08	12.345
LINC01426	-1.56938	3.36676	-8.20922	8.54e-10	4.66e-08	12.3202
REV3L	-1.38537	4.00059	-8.20221	8.72e-10	4.72e-08	12.3001
GABRB1	-2.04612	4.34933	-8.18672	9.12e-10	4.89e-08	12.2554
SNX29	-1.83898	6.02492	-8.17483	9.45e-10	5e-08	12.2212
NPTN-IT1	-1.39076	6.00515	-8.16826	9.63e-10	5.07e-08	12.2022
RBM6	-1.26734	5.75585	-8.15566	9.99e-10	5.21e-08	12.1659
PLEKHM3	-1.14883	3.9185	-8.08982	1.21e-09	6.1e-08	11.9757
PNOC	-1.8593	6.92714	-8.06069	1.32e-09	6.57e-08	11.8914
MGC24103	-1.98112	5.26307	-8.03117	1.44e-09	7.08e-08	11.8058
KIAA0125	-1.94031	6.36189	-7.97527	1.69e-09	8.05e-08	11.6436
TNFAIP8L3	-2.21708	4.79727	-7.9471	1.84e-09	8.57e-08	11.5617
PTCSC1	-1.80228	6.16842	-7.92895	1.94e-09	8.99e-08	11.5089
LOC654780	-1.21754	6.37724	-7.92042	1.99e-09	9.12e-08	11.4841
DSC1	-1.32087	3.26731	-7.91884	2e-09	9.14e-08	11.4795
EDNRB-AS1	-2.07911	4.67067	-7.84183	2.51e-09	1.1e-07	11.2549
GPATCH8	-1.14368	5.51453	-7.72821	3.52e-09	1.46e-07	10.9225
SH2B2	-1.04708	7.31446	-7.71192	3.69e-09	1.5e-07	10.8747
LINC01111	-1.40987	4.02828	-7.70211	3.8e-09	1.54e-07	10.846
RP11-2E11.9	-1.40245	5.27547	-7.65637	4.35e-09	1.73e-07	10.7116
GLIDR	-1.0432	5.8025	-7.63802	4.6e-09	1.8e-07	10.6577
LOC100131541	-1.92268	4.52057	-7.59235	5.27e-09	2.02e-07	10.5233
NOTCH2NL	-1.82507	7.78996	-7.5696	5.64e-09	2.12e-07	10.4562
LOC286437	-1.82009	6.62368	-7.56499	5.72e-09	2.14e-07	10.4426
FAM13A-AS1	-1.09127	4.53836	-7.55817	5.83e-09	2.17e-07	10.4225
BPTF	-1.48969	4.38174	-7.54996	5.98e-09	2.22e-07	10.3983
MYCBP2	-1.01099	6.02308	-7.51187	6.7e-09	2.45e-07	10.2859
BC048997	-1.62863	4.12946	-7.50229	6.89e-09	2.51e-07	10.2576
LOC285696	-1.12302	3.45656	-7.48818	7.19e-09	2.6e-07	10.2159
LINC00537	-1.00319	5.65502	-7.45029	8.05e-09	2.87e-07	10.1038
MEF2C	-1.31869	5.22227	-7.44036	8.3e-09	2.94e-07	10.0744
E2F6	-1.68929	6.57031	-7.39582	9.48e-09	3.26e-07	9.94249
MZT2B	-1.16852	8.74526	-7.39248	9.58e-09	3.29e-07	9.93257
LOC100272216	-1.44126	5.13833	-7.37516	1.01e-08	3.43e-07	9.88121
SYK	-1.06954	6.75895	-7.36441	1.04e-08	3.52e-07	9.84931
ERBB2IP	-1.06088	4.09942	-7.28059	1.34e-08	4.37e-07	9.60029
TPD52	-1.64927	4.30766	-7.2715	1.38e-08	4.48e-07	9.57324
LOC100130232	-2.46904	5.27292	-7.25672	1.44e-08	4.64e-07	9.52925
FOXP1-IT1	-1.47479	5.62617	-7.24573	1.49e-08	4.74e-07	9.49655
MIR646HG	-1.66306	4.40078	-7.24489	1.49e-08	4.75e-07	9.49405
ACSM2A	-1.11613	3.73358	-7.20392	1.69e-08	5.27e-07	9.37196
LINC01153	-1.35314	3.2719	-7.08823	2.4e-08	7.02e-07	9.02654
MEIS3P1	-1.53393	4.92285	-7.08065	2.45e-08	7.16e-07	9.00385
MOB3B	-1.21769	3.90761	-7.03401	2.82e-08	8.03e-07	8.86427
LOC401176	-1.07933	3.12256	-7.02475	2.91e-08	8.14e-07	8.83652
POTEM	-1.52237	5.34874	-7.02344	2.92e-08	8.15e-07	8.83261
GOLGA4	-1.23331	4.64569	-7.01023	3.04e-08	8.45e-07	8.79304
AC092620.2	-1.77644	5.49733	-6.9803	3.33e-08	9.13e-07	8.70329
LINC01104	-1.20984	4.1526	-6.95743	3.56e-08	9.66e-07	8.63471
LOC101927550	-1.16491	3.84266	-6.9072	4.15e-08	1.1e-06	8.4839
AX746823	-1.05927	5.47419	-6.87665	4.56e-08	1.19e-06	8.39211
LOC100506699	-1.48719	4.08054	-6.87525	4.58e-08	1.19e-06	8.3879
C11orf80	-1.28497	4.27395	-6.84997	4.94e-08	1.27e-06	8.31187
TAPT1-AS1	-1.54564	5.71535	-6.8135	5.52e-08	1.39e-06	8.20213
ATP10D	-1.81085	4.02733	-6.79098	5.92e-08	1.47e-06	8.13433
KB-1568E2.1	-1.47088	3.31755	-6.77368	6.24e-08	1.53e-06	8.08221
FAM3C	-1.04204	3.05794	-6.76057	6.49e-08	1.58e-06	8.04272
RP11-515O17.3	-1.33908	5.25997	-6.75105	6.68e-08	1.62e-06	8.01402
UGP2	-1.20773	6.50528	-6.73932	6.93e-08	1.66e-06	7.97866
RGSL1	-1.1834	3.27061	-6.73154	7.09e-08	1.69e-06	7.95521
LOC100128751	-1.10504	4.64208	-6.73123	7.1e-08	1.69e-06	7.95426
AGBL1	-1.68422	4.70499	-6.71881	7.38e-08	1.75e-06	7.91682
FAM214A	-1.90008	4.54549	-6.6921	8e-08	1.87e-06	7.83623
KANK4	-1.58043	5.07913	-6.67437	8.45e-08	1.95e-06	7.78273
ITGA9-AS1	-1.08808	3.36831	-6.65219	9.04e-08	2.07e-06	7.71576
LOC101927286	-1.38883	3.58501	-6.56309	1.19e-07	2.63e-06	7.44649
GSTA4	-1.10004	4.99035	-6.56255	1.19e-07	2.63e-06	7.44484
ADAT1	-1.10536	5.09862	-6.49887	1.45e-07	3.14e-06	7.25215
AC007401.2	-1.57913	4.5053	-6.48512	1.51e-07	3.26e-06	7.21051
RP11-27I1.6	-1.25045	4.01882	-6.48415	1.51e-07	3.27e-06	7.20759
RSAD2	-1.22122	4.56301	-6.45859	1.64e-07	3.49e-06	7.13017
FOXO1	-1.01167	4.91021	-6.4583	1.64e-07	3.49e-06	7.12929
ARHGEF18	-1.28469	9.65858	-6.45479	1.66e-07	3.52e-06	7.11867
TRIM78P	-1.41303	4.36155	-6.43585	1.76e-07	3.7e-06	7.06128
DGKD	-1.18321	7.81728	-6.42444	1.82e-07	3.81e-06	7.02671
LOC101929340	-1.58078	4.289	-6.41612	1.87e-07	3.89e-06	7.00149
CRIM1	-1.31297	4.29287	-6.36893	2.16e-07	4.41e-06	6.85841
CTD-2165H16.3	-1.60218	4.15717	-6.36701	2.17e-07	4.41e-06	6.85258
SMIM14	-1.25852	4.237	-6.36507	2.18e-07	4.44e-06	6.84669
LOC200609	-1.23792	4.87309	-6.35549	2.25e-07	4.56e-06	6.81766
LOC100131043	-1.72315	5.34263	-6.35428	2.26e-07	4.57e-06	6.81398
OIP5-AS1	-1.12657	5.18498	-6.33497	2.39e-07	4.83e-06	6.75539
DRD5	-1.26515	4.84636	-6.28006	2.84e-07	5.55e-06	6.58877
STAP1	-1.77421	5.34356	-6.27165	2.91e-07	5.68e-06	6.56323
EVI2B	-1.90592	5.14545	-6.26718	2.95e-07	5.73e-06	6.54966
POM121L8P	-1.30238	4.66464	-6.26366	2.98e-07	5.79e-06	6.53897
RP11-318A15.2	-1.27211	4.71276	-6.21562	3.46e-07	6.59e-06	6.39308
CPNE5	-1.08919	5.40824	-6.19357	3.7e-07	6.99e-06	6.3261
KIAA0355	-1.44323	6.01283	-6.19299	3.71e-07	6.99e-06	6.32434
RP11-271C24.3	-1.73523	4.28623	-6.17131	3.96e-07	7.39e-06	6.25847
RP11-642D21.1	-1.10032	2.77486	-6.1677	4.01e-07	7.44e-06	6.2475
RP4-773N10.4	-1.01817	4.39365	-6.15454	4.17e-07	7.68e-06	6.20755
SEC14L1P1	-1.24381	5.89282	-6.14217	4.34e-07	7.92e-06	6.16994
HOXD8	-1.68161	4.60567	-6.12278	4.6e-07	8.28e-06	6.11101
LSM14A	-1.07024	5.64987	-6.09356	5.04e-07	8.97e-06	6.0222
AL833181	-2.0494	5.74672	-6.06943	5.43e-07	9.59e-06	5.94884
ALOX5	-1.17752	5.01792	-6.06428	5.52e-07	9.7e-06	5.9332
CTD-2541M15.1	-1.48273	4.60026	-6.06308	5.54e-07	9.73e-06	5.92955
RPS16P5	-1.51662	4.14648	-6.02674	6.19e-07	1.07e-05	5.81906
LINC00708	-1.27446	3.68732	-6.02446	6.24e-07	1.08e-05	5.81214
PAN3	-1.28846	7.83146	-6.01759	6.37e-07	1.1e-05	5.79124
RP4-635E18.8	-1.57696	4.68765	-5.97688	7.22e-07	1.21e-05	5.66744
HYMAI	-1.14323	4.74046	-5.97317	7.31e-07	1.22e-05	5.65617
SLC35G3	-1.17316	4.89968	-5.91837	8.66e-07	1.4e-05	5.48952
LCOR	-1.16825	3.54827	-5.89385	9.34e-07	1.5e-05	5.41495
RP11-166P13.4	-1.11195	3.79357	-5.87129	1e-06	1.59e-05	5.34636
RRN3P3	-1.08626	3.66927	-5.81125	1.21e-06	1.87e-05	5.16378
DEF8	-1.80646	6.97536	-5.80086	1.24e-06	1.92e-05	5.1322
IGHD	-1.56749	5.069	-5.76379	1.4e-06	2.12e-05	5.0195
SEL1L3	-1.5216	5.57397	-5.74502	1.48e-06	2.22e-05	4.96246
LOC101927451	-1.12708	4.25668	-5.73766	1.51e-06	2.26e-05	4.94009
ZNF137P	-1.18703	4.91143	-5.71331	1.63e-06	2.41e-05	4.86607
RP5-1065J22.8	-1.12326	5.01285	-5.71071	1.64e-06	2.43e-05	4.85818
STBD1	-1.05318	4.22366	-5.70692	1.66e-06	2.44e-05	4.84664
ZCCHC7	-1.01374	4.52898	-5.68407	1.79e-06	2.6e-05	4.77722
RP11-847H18.2	-1.08488	3.8941	-5.60523	2.28e-06	3.24e-05	4.53777
DQ592442	-1.8078	6.50244	-5.56544	2.58e-06	3.6e-05	4.41696
LOC100505874	-1.09591	4.27424	-5.5588	2.63e-06	3.66e-05	4.39683
LOC339988	-1.06057	5.96174	-5.55041	2.7e-06	3.74e-05	4.37137
LOC100996902	-1.54538	3.53225	-5.54121	2.78e-06	3.83e-05	4.34345
NLRC3	-1.72827	7.2376	-5.52998	2.88e-06	3.95e-05	4.30937
AGAP9	-1.4078	4.5396	-5.51341	3.03e-06	4.13e-05	4.25911
TSC1	-1.44272	6.07601	-5.50077	3.15e-06	4.28e-05	4.22077
DDHD2	-1.28351	5.94522	-5.49434	3.21e-06	4.35e-05	4.20128
CR2	-1.10619	3.66477	-5.44371	3.75e-06	4.96e-05	4.04783
DNAJC10	-1.22333	4.06902	-5.41831	4.06e-06	5.27e-05	3.97087
ABCB4	-1.51284	4.38166	-5.38362	4.52e-06	5.75e-05	3.86583
TOP2B	-1.23027	6.84511	-5.30726	5.72e-06	7.05e-05	3.63488
FCRL1	-2.35162	5.74316	-5.29193	6e-06	7.35e-05	3.58857
LIPT1	-1.2729	4.17567	-5.28679	6.09e-06	7.45e-05	3.57303
TSPAN13	-1.54429	7.5387	-5.28617	6.11e-06	7.46e-05	3.57116
PSIP1	-1.01261	4.2875	-5.24867	6.85e-06	8.25e-05	3.45793
DQ599616	-1.12418	4.28525	-5.22754	7.31e-06	8.72e-05	3.39417
BC048132	-1.05991	3.0035	-5.16539	8.86e-06	0.000102577	3.20683
FNBP1	-1.09675	5.9938	-5.11407	1.04e-05	0.00011693	3.05237
MAP2K1	-1.14514	6.2244	-5.09555	1.1e-05	0.000122927	2.99667
UHRF2	-1.13586	6.85816	-5.03215	1.33e-05	0.000145224	2.80628
DMXL1	-1.21641	4.03789	-5.01425	1.41e-05	0.000152196	2.75263
LOC100507311	-1.33978	3.35992	-5.01288	1.42e-05	0.000152611	2.7485
C1orf106	-1.05734	3.72838	-4.98829	1.53e-05	0.000162299	2.67483
EBLN3	-1.14576	6.15819	-4.98587	1.54e-05	0.000163348	2.66758
KB-431C1.4	-1.11616	3.07155	-4.98227	1.55e-05	0.000164759	2.65678
ZNF439	-1.13495	3.58427	-4.94039	1.77e-05	0.000184341	2.53144
ANKRD36B	-1.08928	3.0618	-4.93791	1.78e-05	0.000185476	2.52404
NR3C1	-1.328	5.6094	-4.93075	1.82e-05	0.000188682	2.50262
DMTF1	-1.17799	5.73472	-4.92854	1.83e-05	0.00018987	2.49602
C8orf60	-1.17545	5.72345	-4.89273	2.04e-05	0.00020955	2.38907
PBX3	-1.06004	5.28056	-4.89196	2.05e-05	0.000209749	2.38676
BANK1	-1.65771	5.81271	-4.81575	2.59e-05	0.000255785	2.15966
GLTSCR1L	-1.00307	5.18245	-4.7424	3.24e-05	0.000309675	1.94179
SETBP1	-1.25008	5.05636	-4.68169	3.89e-05	0.000362676	1.76202
DAAM1	-1.00555	4.3144	-4.60728	4.88e-05	0.000440289	1.54243
TSPYL5	-1.10622	2.53382	-4.59884	5e-05	0.000449252	1.51758
GPR160	-2.41378	5.63875	-4.56765	5.5e-05	0.000487444	1.42584
RNF111	-1.31499	5.39001	-4.43501	8.2e-05	0.000684196	1.03761
LOC145474	-1.37383	3.8864	-4.39484	9.25e-05	0.000758465	0.920643
LOC100505851	-1.00887	3.09027	-4.37198	9.91e-05	0.000803129	0.85424
WDR11	-1.02099	5.2928	-4.34592	0.000107106	0.000855777	0.778684
TMEM154	-1.39198	5.85408	-4.34073	0.000108783	0.000865345	0.763636
SACM1L	-1.1551	5.47917	-4.29739	0.000123819	0.000964061	0.638291
SWAP70	-1.36314	5.10578	-4.26777	0.00013525	0.00103373	0.552858
EPS15	-1.38289	6.02035	-4.25521	0.000140401	0.00106821	0.516701
CD55	-1.22827	4.52479	-4.25285	0.000141391	0.00107347	0.509908
LPP	-1.06175	4.25711	-4.22949	0.00015156	0.00113555	0.44276
ARHGEF6	-1.0028	6.76629	-4.20365	0.00016365	0.0012098	0.368594
REL	-1.09852	3.49488	-4.15641	0.000188235	0.00136089	0.233431
ADD3	-1.25421	5.47026	-4.08997	0.000229017	0.00160483	0.0442558
HHEX	-1.15419	3.57195	-4.07253	0.000241086	0.00167261	-0.00524247
PAG1	-1.63979	5.13224	-4.06658	0.000245341	0.00169887	-0.0221023
PLEKHF2	-1.31241	4.34926	-4.03482	0.00026933	0.0018293	-0.11196
PELI1	-1.18381	5.09929	-4.03097	0.00027239	0.00184545	-0.122839
LINC01305	-1.77552	4.35523	-3.95317	0.00034199	0.00222396	-0.341749
RNF103	-1.16189	4.7826	-3.89648	0.00040333	0.00254838	-0.500223
FAM107B	-1.23286	6.11225	-3.80597	0.000524038	0.00318825	-0.751281
ERP27	-1.21729	4.89328	-3.73669	0.000639455	0.0037539	-0.941782
BACH2	-1.31542	4.83712	-3.73542	0.000641774	0.00376493	-0.945244
UBE2J1	-1.40845	5.55748	-3.70842	0.000693312	0.00399264	-1.01907
KLHDC2	-1.17099	6.62316	-3.66615	0.000782114	0.00441709	-1.13416
C16orf54	-1.31141	4.96462	-3.65884	0.000798548	0.00449817	-1.154
RP11-589P10.5	-1.04384	5.65616	-3.55156	0.00108161	0.0057956	-1.44306
VPREB3	-1.01895	4.99878	-3.52877	0.00115313	0.00611979	-1.50395
MBD4	-1.01112	5.25226	-3.49266	0.00127585	0.00666165	-1.60002
RASGRP1	-1.1149	5.07463	-3.42184	0.00155395	0.0078043	-1.78703
USP32P2	-1.5185	3.20153	-3.39847	0.00165785	0.00821638	-1.84831
IFI44L	-1.31172	3.70172	-3.37101	0.00178845	0.00876735	-1.92005
ZNF600	-1.02173	6.2597	-3.32847	0.00201043	0.00964158	-2.0306
LOC100996412	-1.35269	5.82146	-3.25219	0.00247584	0.0114574	-2.22694
MYBL1	-1.34817	4.49902	-3.18386	0.00297839	0.013391	-2.4007
DPEP2	-1.14613	5.20471	-3.06207	0.00412283	0.0174632	-2.70523
FCGR2B	-1.1725	5.46324	-3.04257	0.00434091	0.0182194	-2.75336
IRF8	-1.14407	9.56579	-3.02427	0.00455535	0.0189577	-2.79834
VNN2	-1.29238	5.24574	-2.95873	0.0054084	0.0218853	-2.95815
LOC100129447	-1.41274	6.20788	-2.93828	0.00570399	0.0228128	-3.00759
FHOD3	-1.38746	3.57871	-2.87362	0.00674113	0.0261283	-3.16247
ACADM	-1.13029	5.96325	-2.82893	0.00755861	0.0287134	-3.26828
LINC00487	-1.7668	2.95257	-2.6608	0.0115349	0.0402846	-3.65666
MME	-1.22627	3.47523	-2.60415	0.0132616	0.0449592	-3.78395

## Sheet: 109 clustered DEGs
109 highly connected DEGs from the top 3 clusters (Cytoscape MCODE plug-in)
Gene symbol	MCODE_Cluster	MCODE_Node_Status	MCODE_Score
CHCHD1	Cluster 1	Clustered	27
MRPL32	Cluster 1	Clustered	27
MRPL27	Cluster 1	Clustered	27
MRPL51	Cluster 1	Clustered	27
MRPS7	Cluster 1	Clustered	28
MRPL34	Cluster 1	Clustered	27
MRPL4	Cluster 1	Clustered	27
MRPS36	Cluster 1	Clustered	27
MRPL3	Cluster 1	Clustered	27
MRPS28	Cluster 1	Clustered	27
MRPL17	Cluster 1	Clustered	27
MRPL33	Cluster 1	Clustered	27
MRPL11	Cluster 1	Clustered	27
TUFM	Cluster 1	Clustered	27
MRPL54	Cluster 1	Clustered	27
MRPL40	Cluster 1	Clustered	27
MRPL43	Cluster 1	Clustered	27
MRPL52	Cluster 1	Clustered	27
MRPL21	Cluster 1	Clustered	27
MRPL18	Cluster 1	Clustered	27
MRPS2	Cluster 1	Clustered	27
MRPL14	Cluster 1	Clustered	27
MRPS18A	Cluster 1	Clustered	27
MRPL22	Cluster 1	Clustered	27
MRPS21	Cluster 1	Clustered	27
MRPL36	Cluster 1	Clustered	27
MRPL47	Cluster 1	Clustered	27
MRPS33	Cluster 1	Clustered	27
RPL10L	Cluster 1	Clustered	32
RPL39L	Cluster 1	Clustered	32
RPL39	Cluster 1	Clustered	32
RPL36AL	Cluster 1	Clustered	32
RPL22L1	Cluster 1	Clustered	32
RPL38	Cluster 1	Clustered	32
RPL30	Cluster 1	Clustered	32
RPL35	Cluster 1	Clustered	32
RPL31	Cluster 1	Clustered	32
RPL26L1	Cluster 1	Clustered	32
RPL27A	Cluster 1	Clustered	32
RPL14	Cluster 1	Clustered	32
RPL24	Cluster 1	Clustered	32
RPL12	Cluster 1	Clustered	32
RPL29	Cluster 1	Clustered	32
RPL11	Cluster 1	Clustered	32
RPL8	Cluster 1	Clustered	32
RPLP2	Cluster 1	Clustered	32
RPL36	Cluster 1	Clustered	32
RPS7	Cluster 1	Clustered	32
FAU	Cluster 1	Clustered	32
RPS12	Cluster 1	Clustered	32
RPS3	Cluster 1	Clustered	32
SSR4	Cluster 1	Clustered	32
RPS27L	Cluster 1	Clustered	32
RPS21	Cluster 1	Clustered	32
RPS17	Cluster 1	Clustered	32
SEC61G	Cluster 1	Clustered	32
RPS18	Cluster 1	Clustered	32
RPS24	Cluster 1	Clustered	32
RPS25	Cluster 1	Clustered	32
RPS19	Cluster 1	Clustered	32
RPS5	Cluster 1	Seed	32
UQCRC1	Cluster 2	Clustered	20
NDUFAB1	Cluster 2	Clustered	21.2479
NDUFA6	Cluster 2	Clustered	21.2479
NDUFB5	Cluster 2	Clustered	21.2479
UQCR11	Cluster 2	Clustered	20.917
NDUFA8	Cluster 2	Clustered	21.2479
UQCRQ	Cluster 2	Clustered	21.8406
NDUFS6	Cluster 2	Clustered	21.2479
NDUFB11	Cluster 2	Clustered	21.9203
NDUFV2	Cluster 2	Clustered	21.2479
NDUFB9	Cluster 2	Clustered	21.2479
UQCRFS1	Cluster 2	Clustered	20.917
NDUFB10	Cluster 2	Clustered	21.2479
NDUFS3	Cluster 2	Clustered	21.2479
NDUFA1	Cluster 2	Clustered	21.2479
NDUFB2	Cluster 2	Clustered	21.2479
NDUFA3	Cluster 2	Clustered	21.2479
NDUFB3	Cluster 2	Clustered	21.2479
NDUFA4	Cluster 2	Clustered	22
NDUFA9	Cluster 2	Clustered	21.2479
NDUFA12	Cluster 2	Clustered	21.2479
NDUFA11	Cluster 2	Clustered	21.2479
NDUFA13	Cluster 2	Clustered	21.2479
MT-ND2	Cluster 2	Clustered	21.9203
MT-ND4	Cluster 2	Clustered	21.9203
NDUFAF2	Cluster 2	Seed	22
NDUFB1	Cluster 2	Clustered	21.2479
NDUFC1	Cluster 2	Clustered	21.2479
GNG5	Cluster 3	Clustered	19
GNG7	Cluster 3	Clustered	19
GNGT2	Cluster 3	Clustered	19
C3	Cluster 3	Clustered	19
PSAP	Cluster 3	Clustered	19
C3AR1	Cluster 3	Clustered	19
FPR1	Cluster 3	Clustered	19
HEBP1	Cluster 3	Clustered	19
PNOC	Cluster 3	Clustered	19
CCR10	Cluster 3	Clustered	19
CXCL16	Cluster 3	Clustered	19
CCR1	Cluster 3	Clustered	19
CCR5	Cluster 3	Clustered	19
CXCL13	Cluster 3	Clustered	19
CCL19	Cluster 3	Clustered	19
CCL4	Cluster 3	Clustered	19
CXCL9	Cluster 3	Clustered	19
CXCL12	Cluster 3	Clustered	19
CXCL10	Cluster 3	Clustered	19
CCL5	Cluster 3	Seed	19

## Sheet: WGCNA 
369 high connectivity weighted gene co-expression network analysis (WGCNA) genes									195 functionally important wgcna genes (String database highest confidence of 0.9, unconnected nodes hidden
Gene symbol	Module color	GS.Surtime	p.GS.Surtime	MM.turquoise	p.MM.turquoise				shared name	SUID	MCODE_Cluster	MCODE_Node_Status	MCODE_Score
ATOX1	turquoise	0.955012	5.47384e-19	0.960322	7.16856e-20				A2M	72	Cluster 12	Clustered	3
ENPP2	turquoise	0.951674	1.73933e-18	0.877367	4.65733e-12				SPARC	73	Cluster 12	Clustered	3
RNA45S5	turquoise	0.944685	1.53322e-17	0.896125	3.47728e-13				VWF	75	Cluster 12	Clustered	3
RAB13	turquoise	0.943066	2.4377e-17	0.875546	5.85662e-12				CFD	77	Cluster 12	Seed	3
RARRES2	turquoise	0.933503	2.94005e-16	0.863266	2.51535e-11				MMP9	79	Cluster 8	Clustered	4
TXN	turquoise	0.932646	3.60855e-16	0.91718	9.72204e-15				ANAPC15	81		Unclustered	3
GPX4	turquoise	0.930623	5.79108e-16	0.936497	1.40624e-16				PSMB5	82		Unclustered	4
AKIP1	turquoise	0.93006	6.58918e-16	0.859386	3.87245e-11				PSMA7	84		Unclustered	4
CSTA	turquoise	0.924899	2.05172e-15	0.840868	2.57953e-10				UBA52	86	Cluster 1	Clustered	24
COX7C	turquoise	0.918542	7.47196e-15	0.957836	1.918e-19				AP2S1	88	Cluster 8	Clustered	5
PLAU	turquoise	0.916831	1.03939e-14	0.809581	3.89129e-09				M6PR	89	Cluster 8	Clustered	5
ITPA	turquoise	0.912735	2.2273e-14	0.89446	4.46346e-13				CD3D	91	Cluster 8	Clustered	5
IFT43	turquoise	0.908338	4.84758e-14	0.922889	3.12474e-15				VAMP8	93	Cluster 8	Clustered	5
LOC101927609	turquoise	0.908242	4.92763e-14	0.836437	3.91922e-10				CLTB	96	Cluster 8	Clustered	5
NDUFAF2	turquoise	0.907784	5.33172e-14	0.93856	8.28106e-17				APOC1	98		Unclustered	0
C11orf96	turquoise	0.907252	5.83833e-14	0.817452	2.06451e-09				APOE	99	Cluster 9	Clustered	4
LGALS3	turquoise	0.905135	8.33638e-14	0.907454	5.64038e-14				LGALS1	101	Cluster 9	Clustered	4
PSMB5	turquoise	0.903468	1.09722e-13	0.934181	2.49553e-16				C3	103	Cluster 5	Clustered	7
MRPL14	turquoise	0.902252	1.33655e-13	0.936282	1.48439e-16				LAMB2	105	Cluster 9	Clustered	4
RPS19	turquoise	0.901821	1.43242e-13	0.887392	1.23206e-12				IGFBP7	107	Cluster 9	Seed	4
ZBED6CL	turquoise	0.90155	1.49605e-13	0.828421	8.10135e-10				APRT	109	Cluster 15	Clustered	2
C19orf70	turquoise	0.901403	1.53162e-13	0.911589	2.73833e-14				GUK1	110	Cluster 15	Clustered	2
TP53TG1	turquoise	0.900713	1.70918e-13	0.923311	2.86287e-15				ITPA	112	Cluster 15	Seed	2
HINT1	turquoise	0.899625	2.02898e-13	0.901039	1.62299e-13				ATP5E	114		Unclustered	4.8
C1orf53	turquoise	0.896618	3.22718e-13	0.81769	2.02434e-09				NDUFA1	115	Cluster 2	Clustered	10
EIF4EBP1	turquoise	0.895325	3.92257e-13	0.859466	3.83851e-11				NDUFS6	117	Cluster 2	Clustered	10
PRKCDBP	turquoise	0.893532	5.12066e-13	0.801838	7.06012e-09				NDUFB2	119	Cluster 2	Clustered	10
RP3-486D24.1	turquoise	0.892935	5.58978e-13	0.851933	8.56586e-11				NDUFA6	121	Cluster 2	Clustered	10
TIMM8B	turquoise	0.892882	5.63315e-13	0.949804	3.20847e-18				COX6C	123	Cluster 13	Clustered	7.15152
ZDHHC24	turquoise	0.892671	5.80988e-13	0.853526	7.25569e-11				NDUFA3	125	Cluster 2	Clustered	10
BATF	turquoise	0.891555	6.83264e-13	0.900777	1.6921e-13				UQCRQ	127	Cluster 2	Clustered	10
UXT	turquoise	0.889971	8.57423e-13	0.919354	6.3726e-15				COX7C	129	Cluster 2	Clustered	8
FAM162A	turquoise	0.888571	1.04497e-12	0.855456	5.91796e-11				USMG5	131		Unclustered	5.78571
RAB42	turquoise	0.887791	1.16541e-12	0.829974	7.05887e-10				ATP5G1	133	Cluster 7	Clustered	3.73333
TOPORS-AS1	turquoise	0.885881	1.51729e-12	0.838909	3.10831e-10				ATP5I	135	Cluster 13	Clustered	7.82222
COX14	turquoise	0.884117	1.92797e-12	0.934532	2.29097e-16				TIMM13	137	Cluster 7	Clustered	3.73333
GGCX	turquoise	0.882725	2.32268e-12	0.952767	1.20221e-18				TOMM22	139	Cluster 7	Clustered	4
NDUFB1	turquoise	0.881078	2.88692e-12	0.918459	7.59411e-15				TIMM10	141	Cluster 7	Clustered	3.73333
C4orf48	turquoise	0.881028	2.90576e-12	0.89427	4.59138e-13				COA4	144		Unclustered	2
HSPE1	turquoise	0.879355	3.61165e-12	0.914771	1.53218e-14				CMC4	146		Unclustered	2
PIN4	turquoise	0.878946	3.8072e-12	0.803051	6.44185e-09				TOMM5	149		Unclustered	3
ATP5G1	turquoise	0.878616	3.97157e-12	0.942918	2.54153e-17				BCS1L	151	Cluster 7	Clustered	3.73333
APRT	turquoise	0.878274	4.14944e-12	0.907805	5.31203e-14				TIMM8B	153	Cluster 7	Seed	4
COX5B	turquoise	0.877977	4.30966e-12	0.939491	6.48229e-17				UQCR11	155	Cluster 2	Clustered	10
RPS25	turquoise	0.877722	4.4521e-12	0.851503	8.95614e-11				COX5B	157	Cluster 13	Seed	7.82222
GSTO1	turquoise	0.877496	4.58218e-12	0.927817	1.09062e-15				NDUFB9	160	Cluster 2	Clustered	10
GZMH	turquoise	0.876894	4.94457e-12	0.796181	1.07346e-08				C14orf2	162		Unclustered	2
NIT2	turquoise	0.876851	4.97151e-12	0.927015	1.30097e-15				UQCRB	168	Cluster 2	Clustered	9
RP3-507I15.1	turquoise	0.876594	5.13587e-12	0.823123	1.28304e-09				ATP6V0C	173	Cluster 10	Clustered	3
RPL41	turquoise	0.876453	5.22724e-12	0.800926	7.55987e-09				CYSTM1	174		Unclustered	4
ATP5E	turquoise	0.876132	5.44294e-12	0.846837	1.4386e-10				LAMTOR1	177	Cluster 10	Clustered	3.2381
RBX1	turquoise	0.875505	5.88708e-12	0.887776	1.16789e-12				BRI3	179	Cluster 8	Clustered	4
BLOC1S1	turquoise	0.875409	5.95803e-12	0.895944	3.57392e-13				PLAU	181	Cluster 10	Clustered	3.73333
SH2D2A	turquoise	0.875277	6.05679e-12	0.81883	1.84195e-09				LAMTOR2	183	Cluster 10	Seed	3.73333
COX6C	turquoise	0.874824	6.40724e-12	0.945034	1.38442e-17				LAMP1	185	Cluster 8	Clustered	4
UQCRB	turquoise	0.87477	6.4502e-12	0.871853	9.22118e-12				BLOC1S1	195		Unclustered	0
C14orf2	turquoise	0.873814	7.25869e-12	0.92664	1.41184e-15				SNAPIN	196		Unclustered	3
ARMC10	turquoise	0.87324	7.78919e-12	0.92945	7.57031e-16				BLVRA	198		Unclustered	0
SERPINF1	turquoise	0.873233	7.79563e-12	0.832542	5.60404e-10				BLVRB	199		Unclustered	0
UQCR11	turquoise	0.871095	1.01038e-11	0.943098	2.41601e-17				BTBD6	204	Cluster 6	Clustered	5.78571
PPP1R14B	turquoise	0.870622	1.06937e-11	0.891594	6.79426e-13				RBX1	205	Cluster 6	Clustered	5.78571
CKLF	turquoise	0.869797	1.18017e-11	0.831718	6.03701e-10				NEDD8	207	Cluster 6	Clustered	6
MRPS17	turquoise	0.869036	1.29161e-11	0.949467	3.57398e-18				RNF7	209	Cluster 6	Clustered	5.78571
RP3-334F4.1	turquoise	0.868648	1.35204e-11	0.791557	1.49753e-08				RBCK1	211	Cluster 6	Seed	6
C15orf61	turquoise	0.868572	1.36427e-11	0.887837	1.15796e-12				FBXO6	213	Cluster 6	Clustered	5.78571
VAMP8	turquoise	0.867849	1.48512e-11	0.895451	3.84945e-13				UBE2F	216	Cluster 6	Clustered	5.78571
HIGD2A	turquoise	0.867561	1.53611e-11	0.860672	3.36118e-11				C19orf70	219		Unclustered	0
MRPL21	turquoise	0.86667	1.70381e-11	0.951097	2.10611e-18				CHCHD6	220		Unclustered	0
CD3D	turquoise	0.866204	1.79832e-11	0.804916	5.58871e-09				HEBP1	222	Cluster 5	Clustered	7
POLR2H	turquoise	0.866177	1.80391e-11	0.914475	1.6186e-14				CTSC	225	Cluster 8	Clustered	5
CECR5	turquoise	0.866151	1.80942e-11	0.839231	3.01498e-10				PA2G4	227	Cluster 8	Clustered	5
C7orf55	turquoise	0.865533	1.94302e-11	0.89776	2.71017e-13				IFITM1	230		Unclustered	0
RPL12	turquoise	0.864819	2.10864e-11	0.867478	1.55095e-11				FTL	232	Cluster 8	Clustered	5
FAU	turquoise	0.864759	2.12303e-11	0.898141	2.5557e-13				PYCARD	234	Cluster 8	Clustered	5
RNF145	turquoise	0.863922	2.33531e-11	0.871471	9.65675e-12				CXCL13	236	Cluster 5	Clustered	7
STOML1	turquoise	0.863896	2.34235e-11	0.850701	9.7271e-11				CCL4	239	Cluster 5	Clustered	7
NDUFA3	turquoise	0.863696	2.39603e-11	0.958576	1.44004e-19				CXCL9	241	Cluster 5	Clustered	7
RPS10L	turquoise	0.863315	2.50154e-11	0.832611	5.56895e-10				CXCL12	243	Cluster 5	Clustered	7
HDAC3	turquoise	0.863279	2.51172e-11	0.858863	4.10017e-11				CXCL10	245	Cluster 5	Clustered	7
NDUFA1	turquoise	0.86293	2.61251e-11	0.847776	1.30941e-10				CCL5	247	Cluster 5	Seed	7
G0S2	turquoise	0.862726	2.67299e-11	0.800595	7.74951e-09				LYZ	249	Cluster 8	Seed	5
MRPL33	turquoise	0.862574	2.71909e-11	0.909234	4.15005e-14				CD14	263		Unclustered	0
PTRHD1	turquoise	0.862529	2.73305e-11	0.908114	5.03764e-14				CD8A	269		Unclustered	0
NOP10	turquoise	0.86245	2.75713e-11	0.899867	1.95357e-13				CDK4	271		Unclustered	2
PCOLCE	turquoise	0.861381	3.10699e-11	0.770318	6.25212e-08				COPRS	272		Unclustered	2
NDUFB2	turquoise	0.861284	3.14057e-11	0.930874	5.46536e-16				H2AFJ	274		Unclustered	3.73333
RPS7	turquoise	0.861274	3.1441e-11	0.876711	5.06064e-12				CHI3L1	278		Unclustered	3
BOLA3	turquoise	0.860972	3.25144e-11	0.893778	4.93781e-13				CYFIP1	279	Cluster 8	Clustered	4
EBI3	turquoise	0.860548	3.40772e-11	0.80385	6.06277e-09				NIT2	281	Cluster 8	Clustered	4
LAMP1	turquoise	0.859666	3.75521e-11	0.772185	5.54789e-08				CKLF	284		Unclustered	0
RPS21	turquoise	0.859203	3.95065e-11	0.843637	1.97326e-10				CMTM3	285		Unclustered	0
MSRB1	turquoise	0.859048	4.01846e-11	0.924933	2.0369e-15				COL1A2	290	Cluster 14	Clustered	2
COX8A	turquoise	0.858264	4.3764e-11	0.9092	4.17462e-14				PCOLCE	291		Unclustered	0
MGAT4B	turquoise	0.858165	4.42399e-11	0.914428	1.63287e-14				COL6A3	294	Cluster 14	Clustered	2
SLIRP	turquoise	0.857246	4.88618e-11	0.9008	1.68585e-13				COL4A2	296	Cluster 14	Seed	2
TOMM5	turquoise	0.857235	4.89193e-11	0.952344	1.38836e-18				COX7A1	301		Unclustered	6
NENF	turquoise	0.857153	4.93531e-11	0.840824	2.59035e-10				NDUFA11	305	Cluster 2	Clustered	10
VWF	turquoise	0.856752	5.15288e-11	0.773569	5.07407e-08				COX8A	308		Unclustered	4
TAF10	turquoise	0.856103	5.5238e-11	0.929466	7.54258e-16				COX7B	310		Unclustered	5.78571
LSM4	turquoise	0.855673	5.7832e-11	0.878223	4.17693e-12				NDUFB3	316	Cluster 2	Clustered	10
RPS16	turquoise	0.855611	5.82129e-11	0.90379	1.0409e-13				CSTA	346		Unclustered	0
RPL36	turquoise	0.855206	6.07751e-11	0.852552	8.03296e-11				CTSB	347		Unclustered	0
UFC1	turquoise	0.855074	6.16324e-11	0.903352	1.11831e-13				TRAPPC5	349		Unclustered	0
CARD16	turquoise	0.854825	6.32786e-11	0.789797	1.6962e-08				FTH1	366	Cluster 8	Clustered	4
CSRP2	turquoise	0.853921	6.96147e-11	0.770819	6.05531e-08				DDRGK1	373		Unclustered	0
SNAPIN	turquoise	0.853035	7.63881e-11	0.951686	1.73206e-18				UFC1	374		Unclustered	0
RPS17	turquoise	0.85261	7.98487e-11	0.813564	2.83411e-09				DECR2	376		Unclustered	0
PNPO	turquoise	0.852502	8.0749e-11	0.879335	3.62093e-12				EIF4EBP1	378		Unclustered	2
DNPH1	turquoise	0.852135	8.38861e-11	0.83763	3.50599e-10				ENSG00000229117	381		Unclustered	6
TNFRSF10B	turquoise	0.851996	8.51095e-11	0.761867	1.05931e-07				RPS21	382	Cluster 1	Clustered	24
LOC284889	turquoise	0.851547	8.91571e-11	0.923669	2.65741e-15				RPL11	384	Cluster 1	Clustered	24
USMG5	turquoise	0.851467	8.98899e-11	0.9327	3.56296e-16				RPL24	386	Cluster 1	Clustered	24
UAP1L1	turquoise	0.851357	9.09208e-11	0.858674	4.18546e-11				RPL31	388	Cluster 1	Clustered	24
COA4	turquoise	0.851309	9.13719e-11	0.93209	4.11521e-16				RPL30	390	Cluster 1	Clustered	24
ATP5I	turquoise	0.851069	9.36584e-11	0.935728	1.70517e-16				RPL36	392	Cluster 1	Clustered	24
BTBD6	turquoise	0.850796	9.63221e-11	0.844485	1.81605e-10				EXOSC4	394		Unclustered	17
C9orf16	turquoise	0.850752	9.67593e-11	0.864927	2.08271e-11				RPL35	395	Cluster 1	Clustered	24
FAM96B	turquoise	0.850231	1.0207e-10	0.958743	1.3489e-19				RPL37	397	Cluster 1	Clustered	24
ZNRD1	turquoise	0.850173	1.02679e-10	0.915357	1.3735e-14				RPL10L	399	Cluster 1	Clustered	24
RPL11	turquoise	0.84928	1.12467e-10	0.768392	7.06388e-08				RPL22L1	401	Cluster 1	Clustered	24
C12orf57	turquoise	0.849162	1.13828e-10	0.860518	3.41877e-11				RPL34	404	Cluster 1	Clustered	24
FAM173A	turquoise	0.848932	1.16518e-10	0.92387	2.54826e-15				RPS7	407	Cluster 1	Clustered	24
M6PR	turquoise	0.848853	1.17448e-10	0.83986	2.84017e-10				RPL14	409	Cluster 1	Clustered	24
PFDN2	turquoise	0.848144	1.26176e-10	0.913869	1.81027e-14				RPL12	413	Cluster 1	Clustered	24
NDST2	turquoise	0.847689	1.32081e-10	0.824329	1.15712e-09				RPL27	415	Cluster 1	Clustered	24
HCST	turquoise	0.846868	1.43419e-10	0.863497	2.45043e-11				RPL23A	417	Cluster 1	Clustered	24
COX7B	turquoise	0.846865	1.4346e-10	0.900914	1.65573e-13				RPL29	419	Cluster 1	Clustered	24
TNFAIP3	turquoise	0.846855	1.43598e-10	0.832101	5.83178e-10				FAU	423	Cluster 1	Clustered	24
RBCK1	turquoise	0.846217	1.53023e-10	0.843782	1.94551e-10				RPS16	424	Cluster 1	Clustered	24
STX4	turquoise	0.846205	1.53217e-10	0.784529	2.44562e-08				RPS17	431	Cluster 1	Clustered	24
NDUFB3	turquoise	0.846054	1.5553e-10	0.921275	4.34455e-15				RPP40	436		Unclustered	9
MYEOV2	turquoise	0.845754	1.6023e-10	0.938391	8.655e-17				RPS18	444	Cluster 1	Clustered	24
RPL24	turquoise	0.845097	1.70976e-10	0.882264	2.46937e-12				RPS24	446	Cluster 1	Clustered	24
MRPL57	turquoise	0.845043	1.71892e-10	0.890696	7.73108e-13				RPS25	450	Cluster 1	Clustered	24
CDK4	turquoise	0.84481	1.75881e-10	0.919747	5.89657e-15				RPS19	454	Cluster 1	Seed	24
MRPS18A	turquoise	0.844503	1.81287e-10	0.938074	9.39642e-17				GLRX2	473		Unclustered	0
C3	turquoise	0.844299	1.84945e-10	0.694936	3.61816e-06				TXN	474		Unclustered	0.4
OXLD1	turquoise	0.843303	2.03875e-10	0.898708	2.3411e-13				POLR2I	477	Cluster 4	Clustered	8
NEDD8	turquoise	0.842476	2.20916e-10	0.92164	4.03423e-15				HDAC3	479		Unclustered	4
NFKBIE	turquoise	0.841701	2.38098e-10	0.925992	1.62436e-15				POLR2L	481	Cluster 4	Clustered	8
RPS18	turquoise	0.841554	2.4149e-10	0.872991	8.02934e-12				ZNRD1	483		Unclustered	3
COL4A2	turquoise	0.84136	2.46051e-10	0.714911	1.39999e-06				MAFB	485		Unclustered	4
PSMA7	turquoise	0.841359	2.46063e-10	0.886318	1.42895e-12				PRMT1	487		Unclustered	3
TMEM147	turquoise	0.84103	2.53971e-10	0.851023	9.41008e-11				POLR2H	489	Cluster 4	Clustered	8
PHPT1	turquoise	0.840744	2.61019e-10	0.93581	1.67053e-16				HCST	491		Unclustered	0
RPL35	turquoise	0.839438	2.95643e-10	0.872091	8.95916e-12				TYROBP	492		Unclustered	0.666667
RNF7	turquoise	0.839305	2.99395e-10	0.936632	1.35918e-16				HINT1	495		Unclustered	0
PHF5A	turquoise	0.838732	3.16078e-10	0.854761	6.37131e-11				NR1H3	499		Unclustered	0
GUK1	turquoise	0.838628	3.19195e-10	0.882895	2.27077e-12				HSPE1	501		Unclustered	0
MTFP1	turquoise	0.837797	3.45144e-10	0.933345	3.05417e-16				LSM4	513	Cluster 4	Clustered	8
SNX11	turquoise	0.837524	3.54096e-10	0.87755	4.55085e-12				PHF5A	514	Cluster 4	Clustered	8
N6AMT2	turquoise	0.837402	3.58168e-10	0.814866	2.55088e-09				SNRPF	517	Cluster 4	Clustered	8
PET100	turquoise	0.837317	3.61034e-10	0.908919	4.3834e-14				SNRPG	519	Cluster 4	Clustered	8
GLRX2	turquoise	0.836309	3.966e-10	0.846384	1.50501e-10				SNRPD2	522	Cluster 4	Clustered	8
NDUFA6	turquoise	0.836121	4.03595e-10	0.89201	6.3963e-13				YBX1	524	Cluster 4	Seed	8
MIIP	turquoise	0.835084	4.44226e-10	0.807118	4.71654e-09				MRPL12	537	Cluster 3	Clustered	8
TOMM22	turquoise	0.835046	4.4576e-10	0.835883	4.12581e-10				MRPS28	539	Cluster 3	Clustered	8
COL6A3	turquoise	0.834832	4.54638e-10	0.748009	2.40439e-07				MRPL17	541	Cluster 3	Clustered	8
COX7A1	turquoise	0.834775	4.57025e-10	0.752589	1.8446e-07				MRPL33	543	Cluster 3	Clustered	8
RABGEF1	turquoise	0.834621	4.63534e-10	0.872997	8.02331e-12				MRPL57	545	Cluster 3	Clustered	8
PLXNA1	turquoise	0.834468	4.70099e-10	0.841863	2.34414e-10				MRPL52	550	Cluster 3	Clustered	8
DPT	turquoise	0.834258	4.79258e-10	0.709275	1.84456e-06				MRPS18A	552	Cluster 3	Clustered	8
RPL37	turquoise	0.834017	4.89935e-10	0.765648	8.38931e-08				MRPL14	555	Cluster 3	Clustered	8
PHB	turquoise	0.833643	5.07001e-10	0.920359	5.22181e-15				MRPL21	557	Cluster 3	Seed	8
RILPL2	turquoise	0.833377	5.19432e-10	0.819621	1.72453e-09				RPL23L	565		Unclustered	4
BCS1L	turquoise	0.833267	5.24648e-10	0.857874	4.56588e-11				RPMS17	602		Unclustered	2
NHP2	turquoise	0.833073	5.33985e-10	0.917914	8.44089e-15				MSRB1	606		Unclustered	0
TNIP2	turquoise	0.832254	5.75197e-10	0.83083	6.53876e-10				MT2A	608		Unclustered	0
SNAPC5	turquoise	0.832223	5.7678e-10	0.894233	4.61628e-13				VCAM1	609		Unclustered	0
DDRGK1	turquoise	0.832092	5.83658e-10	0.882395	2.42677e-12				NDUFAF2	614	Cluster 2	Clustered	9
CXCL13	turquoise	0.831718	6.03691e-10	0.701911	2.61992e-06				NDUFB1	616	Cluster 2	Seed	10
RPS24	turquoise	0.830792	6.56121e-10	0.868069	1.44737e-11				NFKBIE	690		Unclustered	3
ROMO1	turquoise	0.830583	6.68518e-10	0.929719	7.12211e-16				NHP2	694		Unclustered	2
PTPRM	turquoise	0.829982	7.05367e-10	0.759097	1.25331e-07				NOP10	697		Unclustered	0.5
RPL27	turquoise	0.829576	7.31326e-10	0.75441	1.65753e-07				POP7	700		Unclustered	2
RRAS	turquoise	0.829412	7.42077e-10	0.733336	5.4196e-07				PFDN2	704		Unclustered	0
TIMM13	turquoise	0.829411	7.42142e-10	0.908666	4.5804e-14				UXT	705		Unclustered	0
NDUFA11	turquoise	0.829344	7.46566e-10	0.929913	6.81389e-16				PLXNA1	715		Unclustered	0.666667
S100A4	turquoise	0.828666	7.92771e-10	0.76796	7.25882e-08				RRAS	716		Unclustered	0.666667
SNRPG	turquoise	0.828479	8.05999e-10	0.833802	4.9968e-10				PLXND1	719		Unclustered	0
LAMB2	turquoise	0.828413	8.10702e-10	0.740879	3.59286e-07				TAF10	725		Unclustered	4
SIGIRR	turquoise	0.827855	8.51565e-10	0.776242	4.26273e-08				SNAPC5	727		Unclustered	3
FAM127A	turquoise	0.82753	8.76164e-10	0.806279	5.0329e-09				RPP25L	752		Unclustered	2
METTL1	turquoise	0.827469	8.80903e-10	0.798486	9.06422e-09				PRELID1	755		Unclustered	0
H2AFJ	turquoise	0.827383	8.87588e-10	0.868661	1.35e-11				TRIAP1	756		Unclustered	0
ACOT13	turquoise	0.827229	8.99626e-10	0.878207	4.18504e-12				RAB13	766	Cluster 11	Clustered	3
MRPS28	turquoise	0.826559	9.53901e-10	0.833806	4.99503e-10				RAB20	767	Cluster 11	Clustered	3
SNHG19	turquoise	0.826293	9.76239e-10	0.881434	2.75504e-12				STX4	769		Unclustered	0.666667
LOC158960	turquoise	0.826157	9.87832e-10	0.803072	6.43179e-09				RAB32	771	Cluster 11	Clustered	3
LEPROTL1	turquoise	0.826086	9.93961e-10	0.769726	6.49183e-08				RAB42	773	Cluster 11	Seed	3
MRPL17	turquoise	0.825755	1.02298e-09	0.956825	2.81377e-19				RABGEF1	778		Unclustered	0
SCARNA2	turquoise	0.825671	1.03051e-09	0.757054	1.41679e-07				TNFAIP3	784		Unclustered	1.66667
LGALS1	turquoise	0.82479	1.11202e-09	0.79876	8.88247e-09				TMEM173	1091		Unclustered	0
QDPR	turquoise	0.824616	1.12885e-09	0.856495	5.29715e-11				TNIP2	1093		Unclustered	2
POLR2I	turquoise	0.824348	1.1552e-09	0.957505	2.17706e-19				TXN2	1098		Unclustered	0
SRI	turquoise	0.824179	1.17207e-09	0.821986	1.41329e-09
TMEM119	turquoise	0.823943	1.19612e-09	0.674857	8.73443e-06
CISD3	turquoise	0.823393	1.25378e-09	0.703499	2.43114e-06
TMEM160	turquoise	0.823373	1.25599e-09	0.799768	8.24225e-09
CHCHD6	turquoise	0.823289	1.26497e-09	0.783898	2.55347e-08
SLC37A4	turquoise	0.823103	1.28523e-09	0.838236	3.31214e-10
ZNF593	turquoise	0.8231	1.28558e-09	0.900706	1.71108e-13
SERTAD1	turquoise	0.822553	1.34689e-09	0.869754	1.18617e-11
MRPL12	turquoise	0.822327	1.373e-09	0.848992	1.15809e-10
AP2S1	turquoise	0.822209	1.38679e-09	0.868163	1.4314e-11
RPL22L1	turquoise	0.822144	1.39447e-09	0.904884	8.6922e-14
PA2G4	turquoise	0.822	1.41161e-09	0.876516	5.18595e-12
EXOSC4	turquoise	0.821858	1.42872e-09	0.912611	2.27806e-14
RPL30	turquoise	0.821586	1.462e-09	0.739365	3.90612e-07
TXN2	turquoise	0.821176	1.51345e-09	0.850613	9.81562e-11
PIN1	turquoise	0.819056	1.80765e-09	0.861526	3.05715e-11
C6orf48	turquoise	0.819039	1.81021e-09	0.830774	6.57191e-10
OR7E37P	turquoise	0.818693	1.86314e-09	0.897148	2.9768e-13
NCBP2-AS2	turquoise	0.81857	1.88221e-09	0.803944	6.01965e-09
C1orf50	turquoise	0.818258	1.93148e-09	0.931038	5.26165e-16
NDUFB9	turquoise	0.818157	1.94775e-09	0.892689	5.7947e-13
CYSTM1	turquoise	0.818027	1.96878e-09	0.898142	2.55558e-13
RPP25L	turquoise	0.817371	2.07829e-09	0.933814	2.72765e-16
C11orf31	turquoise	0.81722	2.10431e-09	0.835224	4.38516e-10
MRPL23	turquoise	0.816862	2.16723e-09	0.895812	3.64563e-13
RALY-AS1	turquoise	0.816712	2.19419e-09	0.824583	1.13207e-09
CMC4	turquoise	0.816651	2.20512e-09	0.901057	1.6185e-13
MYO7A	turquoise	0.816126	2.30203e-09	0.720824	1.04081e-06
C17orf89	turquoise	0.815802	2.36366e-09	0.869328	1.2477e-11
TRIAP1	turquoise	0.815577	2.40752e-09	0.888259	1.09169e-12
LAMTOR1	turquoise	0.815345	2.45352e-09	0.89285	5.65965e-13
SNRPD2	turquoise	0.815199	2.48268e-09	0.935439	1.83211e-16
OXNAD1	turquoise	0.815196	2.48346e-09	0.894026	4.76037e-13
SNRPF	turquoise	0.815146	2.49353e-09	0.779067	3.53659e-08
MIEN1	turquoise	0.814304	2.66972e-09	0.930734	5.64564e-16
RPL10L	turquoise	0.814191	2.69419e-09	0.768069	7.20936e-08
NAA10	turquoise	0.814169	2.69902e-09	0.886266	1.43935e-12
ZNF511	turquoise	0.814093	2.71556e-09	0.868169	1.43041e-11
CLTB	turquoise	0.814086	2.71715e-09	0.842606	2.18162e-10
C1orf122	turquoise	0.814037	2.72786e-09	0.850137	1.03054e-10
LINC00998	turquoise	0.813983	2.73979e-09	0.827916	8.46948e-10
LOC100506100	turquoise	0.81256	3.07191e-09	0.895826	3.63792e-13
PRMT1	turquoise	0.812453	3.09834e-09	0.840455	2.68357e-10
HAUS7	turquoise	0.81233	3.12892e-09	0.831933	5.92095e-10
C17orf96	turquoise	0.812027	3.20566e-09	0.727366	7.43209e-07
POLR2L	turquoise	0.811753	3.27656e-09	0.90144	1.52263e-13
TRMT112	turquoise	0.81146	3.35369e-09	0.900002	1.91243e-13
RPP40	turquoise	0.811111	3.44812e-09	0.866525	1.73278e-11
CORO1B	turquoise	0.811105	3.44958e-09	0.89508	4.06942e-13
DTD1	turquoise	0.8107	3.56232e-09	0.842781	2.14481e-10
PLBD1	turquoise	0.810512	3.61575e-09	0.804806	5.63628e-09
TMSB10	turquoise	0.809627	3.87717e-09	0.698127	3.12489e-06
LOC101928000	turquoise	0.809555	3.89928e-09	0.863837	2.35801e-11
SPRYD4	turquoise	0.809473	3.92448e-09	0.758604	1.29107e-07
LINC00115	turquoise	0.809473	3.9245e-09	0.835817	4.15107e-10
DECR2	turquoise	0.809446	3.93262e-09	0.788435	1.86633e-08
RPL31	turquoise	0.809224	4.00205e-09	0.787132	2.04366e-08
MPP1	turquoise	0.809114	4.03644e-09	0.82337	1.25627e-09
RASGEF1A	turquoise	0.80863	4.19265e-09	0.723769	8.95441e-07
SRD5A3	turquoise	0.808523	4.22784e-09	0.804253	5.87957e-09
COQ4	turquoise	0.807604	4.54202e-09	0.920361	5.21925e-15
RPL29	turquoise	0.807408	4.61152e-09	0.874428	6.72997e-12
MOK	turquoise	0.807186	4.69189e-09	0.793538	1.29984e-08
COPRS	turquoise	0.806615	4.90398e-09	0.828622	7.95898e-10
PRELID1	turquoise	0.806127	5.09248e-09	0.946477	9.02237e-18
RPL34	turquoise	0.806024	5.13291e-09	0.705301	2.23209e-06
TMEM251	turquoise	0.805869	5.19447e-09	0.837676	3.49095e-10
UQCRQ	turquoise	0.805653	5.28144e-09	0.910567	3.28452e-14
POP7	turquoise	0.80558	5.31118e-09	0.947295	7.04086e-18
TIMM10	turquoise	0.805406	5.38263e-09	0.903403	1.10893e-13
ANAPC15	turquoise	0.804742	5.66403e-09	0.885722	1.55075e-12
SLA	turquoise	0.804695	5.68439e-09	0.72028	1.06991e-06
UBA52	turquoise	0.80435	5.83616e-09	0.857008	5.01324e-11
FDXR	turquoise	0.804264	5.87471e-09	0.810287	3.68041e-09
LYRM4	turquoise	0.804169	5.91734e-09	0.882695	2.33203e-12
RPL23A	turquoise	0.804128	5.93576e-09	0.808924	4.09708e-09
COA3	turquoise	0.803902	6.03894e-09	0.884644	1.79553e-12
HTATIP2	turquoise	0.803274	6.33394e-09	0.71987	1.09232e-06
NDUFS6	turquoise	0.803109	6.41385e-09	0.902112	1.36691e-13
TMEM126A	turquoise	0.803037	6.44898e-09	0.872879	8.13996e-12
RPL14	turquoise	0.803024	6.45525e-09	0.850069	1.03777e-10
PYCARD	turquoise	0.802757	6.58717e-09	0.804428	5.80128e-09
JDP2	turquoise	0.802612	6.65984e-09	0.814462	2.63571e-09
EBPL	turquoise	0.802554	6.68864e-09	0.810093	3.73741e-09
PUS3	turquoise	0.802504	6.7144e-09	0.857122	4.95197e-11
S100A16	turquoise	0.802048	6.94914e-09	0.730502	6.30227e-07
MMP24-AS1	turquoise	0.80178	7.09063e-09	0.854946	6.24758e-11
CMTM3	turquoise	0.801486	7.24915e-09	0.678306	7.54393e-06
CD8A	turquoise	0.800983	7.52782e-09	0.762838	9.98121e-08
YBX1	turquoise	0.800955	7.54365e-09	0.825044	1.08793e-09
PIM3	turquoise	0.800838	7.6103e-09	0.784446	2.45952e-08
CTSK	turquoise	0.800507	7.80055e-09	0.717646	1.2217e-06
TRAPPC5	turquoise	0.8005	7.80505e-09	0.879775	3.42097e-12
MTCH1	turquoise	0.800445	7.83697e-09	0.713406	1.50789e-06
CXCL12	turquoise	0.800159	8.00626e-09	0.695033	3.60215e-06
MRPL52	turquoise	0.80014	8.01709e-09	0.864373	2.21866e-11
LAMTOR2	turquoise	0.800008	8.09654e-09	0.742978	3.19644e-07
IGFBP7	green	0.962638	2.70312e-20	0.842851	2.13027e-10
SPARC	green	0.95171	1.71828e-18	0.818545	1.88608e-09
PTGDS	green	0.950834	2.29644e-18	0.879237	3.66684e-12
MMP9	green	0.950012	3.00084e-18	0.853473	7.29593e-11
ADAMDEC1	green	0.946119	1.00449e-17	0.877836	4.38832e-12
NR1H3	green	0.939555	6.37364e-17	0.891264	7.12554e-13
GPNMB	green	0.929713	7.13122e-16	0.855531	5.87128e-11
BRI3	green	0.924134	2.41115e-15	0.889973	8.57149e-13
RASSF4	green	0.922264	3.55263e-15	0.91627	1.15647e-14
APOC1	green	0.920774	4.80503e-15	0.902321	1.32183e-13
PLXND1	green	0.915478	1.34253e-14	0.850945	9.48646e-11
TGFB1I1	green	0.915143	1.4296e-14	0.917049	9.96947e-15
CEBPD	green	0.909935	3.67113e-14	0.868001	1.45894e-11
CST7	green	0.903487	1.09389e-13	0.893187	5.38735e-13
CYFIP1	green	0.89004	8.49091e-13	0.899038	2.22395e-13
CXCL9	green	0.889401	9.29675e-13	0.929005	8.36889e-16
SEPW1	green	0.888729	1.02205e-12	0.856225	5.45211e-11
MAFB	green	0.886413	1.4105e-12	0.928703	8.95584e-16
SLAMF8	green	0.884121	1.9268e-12	0.954979	5.53788e-19
NINJ1	green	0.883224	2.17325e-12	0.855769	5.72432e-11
FBXO6	green	0.880837	2.97913e-12	0.873459	7.58234e-12
ACVRL1	green	0.880591	3.07661e-12	0.839038	3.07063e-10
RGL1	green	0.879902	3.36476e-12	0.877372	4.65476e-12
APOE	green	0.876424	5.24649e-12	0.880012	3.31726e-12
CTSC	green	0.876138	5.43856e-12	0.903521	1.08774e-13
EFHD2	green	0.874739	6.47527e-12	0.894926	4.1642e-13
CCL5	green	0.874569	6.61332e-12	0.888989	9.85305e-13
RAB32	green	0.874365	6.78218e-12	0.894983	4.12875e-13
GPX1	green	0.872529	8.49493e-12	0.883544	2.08223e-12
GLIS2	green	0.868214	1.42289e-11	0.848358	1.23478e-10
CXCL10	green	0.8678	1.49364e-11	0.959042	1.19898e-19
DRAM1	green	0.864859	2.09903e-11	0.910725	3.19367e-14
SLCO2B1	green	0.860859	3.29221e-11	0.902623	1.25885e-13
FTH1P5	green	0.860577	3.39671e-11	0.942388	2.94855e-17
BLVRA	green	0.859218	3.94437e-11	0.848659	1.19782e-10
PLA2G7	green	0.852271	8.27098e-11	0.924007	2.4761e-15
LYZ	green	0.847982	1.28251e-10	0.867115	1.61796e-11
BLVRB	green	0.847644	1.32679e-10	0.905631	7.67545e-14
C1orf54	green	0.847141	1.39553e-10	0.909416	4.02061e-14
TRIM47	green	0.846375	1.50638e-10	0.837651	3.49912e-10
GNPDA1	green	0.844204	1.86689e-10	0.854729	6.39281e-11
ATP6V0C	green	0.842923	2.1155e-10	0.871958	9.10493e-12
CTSB	green	0.840695	2.62256e-10	0.962133	3.36156e-20
CD14	green	0.839184	3.0283e-10	0.93492	2.08311e-16
FTH1	green	0.839069	3.06163e-10	0.938977	7.42519e-17
CHI3L1	green	0.838061	3.36684e-10	0.951301	1.96893e-18
RAB20	green	0.837901	3.41812e-10	0.931954	4.24961e-16
COL1A2	green	0.837448	3.56632e-10	0.813402	2.87127e-09
FTL	green	0.833723	5.03311e-10	0.921891	3.83382e-15
FXYD6	green	0.831471	6.17308e-10	0.883601	2.06626e-12
VCAM1	green	0.830847	6.52877e-10	0.872932	8.08779e-12
A2M	green	0.828869	7.78655e-10	0.867819	1.49037e-11
CCL18	green	0.825434	1.05183e-09	0.890011	8.52503e-13
C1QB	green	0.824624	1.12806e-09	0.925097	1.9672e-15
LST1	green	0.823464	1.24622e-09	0.929594	7.32722e-16
GZMK	green	0.822817	1.31692e-09	0.865913	1.85985e-11
CFD	green	0.821446	1.47935e-09	0.852122	8.40017e-11
MT1F	green	0.818965	1.82147e-09	0.878709	3.92456e-12
DOK2	green	0.817489	2.05821e-09	0.905921	7.31085e-14
CYP27A1	green	0.816947	2.1522e-09	0.84616	1.53892e-10
CCL4	green	0.81648	2.23625e-09	0.889481	9.19123e-13
DCTD	green	0.813908	2.7565e-09	0.79363	1.29127e-08
TYROBP	green	0.812552	3.07378e-09	0.934438	2.34401e-16
UBE2F	green	0.812457	3.09747e-09	0.817042	2.13539e-09
KCTD12	green	0.811839	3.25398e-09	0.885261	1.65119e-12
HEBP1	green	0.811481	3.34816e-09	0.897654	2.75462e-13
MT2A	green	0.81042	3.64206e-09	0.935973	1.60394e-16
TNFAIP2	green	0.809504	3.91485e-09	0.949716	3.29998e-18
HS3ST3A1	green	0.807834	4.46151e-09	0.920739	4.83883e-15
IFITM1	green	0.806288	5.02939e-09	0.874149	6.96547e-12
TMEM173	green	0.804246	5.88259e-09	0.940302	5.22035e-17
AIF1	green	0.800061	8.06446e-09	0.938949	7.48009e-17
GS1-111G14.1	darkmagenta	0.859958	3.6367e-11	-0.808074	4.37881e-09
ESRRA	darkmagenta	0.849176	1.13666e-10	-0.851573	8.89128e-11
TUSC2	darkmagenta	0.835625	4.2258e-10	-0.862546	2.72784e-11
SCARNA17	darkmagenta	0.827019	9.16281e-10	-0.770754	6.0805e-08
SLC4A11	darkmagenta	0.801244	7.38237e-09	-0.770708	6.09848e-08

## Sheet: 46 Hub genes
Differentially co-expressed (hub/common) genes and gene expression levels in DLBCL and normal cases
shared name	MCODE_Cluster	MCODE_Node_Status	MCODE_Score	name	selected	logFC
C3	Cluster 3	Clustered	7	C3	FALSE	2.58232
HEBP1	Cluster 3	Clustered	7	HEBP1	FALSE	1.60042
CXCL13	Cluster 3	Clustered	7	CXCL13	FALSE	3.70111
CCL4	Cluster 3	Clustered	7	CCL4	FALSE	1.6423
CXCL9	Cluster 3	Clustered	7	CXCL9	FALSE	5.45362
CXCL12	Cluster 3	Clustered	7	CXCL12	FALSE	1.32776
CXCL10	Cluster 3	Clustered	7	CXCL10	FALSE	4.36927
CCL5	Cluster 3	Seed	7	CCL5	FALSE	3.16378
FAU	Cluster 1	Clustered	18	FAU	FALSE	1.23
RPL35	Cluster 1	Clustered	18	RPL35	FALSE	1.77464
RPL10L	Cluster 1	Clustered	18	RPL10L	FALSE	1.26203
RPS7	Cluster 1	Clustered	18	RPS7	FALSE	1.03784
RPS21	Cluster 1	Clustered	18	RPS21	FALSE	2.09092
RPS17	Cluster 1	Clustered	18	RPS17	FALSE	1.30159
RPL22L1	Cluster 1	Clustered	18	RPL22L1	FALSE	2.17112
RPL12	Cluster 1	Clustered	18	RPL12	FALSE	1.2934
MRPS18A		Unclustered	11	MRPS18A	FALSE	1.24637
RPL11	Cluster 1	Clustered	18	RPL11	FALSE	1.26847
UQCRQ	Cluster 2	Clustered	10	UQCRQ	FALSE	2.56862
RPL24	Cluster 1	Clustered	18	RPL24	FALSE	1.77048
RPL14	Cluster 1	Clustered	18	RPL14	FALSE	1.83721
RPL31	Cluster 1	Clustered	18	RPL31	FALSE	1.12652
RPS18	Cluster 1	Clustered	18	RPS18	FALSE	1.20769
RPS24	Cluster 1	Clustered	18	RPS24	FALSE	1.65972
RPL29	Cluster 1	Clustered	18	RPL29	FALSE	1.91681
RPL30	Cluster 1	Clustered	18	RPL30	FALSE	1.20129
RPS25	Cluster 1	Clustered	18	RPS25	FALSE	1.45164
RPL36	Cluster 1	Clustered	18	RPL36	FALSE	1.84054
RPS19	Cluster 1	Seed	18	RPS19	FALSE	1.60855
MRPL14	Cluster 4	Clustered	6	MRPL14	FALSE	1.83721
MRPS28	Cluster 4	Clustered	6	MRPS28	FALSE	1.72932
MRPL17	Cluster 4	Clustered	7	MRPL17	FALSE	2.10443
MRPL33	Cluster 4	Clustered	7	MRPL33	FALSE	2.05527
MRPL52	Cluster 4	Clustered	6	MRPL52	FALSE	1.04196
MRPL21	Cluster 4	Seed	7	MRPL21	FALSE	1.23168
NDUFS6	Cluster 2	Clustered	10	NDUFS6	FALSE	1.53679
NDUFB9	Cluster 2	Clustered	10	NDUFB9	FALSE	1.50976
NDUFB3	Cluster 2	Clustered	10	NDUFB3	FALSE	1.89311
NDUFB2	Cluster 2	Clustered	10	NDUFB2	FALSE	1.19915
NDUFA1	Cluster 2	Clustered	10	NDUFA1	FALSE	1.42763
NDUFAF2	Cluster 2	Clustered	9	NDUFAF2	FALSE	1.9899
NDUFB1	Cluster 2	Clustered	10	NDUFB1	FALSE	1.40477
UQCR11	Cluster 2	Clustered	10	UQCR11	FALSE	1.26853
NDUFA11	Cluster 2	Clustered	10	NDUFA11	FALSE	1.33529
NDUFA3	Cluster 2	Clustered	10	NDUFA3	FALSE	1.98884
NDUFA6	Cluster 2	Seed	10	NDUFA6	FALSE	1.4223

## Sheet: GEPIA2 validated genes
LIMMA Differential Method (GEPIA 2 database; http://gepia2.cancer-pku.cn/#index)
	Gene Symbol	Gene ID	Median (Tumor)	Median (Normal)	Log2(Fold Change)	adjp
C3	C3	ENSG00000125730.16	319.35	1.11	7.246	4.43e-116
HEBP1	HEBP1	ENSG00000013583.8	17.99	7.26	1.201	1.98e-21
CXCL13	CXCL13	ENSG00000156234.7	34.071	0.01	5.118	1.04e-164
CCL4	CCL4	ENSG00000275302.1	45.981	17.95	1.31	0.00855
CXCL9	CXCL9	ENSG00000138755.5	117.002	0.03	6.84	4.6e-170
CXCL12	CXCL12	ENSG00000107562.16	23.169	0.21	4.32	1.61e-125
CXCL10	CXCL10	ENSG00000169245.5	34.489	0.06	5.065	7.05e-140
FAU	FAU	ENSG00000149806.10	2254.04	243.486	3.205	2.61e-70
RPL35	RPL35	ENSG00000136942.14	3861.11	182.214	4.398	6.96e-78
RPS7	RPS7	ENSG00000171863.12	2477.38	58.08	5.391	2.87e-78
RPS21	RPS21	ENSG00000171858.17	4626.8	206.829	4.477	3.99e-74
RPS17	RPS17	ENSG00000182774.10	3341.55	102.273	5.016	2.41e-84
RPL22L1	RPL22L1	ENSG00000163584.17	243.014	3.36	5.806	1.1e-104
RPL12	RPL12	ENSG00000197958.12	3023.07	346.736	3.12	1.69e-63
MRPS18A	MRPS18A	ENSG00000096080.11	57.479	5.73	3.119	5.54e-75
RPL11	RPL11	ENSG00000142676.12	3122.53	182.606	4.088	2.01e-79
UQCRQ	UQCRQ	ENSG00000164405.10	316.222	17.05	4.135	3.99e-75
RPL24	RPL24	ENSG00000114391.12	2533.65	122.487	4.359	4.41e-89
RPL14	RPL14	ENSG00000188846.13	1646.86	192.951	3.087	1.27e-58
RPL31	RPL31	ENSG00000071082.10	3158.23	86.15	5.18	2.08e-67
RPS18	RPS18	ENSG00000231500.6	6787.67	335.227	4.336	2.9e-73
RPS24	RPS24	ENSG00000138326.18	4646.09	66.169	6.112	1.55e-94
RPL29	RPL29	ENSG00000162244.10	2387.52	333.004	2.838	9.78e-55
RPL30	RPL30	ENSG00000156482.10	3040.94	397.937	2.931	2.82e-56
RPS25	RPS25	ENSG00000118181.10	1941.29	147.574	3.709	4.91e-74
RPL36	RPL36	ENSG00000130255.12	2100.47	154.91	3.753	7.78e-75
RPS19	RPS19	ENSG00000105372.6	7405.08	531.637	3.797	7.8e-73
MRPL14	MRPL14	ENSG00000180992.6	88.04	3.78	4.219	8.55e-115
MRPS28	MRPS28	ENSG00000147586.9	46.84	1.9	4.044	1.33e-96
MRPL17	MRPL17	ENSG00000158042.8	70.282	2.47	4.361	1.53e-122
MRPL33	MRPL33	ENSG00000243147.7	82.612	19.37	2.037	7.56e-31
MRPL52	MRPL52	ENSG00000172590.18	225.47	19.03	3.499	1.64e-79
MRPL21	MRPL21	ENSG00000197345.12	92.27	7.14	3.518	2.26e-82
NDUFS6	NDUFS6	ENSG00000145494.11	108.307	7.96	3.609	4.85e-92
NDUFB9	NDUFB9	ENSG00000147684.7	243.604	37.919	2.652	2.31e-51
NDUFB3	NDUFB3	ENSG00000119013.8	103.773	10.51	3.186	2.26e-42
NDUFB2	NDUFB2	ENSG00000090266.12	317.342	16.99	4.145	1.53e-80
NDUFA1	NDUFA1	ENSG00000125356.6	206.657	16.11	3.601	2.11e-76
NDUFAF2	NDUFAF2	ENSG00000164182.10	30.279	1.22	3.817	6.13e-119
NDUFB1	NDUFB1	ENSG00000183648.9	375.741	24.09	3.908	7.77e-58
UQCR11	UQCR11	ENSG00000127540.11	207.82	31.34	2.691	6.14e-55
NDUFA11	NDUFA11	ENSG00000174886.12	332.105	39.81	3.029	8.57e-66
NDUFA3	NDUFA3	ENSG00000170906.15	259.411	40.36	2.654	1.82e-62
NDUFA6	NDUFA6	ENSG00000184983.9	61.061	6.96	2.963	4.78e-67
